# Supplementary material for: A sustainable strategic approach for N-alkylation of amines with activation of alcohols triggered via a hydrogen auto-transfer reaction using a Pd(ii) complex: evidence for metal–ligand cooperativity
Source: Royal Society of Chemistry journal article supplement (doi:10.1039/d4dt00864b), 2024-01-01
Supplement: d4dt00864b1.pdf [file d4dt00864b1.pdf]

## A sustainable strategic approach for N-alkylation of amines with activation of alcohols triggered via hydrogen auto-transfer reaction using Pd(II) complex: Evidences for metal-ligand cooperativity

Virendra Kumar Chaudhary,<sup>a</sup> Prashant Kukreti,<sup>a</sup> Keshav Sharma,<sup>a</sup> Kapil Kumar,<sup>a</sup> Sain Singh,<sup>a</sup> Sheela Kumari,<sup>a</sup> and Kaushik Ghosh<sup>a,b\*</sup>

<sup>a</sup>Department of Chemistry, Indian Institute of Technology Roorkee, Roorkee 247667, Uttarakhand, India

<sup>b</sup>Department of Biosciences and Bioengineering, Indian Institute of Technology Roorkee, Roorkee 247667, Uttarakhand, India

E-mail: [kaushik.ghosh@cy.iitr.ac.in](mailto:kaushik.ghosh@cy.iitr.ac.in)

| Table of Contents                                                                                      |                        |
|--------------------------------------------------------------------------------------------------------|------------------------|
| Preparation of 3,5-di(tert-butyl)-2-hydroxy azobenzene [LH <sub>2</sub> ] <sup>+</sup>                 |                        |
| Mercury drop experiment                                                                                |                        |
| Optimization of the reaction conditions                                                                | Table S1- Table S8     |
| Detection of H <sub>2</sub> O <sub>2</sub>                                                             | Figure S1              |
| Studies for intermediate formation and quantifying progress of reaction over time                      | Figure S2              |
| Detection of N-H/N-D Stretching                                                                        | Figure S3              |
| Electronic absorption spectra of ligand and metal complex in CH <sub>2</sub> Cl <sub>2</sub>           | Figure S4              |
| IR spectra of the ligand [LH <sub>2</sub> ] <sup>+</sup>                                               | Figure S5              |
| IR spectra of the complex [Pd(L)Cl] (1)                                                                | Figure S6              |
| Reaction of Alcohol and Anilines in Presence of Only KO <sup>t</sup> Bu.                               | Table S9               |
| Crystal data and structural refinement parameters for complexes 1.                                     | Table S10              |
| Selected bond lengths (Å) and bond angles (°) of complex 1.                                            | Table S11              |
| Conversion of benzyl alcohol to benzaldehyde in presence of air.                                       | Table S12              |
| <sup>1</sup> H NMR spectrum of ligand [LH <sub>2</sub> ] <sup>+</sup> in CDCl <sub>3</sub> (500 MHz).  | Figure S7              |
| <sup>13</sup> C NMR spectrum of ligand [LH <sub>2</sub> ] <sup>+</sup> in CDCl <sub>3</sub> (500 MHz). | Figure S8              |
| <sup>1</sup> H NMR spectrum of complex [Pd(L)Cl] in CDCl <sub>3</sub> (500 MHz).                       | Figure S9              |
| <sup>13</sup> C NMR spectrum of complex [Pd(L)Cl] in CDCl <sub>3</sub> (500 MHz).                      | Figure S10             |
| <sup>1</sup> H NMR and <sup>13</sup> C NMR spectra of N-alkylated products                             | Figure S11- Figure S70 |
| <sup>1</sup> H NMR spectrum of <b>2a''</b> in CDCl <sub>3</sub> (500 MHz).                             | Figure S71             |

### Preparation of 3,5-di(tert-butyl)-2-hydroxy azobenzene [LH<sub>2</sub>]<sup>+</sup>

The synthesis of the ligand [LH<sub>2</sub>]<sup>+</sup> was performed by procedure that is used in the first step of the preparation of azo dye, the first being the synthesis of an aromatic diazonium salt of the azo-amine {(E)-2-(phenyldiazenyl)aniline}. To an aqueous solution of 2.0 mmol of amine, was added 8.0 mmol of conc. HCl until the solution was nearly clear (azo-amine does not dissolve completely in the acidic solution of HCl). The mixture was cooled below 0 °C. After that, a solution of 2.5 mmol of NaNO<sub>2</sub> was added dropwise. The second step is neutralization of the diazonium salt by the aqueous solution of NaOH at temperature less than 5 °C. Upon addition of the NaOH, brownish colour ppt come out as neutralization reaction going to completion. After 3-4 h, the ppt was filtered out and purify by column chromatography. This gives blood red colour solid ligand [LH<sub>2</sub>]<sup>+</sup> with the yield approximately 20% . The desired product is fully characterized by <sup>1</sup>H and <sup>13</sup>C NMR spectroscopies (fig. S11-S12).

### Mercury drop experiment:

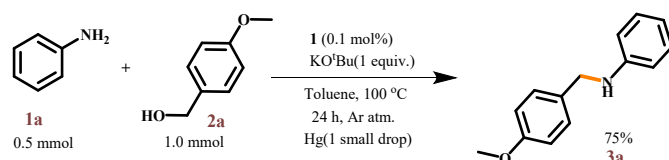

We performed a mercury drop test to figure out the homogeneity of the **1** in N-alkylation reaction. Schlenk flask was charged with 1.0 mmol alcohol, 0.5 mmol aniline, 1 equiv. of base and 0.1 mol% of catalyst **1** and linked to the condenser under argon flow. A small drop of mercury was added to this reaction mixture, and the mixture was refluxed for 24 hours at 100 °C. After a 24-hour period, the product's isolation confirmed the catalyst's homogeneous behaviour.

### Optimization of the reaction conditions

#### The general method for N-alkylation reaction with amines and alcohols as substrates

To a 10 mL seal tube charged with a PTFE stirring magnetic bar, was added catalyst (0.1 mol%), alcohol (1.0 mmol), amine (0.5 mmol), base (1 equivalent), and solvent. The reaction mixture was stirred for 24 h at 100 °C. After cooled to rt, the crude reaction mixture was diluted with 5 mL of DCM, extracted three times through a Whatman Filter Paper Grade 42, and collected for column chromatography.

#### (1) Solvent screening

Table S1. Solvent screenings

| Entry | Solvent | Yield. (%) |
|-------|---------|------------|
| 1     | Benzene | 82         |
| 2     | DMSO    | 55         |
| 3     | Toluene | 92         |
| 4     | DMF     | 76         |
| 5     | Xylene  | 85         |
| 6     | THF     | 70         |
| 7     | ACN     | Trace      |
| 8     | EtOH    | 40         |
| 9     | -       | 15         |

Reaction conditions: **1a** (0.5 mmol), **2a** (1.0 mmol), **1** (0.1 mol%), KO<sup>t</sup>Bu (1 equiv.) and solvent (3 mL), seal tube, 100 °C oil bath, 24 h.

## (2) Base screening

Table S2. Base screenings

| Entry | Base                            | Yield. (%) |
|-------|---------------------------------|------------|
| 1     | KO <sup>t</sup> Bu              | 92         |
| 2     | NaO <sup>t</sup> Bu             | 60         |
| 3     | NaOH                            | 18         |
| 4     | KOH                             | 15         |
| 5     | Cs <sub>2</sub> CO <sub>3</sub> | 48         |
| 6     | K <sub>3</sub> PO <sub>4</sub>  | Trace      |
| 7     | -                               | Trace      |

Reaction conditions: **1a** (0.5 mmol), **2a** (1.0 mmol), **1** (0.1 mol%), Base (1 equiv.) and Toluene (3 mL), seal tube, 100 °C oil bath, 24 h.

## (3) Reactant ratio screening

Table S3. Reactant ratio Screenings

| Entry | Molar ratio of reactants<br>(1a : 2a) | Yield. (%) |
|-------|---------------------------------------|------------|
| 1     | 0.5 : 0.5                             | 72         |
| 2     | 0.5 : 1.0                             | 92         |
| 3     | 0.5 : 1.5                             | 92         |
| 4     | 1.0 : 0.5                             | 90         |
| 5     | 1.5 : 0.5                             | 85         |

Reaction conditions: **1a**, **2a**, **1** (0.1 mol%), KO<sup>t</sup>Bu (1 equiv.) and Toluene (3 mL), seal tube, 100 °C oil bath, 24 h.

## (4) Base amount screening

Table S4. Base Amount Screenings

| Entry | Base (KO <sup>t</sup> Bu) amount<br>(equiv.) | Yield. (%) |
|-------|----------------------------------------------|------------|
| 1     | 0                                            | 16         |
| 2     | 0.5                                          | 78         |
| 3     | 1.0                                          | 92         |
| 4     | 1.1                                          | 92         |
| 5     | 1.5                                          | 92         |

Reaction conditions: **1a** (0.5 mmol), **2a** (1.0 mmol), **1** (0.1 mol%), Base (x equiv.) and Toluene (3 mL), seal tube, 100 °C oil bath, 24 h.

## (5) Catalyst screening

**Table S5.** Optimization of catalysts

| Entry | Catalysts                                            | N-alkylation (%) | imine (%) |
|-------|------------------------------------------------------|------------------|-----------|
| 1     | <b>1</b>                                             | 92               | trace     |
| 2     | <b>PdCl<sub>2</sub></b>                              | 10               | 15        |
| 3     | <b>Pd(oAc)<sub>2</sub></b>                           | n.d              | 12        |
| 4     | <b>PdCl<sub>2</sub>(PPh<sub>3</sub>)<sub>2</sub></b> | 13               | 20        |
| 5     | <b>L</b>                                             | -                | 35        |
| 6     | -                                                    | -                | 18        |

Reaction conditions: **1a** (0.5 mmol), **2a** (1.0 mmol), catalyst (0.1 mol%), KO<sup>t</sup>Bu (1 equiv.) and Toluene (3 mL), seal tube, 100 °C oil bath, 24 h.

## (6) Catalyst loading screening

**Table S6.** Catalyst Loading Screenings

| Entry | Catalyst loading (mol %) | Yield. (%) |
|-------|--------------------------|------------|
| 1     | 0.01                     | 38         |
| 2     | 0.02                     | 52         |
| 3     | 0.05                     | 76         |
| 4     | 0.1                      | 92         |
| 5     | 0.2                      | 92         |
| 6     | 0.5                      | 92         |
| 7     | 1.0                      | 92         |

Reaction conditions: **1a** (0.5 mmol), **2a** (1.0 mmol), **1** (x mol%), KO<sup>t</sup>Bu (1 equiv.) and Toluene (3 mL), seal tube, 100 °C oil bath, 24 h.

## (7) Temperature screening

**Table S7.** Temperature screenings

| Entry | Temperature (°C) | Yield. (%) |
|-------|------------------|------------|
| 1     | 50               | 35         |
| 2     | 70               | 77         |
| 3     | 100              | 92         |
| 4     | 110              | 92         |
| 5     | 120              | 92         |

Reaction conditions: **1a** (0.5 mmol), **2a** (1.0 mmol), **1** (0.1 mol %), KO<sup>t</sup>Bu (1 equiv.) and Toluene (3 mL), seal tube, Temp( °C) oil bath, 24 h.

## (8) Reaction time screening

**Table S8.** Reaction Time Screenings

| Entry | Reaction time | Yield. (%) |
|-------|---------------|------------|
| 1     | 1.0 h         | trace      |
| 2     | 6.0 h         | 44         |
| 3     | 12.0 h        | 64         |
| 4     | 18.0 h        | 78         |
| 5     | 24.0 h        | 92         |

Reaction conditions: **1a** (0.5 mmol), **2a** (1.0 mmol), **1** (0.1 mol %), KO<sup>t</sup>Bu (1 equiv.) and Toluene (3 mL), seal tube, 100 °C oil bath, Time (h).

**Figure S1.** (a) Plausible mechanism of alcohol oxidation in presence of air and (b) Electronic absorption spectra change during the formation of I<sub>3</sub><sup>-</sup> ion in presence of H<sub>2</sub>O<sub>2</sub> (detection of H<sub>2</sub>O<sub>2</sub> from the reaction mixture).

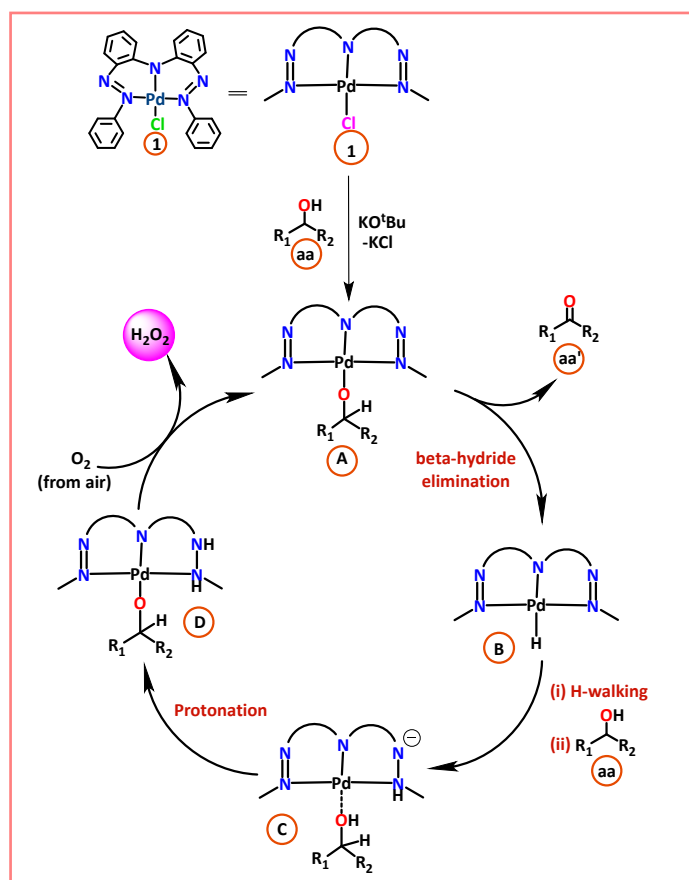

(a) Plausible mechanism of alcohol oxidation in presence of air

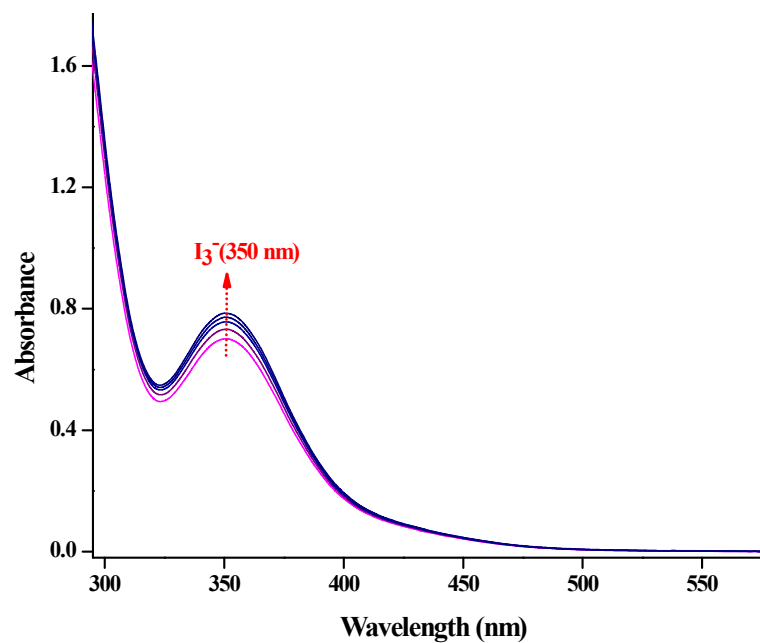

(b) Electronic absorption spectra change during the formation of  $I_3^-$  ion

**Figure S2.** Studies for intermediate formation and quantifying progress of reaction over time

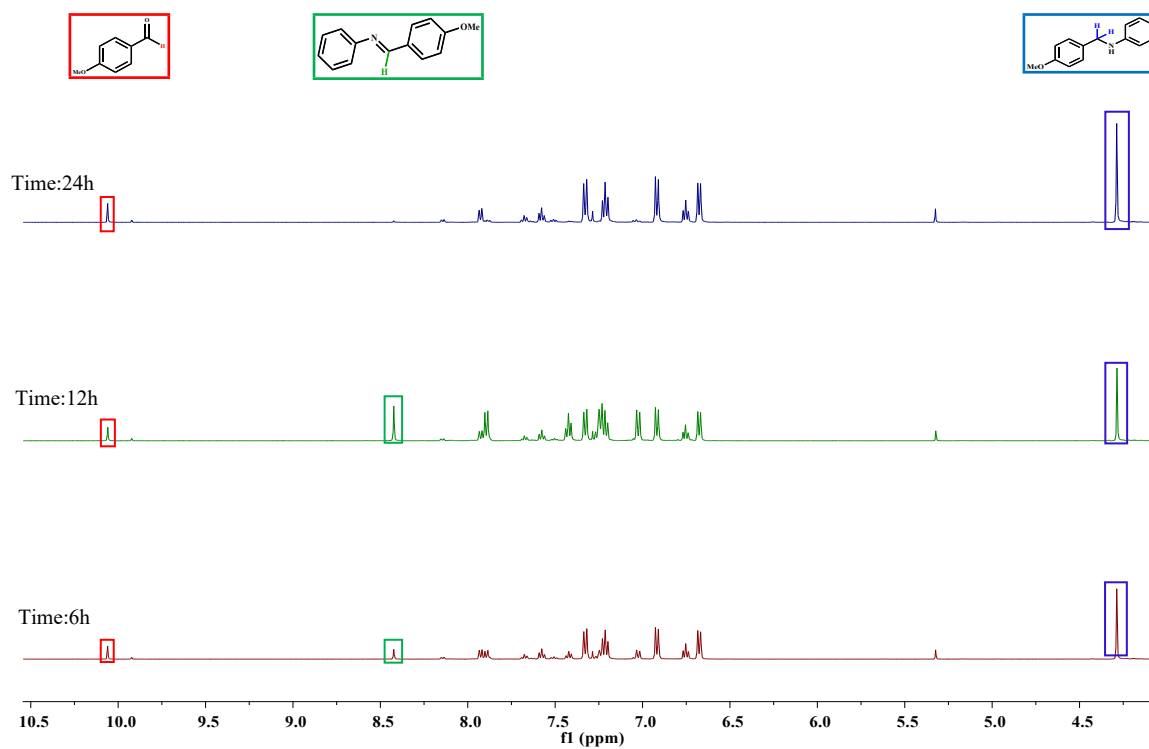

**Figure S2.**  $^1H$  NMR spectra (500 MHz) of crude reaction mixture performed under optimized conditions (separating catalyst by flash column) after 6 h, 12 h, 24 h in  $CDCl_3$ .

**Figure S3.** Control Experiment for Detection of N-H/N-D Stretching using Methanol/Methanol-d<sub>4</sub><sup>1,2</sup>

A pressure tube that had been dried in the oven and had a magnetic stir bar was filled with Methanol (CH<sub>3</sub>OH) (1.0 mL), catalyst **1** (0.01 mol%), and 1.0 equivalent of <sup>t</sup>BuOK. After that, a PTFE screw cap was used to tightly seal the tube. Over the course of 24 hours, the reaction mixture was stirred at 100 °C. The reaction mixture was dried once the reaction had been completed. The IR spectrum of the resulting reaction mixture displayed the characteristic stretching frequencies of N-H bonds at  $\nu_{(N-H)} = 2915$  and  $2950\text{ cm}^{-1}$ , respectively. An analogous experiment was conducted with methanol-d<sub>4</sub> (CD<sub>3</sub>OD), adhering to the experimental procedure already reported. Here, N-D bonds stretching was observed in the IR spectrum analysis of the reaction mixture that was generated, specifically in the regions  $\nu_{(N-D)} = 2323$  and  $2358\text{ cm}^{-1}$ .

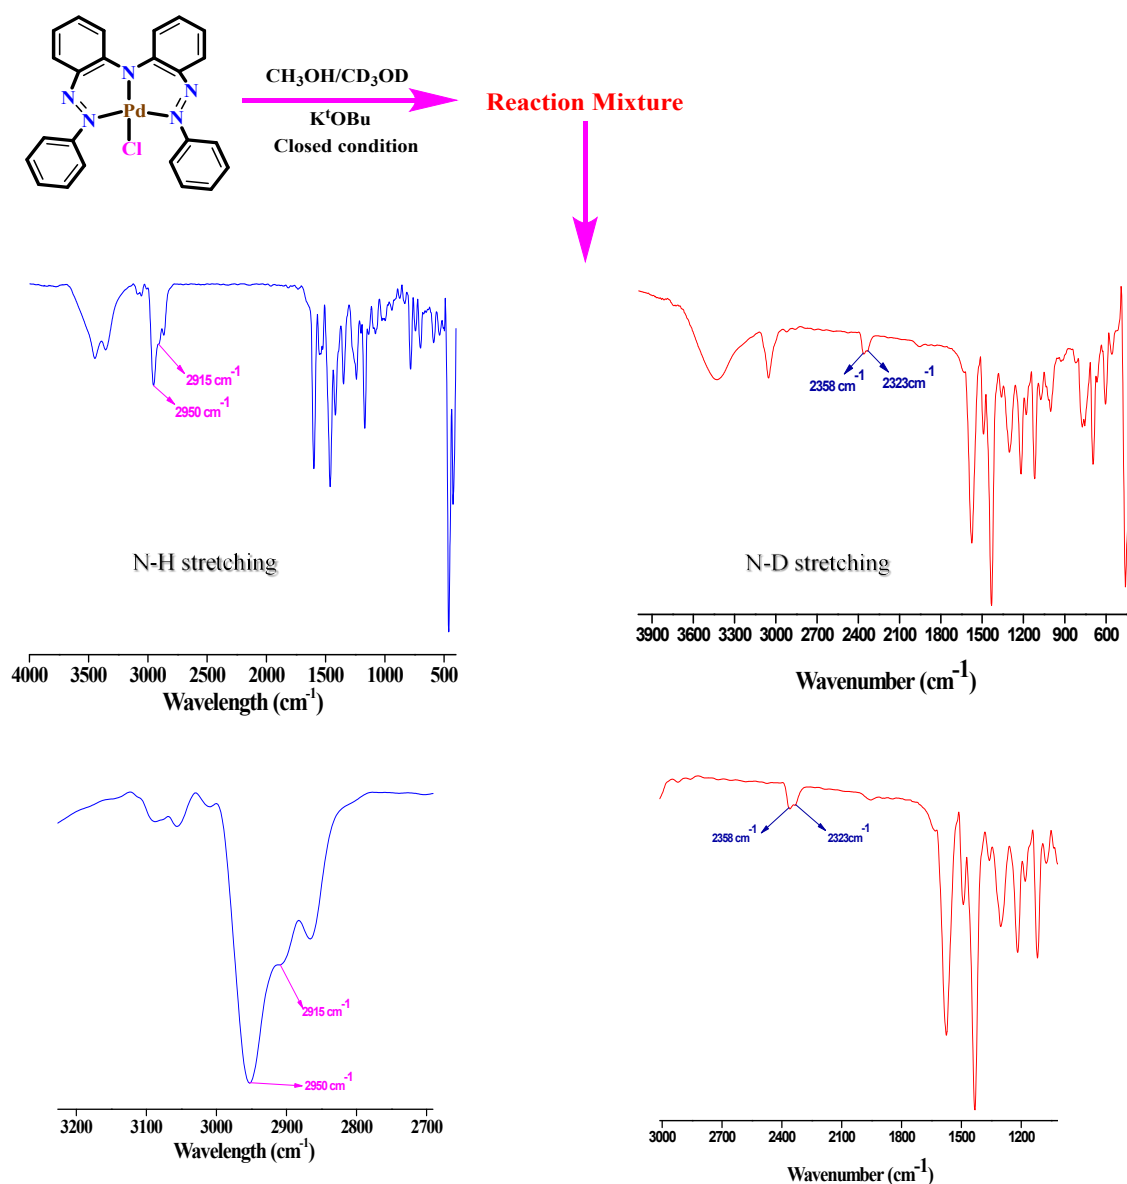

**Figure S3.** IR spectra of the reaction mixture showing N-H (blue) and N-D (red) stretching.

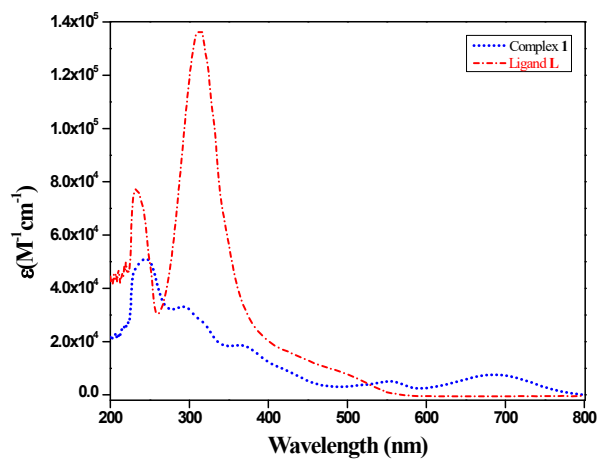

Figure S4. Electronic absorption spectra of ligand and metal complex in  $\text{CH}_2\text{Cl}_2$ .

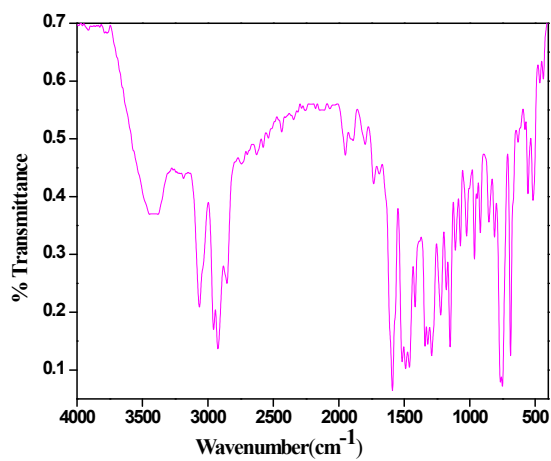

Figure S5. IR spectra of the ligand  $[\text{LH}_2]^+$

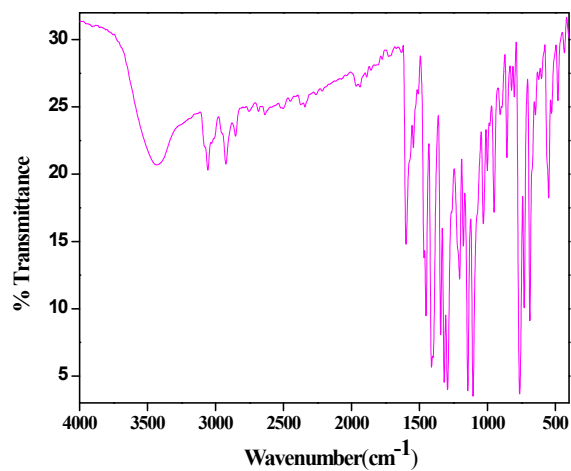

Figure S6. IR spectra of the complex  $[\text{Pd}(\text{L})\text{Cl}]$  (1)



**Table S9.** Reaction of Alcohol and Anilines in Presence of Only KO<sup>t</sup>Bu.

| Articles                                                                                                                                                                                                                                                                           | Reported Yield                                                                     |
|------------------------------------------------------------------------------------------------------------------------------------------------------------------------------------------------------------------------------------------------------------------------------------|------------------------------------------------------------------------------------|
|                                                                                                                                                                                                                                                                                    | 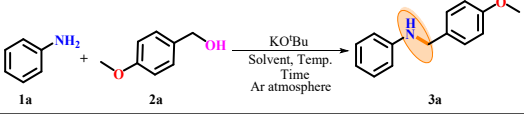 |
| <sup>3</sup> Elangovan, S.; Neumann, J.; Sortais, J. B.; Junge, K.; Darcel, C.; Beller, M. Efficient and Selective N-Alkylation of Amines with Alcohols Catalysed by Manganese Pincer Complexes. <i>Nat. Commun.</i> <b>2016</b> , <i>7</i> , 1–8.                                 | 0%<br>(1.0 equiv. tBuOK, toluene, 80 °C, 24 h)                                     |
| <sup>4</sup> Blank, B.; Madalska, M.; Kempe, R. An Efficient Method for the Selective Iridium-Catalyzed Monoalkylation of (Hetero)Aromatic Amines with Primary Alcohols. <i>Adv. Synth. Catal.</i> <b>2008</b> , <i>350</i> , 749–758.                                             | 4%<br>(1.0 equiv. tBuOK, diglyme, 110 °C, 24 h)                                    |
| <sup>5</sup> Vellakkaran, M.; Singh, K.; Banerjee, D. An Efficient and Selective Nickel-Catalyzed Direct N-Alkylation of Anilines with Alcohols. <i>ACS Catal.</i> <b>2017</b> , <i>7</i> , 8152–8158.                                                                             | 0%<br>(1.0 equiv. tBuOK, toluene, 130 °C, 48 h)                                    |
| <sup>6</sup> Bains, A. K.; Kundu, A.; Yadav, S.; Adhikari, D. Borrowing Hydrogen-Mediated N-Alkylation Reactions by a Well-Defined Homogeneous Nickel Catalyst. <i>ACS Catal.</i> <b>2019</b> , <i>9</i> , 9051–9059.                                                              | 0%<br>(1.0 equiv. tBuOK, toluene, 130 °C, 48 h)                                    |
| <sup>7</sup> Subaramanian, M.; Midya, S. P.; Ramar, P. M.; Balaraman, E. General Synthesis of N-Alkylation of Amines with Secondary Alcohols via Hydrogen Autotransfer. <i>Org. Lett.</i> <b>2019</b> , <i>21</i> , 8899–8903.                                                     | Trace<br>(1.0 equiv. tBuOK, n-octane, 110 °C, 24 h)                                |
| <sup>8</sup> Kaloğlu, N.; Achard, M.; Bruneau, C.; Özdemir, İ. Ruthenium(II)-(Arene)-N-Heterocyclic Carbene Complexes: Efficient and Selective Catalysts for the N-Alkylation of Aromatic Amines with Alcohols. <i>Eur. J. Inorg. Chem.</i> <b>2019</b> , <i>2019</i> , 2598–2606. | 0%<br>(1.5 equiv. tBuOK, solvent free condition, 120 °C, 20 h)                     |
| <sup>9</sup> Huang, M.; Li, Y.; Li, Y.; Liu, J.; Shu, S.; Liu, Y.; Ke, Z. Room Temperature N-Heterocyclic Carbene Manganese Catalyzed Selective N-Alkylation of Anilines with Alcohols. <i>Chem. Commun.</i> <b>2019</b> , <i>55</i> , 6213–6216.                                  | Trace<br>(1.0 equiv. tBuOK, toluene, 50 °C, 24 h)                                  |
| <sup>10</sup> Wei, D.; Yang, P.; Yu, C.; Zhao, F.; Wang, Y.; Peng, Z. N-Alkylation of Amines with Alcohols Catalyzed by Manganese(II) Chloride or Bromopentacarbonylmanganese(I). <i>J. Org. Chem.</i> <b>2021</b> , <i>86</i> , 2254–2263.                                        | Trace<br>(1.2 equiv. tBuOK, toluene, P(Ph) <sub>3</sub> , 100 °C, 20 h)            |
| <sup>11</sup> Landge, V. G.; Mondal, A.; Kumar, V.; Nandakumar, A.; Balaraman, E. Manganese Catalyzed N-Alkylation of Anilines with Alcohols: Ligand Enabled Selectivity. <i>Org. Biomol. Chem.</i> <b>2018</b> , <i>16</i> , 8175–8180.                                           | 0%<br>(1.1 equiv. tBuOK, toluene, 140 °C, 18 h)                                    |
| <sup>12</sup> Sankar, V.; Kathiresan, M.; Sivakumar, B.; Mannathan, S. Zinc-Catalyzed N-Alkylation of Aromatic Amines with Alcohols: A Ligand-Free Approach. 2020, pp 4409–4414.                                                                                                   | 55%<br>(1.0 equiv. tBuOK, toluene, 140 °C, 36 h)                                   |
| <sup>13</sup> Lan, X. B.; Ye, Z.; Yang, C.; Li, W.; Liu, J.; Huang, M.; Liu, Y.; Ke, Z. Tungsten-Catalyzed Direct N-Alkylation of Anilines with Alcohols. <i>ChemSusChem</i> <b>2021</b> , <i>14</i> , 860–865.                                                                    | 27%<br>(1.0 equiv. tBuOK, toluene, 130 °C, 24 h)                                   |
| <b>Our work</b>                                                                                                                                                                                                                                                                    | Trace<br>(1.0 equiv. tBuOK, toluene, 100 °C, 24 h)                                 |

**Table S10.** Crystal data and structural refinement parameters for complexes **1**.

|                                        |                                                      |                                                |                                                |
|----------------------------------------|------------------------------------------------------|------------------------------------------------|------------------------------------------------|
| Chemical formula                       | C <sub>24</sub> H <sub>18</sub> Cl N <sub>5</sub> Pd | Formula weight                                 | 518.28                                         |
| T(K)                                   | 293.0 K                                              | a(Å)                                           | 8.8728(9)                                      |
| λ(A)(Mo-Kα)                            | 0.71073                                              | b(Å)                                           | 10.6090(11)                                    |
| Crystal system                         | triclinic                                            | c(Å)                                           | 12.3959(14)                                    |
| Space group                            | P -1                                                 | α(°)                                           | 73.308(4)°                                     |
| V(Å <sup>3</sup> )                     | 1066.9(2)                                            | β(°)                                           | 73.136(4)°                                     |
| Z                                      | 2                                                    | γ(°)                                           | 88.997(4)°                                     |
| ρ <sub>calc</sub> (g/cm <sup>3</sup> ) | 1.613                                                | Crystal size/mm <sup>3</sup>                   | 0.28 × 0.26 × 0.21                             |
| F(000)                                 | 520.0                                                | Theta range(°)                                 | 1.14–28.383                                    |
| Data/Restraints/parameters             | 5361/0/280                                           | Index ranges                                   | –11 < h < 11,<br>–14 < k < 14,<br>–16 < l < 16 |
| GOF on F <sup>2</sup>                  | 1.089                                                | wR <sub>2</sub> [all data]                     | 0.0481                                         |
| Final R indexes [I>=2σ(I)]             | R <sub>1</sub> = 0.0187<br>wR <sub>2</sub> = 0.0466  | Largest diff.<br>peak/hole / e Å <sup>-3</sup> | 0.32/-0.33                                     |
| Final R indexes [all data]             | R <sub>1</sub> = 0.0207<br>wR <sub>2</sub> = 0.0481  | R <sub>sigma</sub>                             | 0.0167                                         |
| Reflections collected                  | 17989                                                | R <sub>int</sub>                               | 0.0206                                         |

GOF =  $[\sum(w(F_o^2 - F_c^2)^2) / M - N]^{1/2}$  ( M = number of reflections, N = number of parameters refined).  $R_1 = \sum ||F_o| - |F_c|| / \sum |F_o|$ .  $wR_2 = [\sum(w(F_o^2 - F_c^2)^2) / \sum [(F_o^2)^2]]^{1/2}$ .

**Table S11.** Selected bond lengths (Å) and bond angles (°) of complex **1**.

| Bond lengths(Length/Å) |            |                  |            |
|------------------------|------------|------------------|------------|
| Pd(1)—Cl(1)            | 2.3092(4)  | N(1)—C(1)        | 1.3696(19) |
| Pd(1)—N(1)             | 1.9774(12) | N(1)—C(13)       | 1.374(2)   |
| Pd(1)—N(3)             | 2.0190(12) | N(2)—C(18)       | 1.381(2)   |
| Pd(1)—N(5)             | 2.0191(13) | N(3)—C(19)       | 1.4469(19) |
| N2—N3                  | 1.2666(17) | N(4)—C(6)        | 1.378(2)   |
| N4—N5                  | 1.2701(19) | N(5)—C(7)        | 1.443(2)   |
| Bond angles(Angle/ °)  |            |                  |            |
| N(1)—Pd(1)—Cl(1)       | 179.18(4)  | N(1)—C(13)—C(14) | 120.94(15) |
| N(1)—Pd(1)—N(3)        | 88.81(5)   | N(1)—C(1)—C(2)   | 121.02(15) |

|                  |            |                  |            |
|------------------|------------|------------------|------------|
| N(1)—Pd(1)—N(5)  | 87.59(5)   | C(19)—N(3)—Pd(1) | 121.02(9)  |
| N(3)—Pd(1)—Cl(1) | 91.99(4)   | C(7)—N(5)—Pd(1)  | 120.63(10) |
| N(3)—Pd(1)—N(5)  | 176.39(5)  | N(3)—N(2)—C(18)  | 121.40(13) |
| N(5)—Pd(1)—Cl(1) | 91.62(4)   | N(3)—N(2)—C(19)  | 112.10(12) |
| C(1)—N(1)—Pd(1)  | 119.15(10) | N(5)—N(4)—C(6)   | 121.25(14) |
| C(13)—N(1)—Pd(1) | 118.99(10) | N(4)—N(5)—C(7)   | 113.05(13) |
| N(2)—N(3)—Pd(1)  | 126.74(10) | C(1)—N(1)—C(13)  | 121.81(13) |
| N(4)—N(5)—Pd(1)  | 126.16(11) | C(1)—C(2)—C(3)   | 121.16(18) |

**Table S12.** Conversion of benzyl alcohol to benzaldehyde in presence of air.

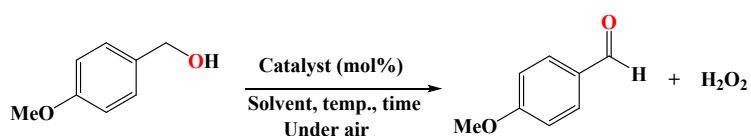

| S.N. | Catalysts/mol% | Solvent        | Temp.      | Time(h)   | Yields(%) |
|------|----------------|----------------|------------|-----------|-----------|
| 1.   | 1/0.1          | Toluene        | 50         | 12        | 70        |
| 2    | 1/0.1          | Toluene        | 50         | 24        | 86        |
| 3    | 1/0.1          | Toluene        | 100        | 12        | 90        |
| 4    | <b>1/0.1</b>   | <b>Toluene</b> | <b>100</b> | <b>24</b> | <b>99</b> |
| 5    | 1/0.01         | Toluene        | 100        | 24        | 56        |
| 6.   | 1/0.05         | Toluene        | 100        | 24        | 85        |
| 7.   | 1/0.2          | Toluene        | 100        | 24        | 99        |
| 8.   | 1/0.5          | Toluene        | 100        | 24        | 99        |
| 9.   | 1/1.0          | Toluene        | 100        | 24        | 99        |
| 10.  | 1/0.1          | THF            | 100        | 12        | 58        |
| 11.  | 1/0.1          | Xylene         | 100        | 24        | 61        |
| 12.  | 1/0.1          | Benzene        | 100        | 24        | 65        |
| 13.  | 1/0.1          | DMSO           | 100        | 24        | 35        |
| 14.  | 1/0.1          | Ethanol        | 100        | 24        | 22        |
| 15.  | 1/0.1          | DMF            | 100        | 24        | 33        |

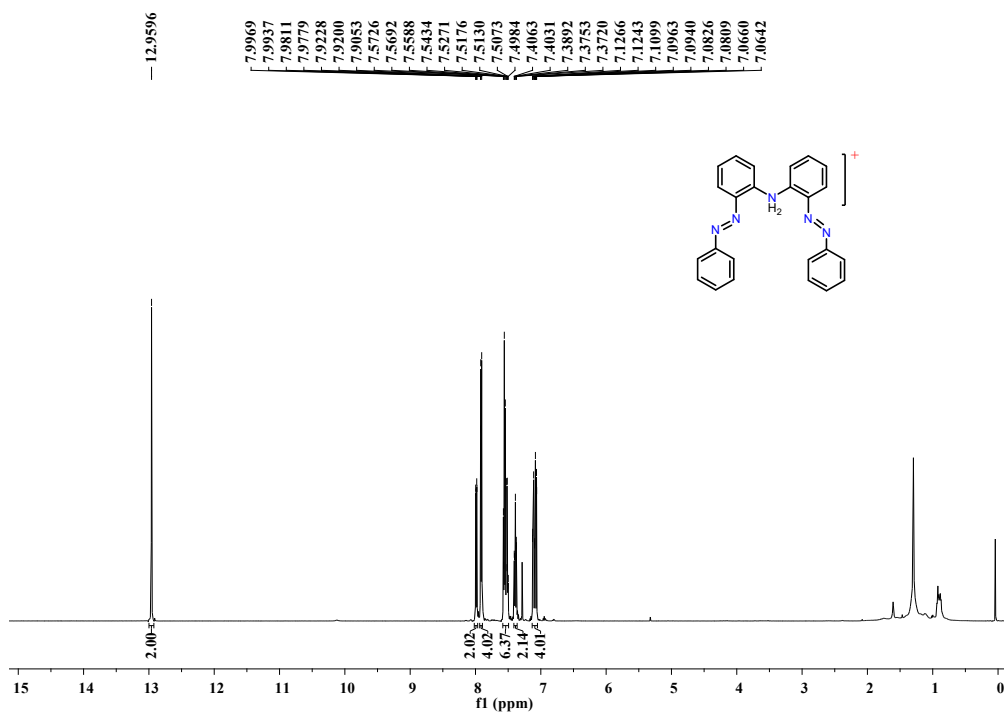

Figure S7.  $^1H$  NMR spectrum of ligand  $[LH_2]^+$  in  $CDCl_3$  (500 MHz).

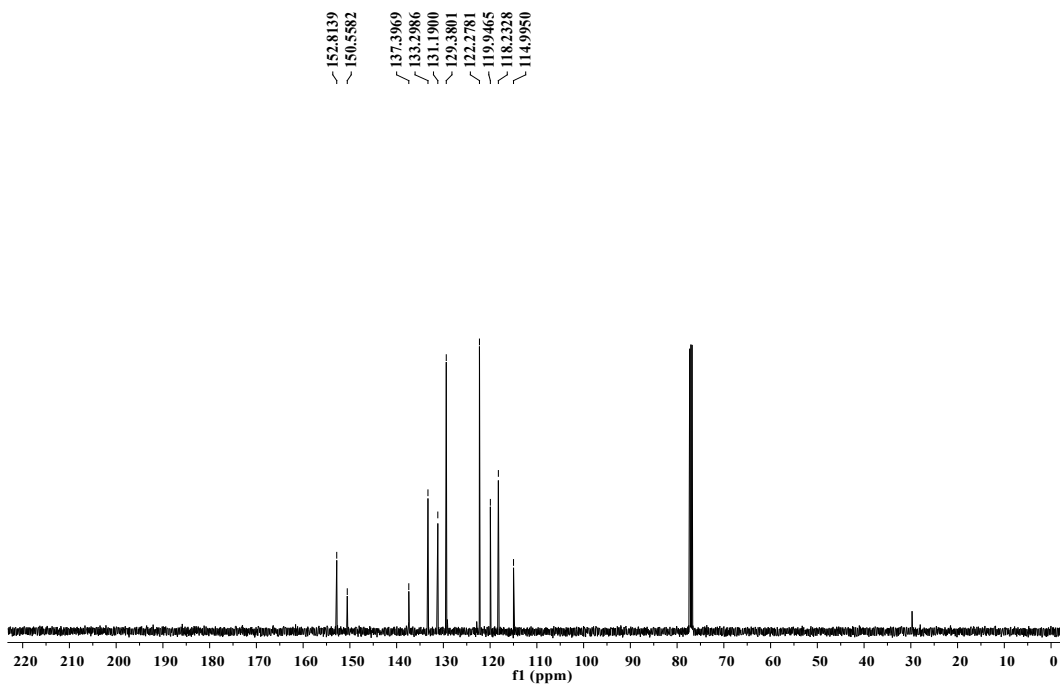

Figure S8.  $^{13}C$  NMR spectrum of ligand  $[LH_2]^+$  in  $CDCl_3$  (500 MHz).

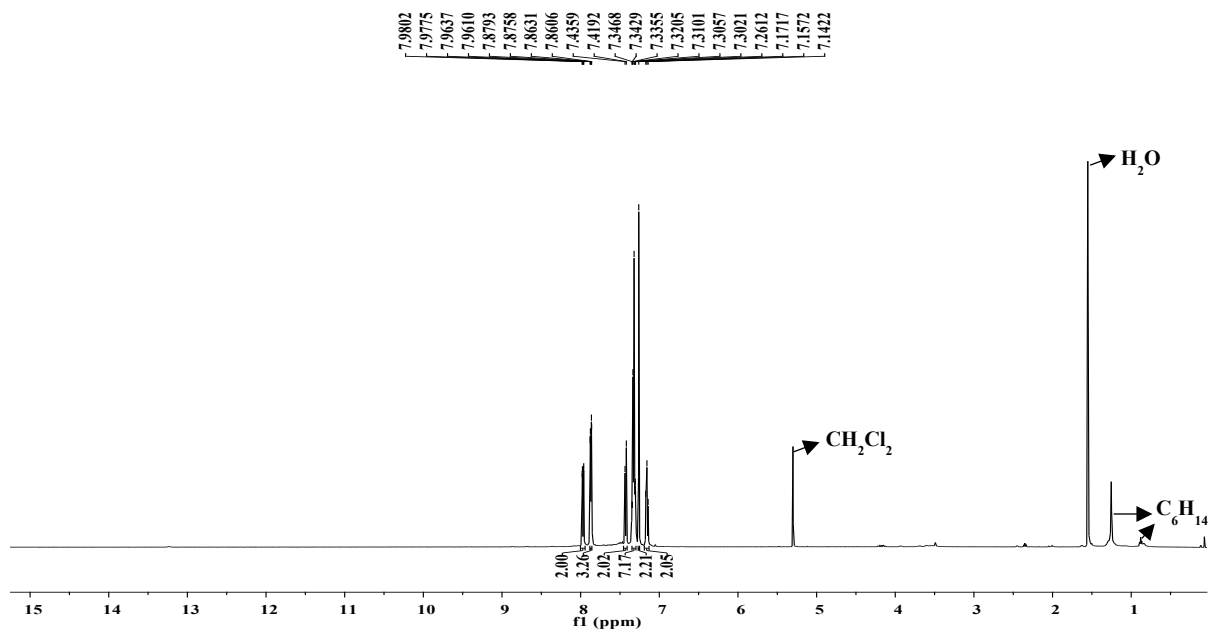

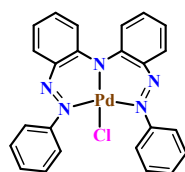

Figure S9.  $^1\text{H}$  NMR spectrum of complex  $[\text{Pd}(\text{L})\text{Cl}]$  in  $\text{CDCl}_3$  (500 MHz).

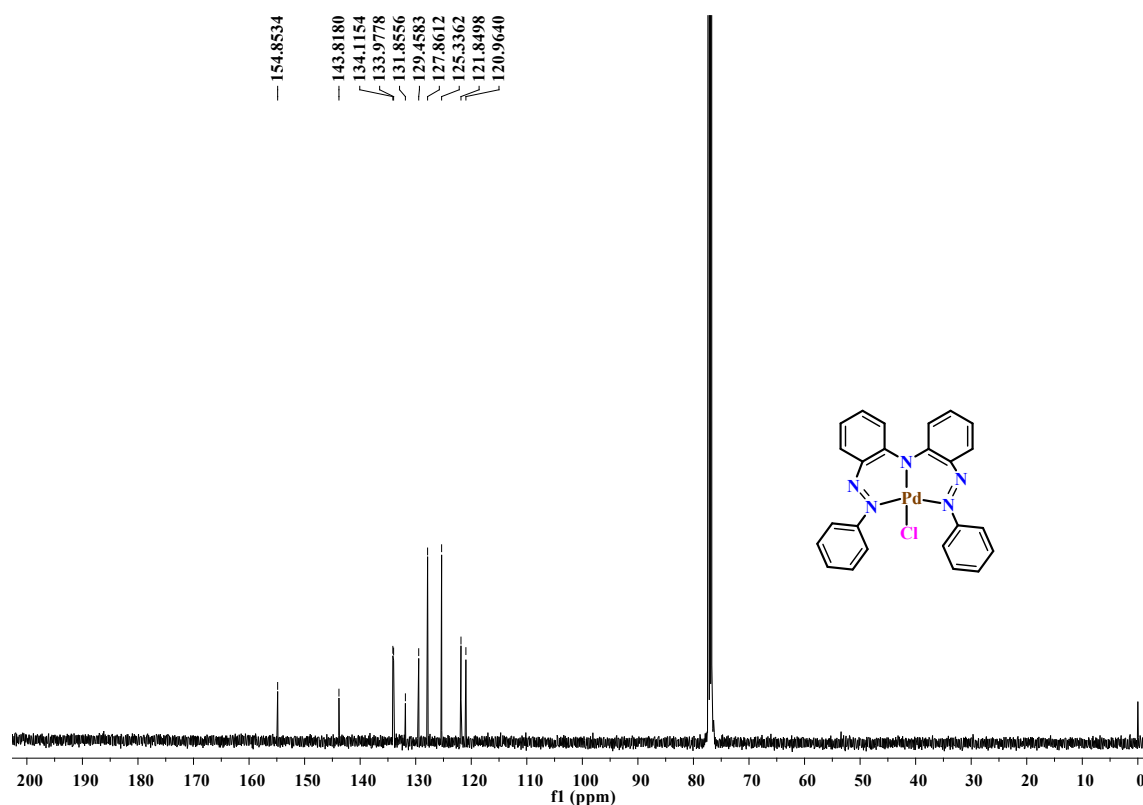

Figure S10.  $^{13}\text{C}$  NMR spectrum of complex  $[\text{Pd}(\text{L})\text{Cl}]$  in  $\text{CDCl}_3$  (500 MHz).

#### NMR data of desired N-alkylated products-

##### N-(4-methoxybenzyl)aniline (3a).

Purified by silica gel column chromatography;  $^1\text{H}$  NMR (500 MHz,  $\text{CDCl}_3$ )  $\delta$  7.23 (d,  $J = 8.6$  Hz, 2H), 7.17 – 7.10 (m, 2H), 6.83 (d,  $J = 8.6$  Hz, 2H), 6.68 (t,  $J = 7.3$  Hz, 1H), 6.58 (d,  $J = 7.7$  Hz, 2H), 4.18 (s, 2H), 3.87 (s, 1H), 3.73 (s, 3H);  $^{13}\text{C}$

NMR (126 MHz, CDCl<sub>3</sub>) δ 158.98 (s), 148.37 (s), 131.58 (s), 129.39 (s), 128.92 (s), 117.59 (s), 115.00 (s), 114.15 (s), 112.98 (s), 55.38 (s), 47.86 (s).

**N-(3-nitrobenzyl)aniline (3b).**

Purified by silica gel column chromatography; <sup>1</sup>H NMR (500 MHz, CDCl<sub>3</sub>) δ 7.97 (s, 1H), 7.87 (m, 1H), 7.53 (d, *J* = 6.2 Hz, 2H), 7.23 (t, *J* = 7.9 Hz, 2H), 6.77 (t, *J* = 7.3 Hz, 1H), 6.70 (d, *J* = 7.7 Hz, 2H), 4.47 (s, 2H), 4.19 (br s, 1H); <sup>13</sup>C NMR (126 MHz, CDCl<sub>3</sub>) δ 152.99 (s), 147.98 (s), 140.87 (s), 130.02 (s), 129.42 (s), 129.33 (s), 122.03 (s), 121.57 (s), 117.78 (s), 112.97 (s), 48.11 (s).

**4-chloro-N-(4-chlorobenzyl)aniline (3c).**

Purified by silica gel column chromatography; <sup>1</sup>H NMR (500 MHz, CDCl<sub>3</sub>) δ 7.33 (q, *J* = 8.6 Hz, 4H), 7.14 (d, *J* = 8.9 Hz, 2H), 6.55 (d, *J* = 8.9 Hz, 2H), 4.31 (s, 2H), 4.13 (s, 1H); <sup>13</sup>C NMR (126 MHz, CDCl<sub>3</sub>) δ 146.36 (s), 137.52 (s), 133.06 (s), 129.14 (s), 128.86 (s), 128.65 (s), 122.40 (s), 114.02 (s), 47.67 (s).

**N-(4-chlorobenzyl)-2-methoxyaniline (3d).**

Purified by silica gel column chromatography; <sup>1</sup>H NMR (500 MHz, CDCl<sub>3</sub>) δ 7.24 (s, 4H), 6.79 (td, *J* = 7.7, 1.2 Hz, 1H), 6.74 (dd, *J* = 7.9, 1.0 Hz, 1H), 6.65 (td, *J* = 7.8, 1.4 Hz, 1H), 6.48 (dd, *J* = 7.8, 1.2 Hz, 1H), 4.62 (s, 1H), 4.25 (s, 2H), 3.79 (s, 3H); <sup>13</sup>C NMR (126 MHz, CDCl<sub>3</sub>) δ 146.93 (s), 138.35 (s), 137.93 (s), 132.83 (s), 128.83 (s), 128.80 (s), 121.41 (s), 117.03 (s), 110.24 (s), 109.58 (s), 55.51 (s), 47.41 (s).

**2-fluoro-N-(4-fluorobenzyl)aniline (3e).**

Purified by silica gel column chromatography; <sup>1</sup>H NMR (500 MHz, CDCl<sub>3</sub>) δ 7.36 (dd, *J* = 8.6, 5.4 Hz, 2H), 7.31 (dd, *J* = 7.9, 1.4 Hz, 1H), 7.16 – 7.10 (m, 1H), 7.07 (t, *J* = 8.7 Hz, 2H), 6.68 (td, *J* = 7.7, 1.4 Hz, 1H), 6.63 (dd, *J* = 8.1, 1.2 Hz, 1H), 4.75 (s, 1H), 4.41 (s, 2H); <sup>13</sup>C NMR (126 MHz, CDCl<sub>3</sub>) δ 163.13 (s), 161.18 (s), 143.69 (s), 134.44 (s), 129.17 (s), 128.78 (s), 127.81 (s), 119.22 (s), 117.63 (s), 115.66 (s), 115.49 (s), 111.52 (s), 47.21 (s).

**N-(thiophen-2-ylmethyl)aniline (3f).**

Purified by silica gel column chromatography; <sup>1</sup>H NMR (500 MHz, CDCl<sub>3</sub>) δ 7.37 – 7.24 (m, 3H), 7.15 – 7.03 (m, 2H), 6.93 – 6.83 (m, 1H), 6.78 (d, *J* = 7.9 Hz, 2H), 4.59 (s, 2H), 4.12 (s, 1H); <sup>13</sup>C NMR (126 MHz, CDCl<sub>3</sub>) δ 147.74 (s), 143.12 (s), 129.41 (s), 126.99 (s), 125.14 (s), 124.70 (s), 118.19 (s), 113.29 (s), 43.58 (s).

**N-(furan-2-ylmethyl)aniline (3g).**

Purified by silica gel column chromatography; <sup>1</sup>H NMR (500 MHz, CDCl<sub>3</sub>) δ 7.36 (s, 1H), 7.23 – 7.12 (m, 2H), 6.74 (t, *J* = 7.3 Hz, 1H), 6.67 (d, *J* = 7.7 Hz, 2H), 6.32 (dd, *J* = 3.1, 1.9 Hz, 1H), 6.23 (d, *J* = 3.1 Hz, 1H), 4.31 (s, 2H), 4.01 (s, 1H); <sup>13</sup>C NMR (126 MHz, CDCl<sub>3</sub>) δ 152.77 (s), 147.65 (s), 141.93 (s), 129.25 (s), 118.05 (s), 113.18 (s), 110.34 (s), 106.99 (s), 41.47 (s).

**N-(pyridin-2-ylmethyl)aniline (3h).**

Purified by silica gel column chromatography; <sup>1</sup>H NMR (500 MHz, CDCl<sub>3</sub>) δ 8.62 (d, *J* = 4.8 Hz, 1H), 7.65 (td, *J* = 7.7, 1.6 Hz, 1H), 7.36 (d, *J* = 7.8 Hz, 1H), 7.24 – 7.09 (m, 3H), 6.77 (t, *J* = 7.3 Hz, 1H), 6.71 (dd, *J* = 8.5, 0.8 Hz, 2H), 4.80 (s, 1H), 4.49 (s, 2H); <sup>13</sup>C NMR (126 MHz, CDCl<sub>3</sub>) δ 158.63 (s), 149.21 (s), 147.97 (s), 136.69 (s), 129.30 (s), 122.14 (s), 121.63 (s), 117.61 (s), 113.09 (s), 49.32 (s).

**N-(2-bromobenzyl)pyridin-2-amine (3i).**

Purified by silica gel column chromatography; <sup>1</sup>H NMR (500 MHz, CDCl<sub>3</sub>) δ 8.12 (d, *J* = 3.9 Hz, 1H), 7.58 (d, *J* = 7.0 Hz, 1H), 7.46 – 7.39 (m, 2H), 7.27 (t, *J* = 6.9 Hz, 1H), 7.15 (td, *J* = 7.8, 1.5 Hz, 1H), 6.66 – 6.56 (m, 1H), 6.38 (t, *J* = 10.0 Hz, 1H), 5.21 (s, 1H), 4.60 (d, *J* = 6.3 Hz, 2H); <sup>13</sup>C NMR (126 MHz, CDCl<sub>3</sub>) δ 158.45 (s), 148.25 (s), 138.13 (s), 137.55 (s), 132.80 (s), 129.22 (s), 128.74 (s), 127.56 (s), 123.41 (s), 113.34 (s), 106.84 (s), 46.42 (s).

**N-(naphthalen-1-ylmethyl)pyridin-2-amine (3j).**

Purified by silica gel column chromatography; <sup>1</sup>H NMR (500 MHz, CDCl<sub>3</sub>) δ 8.06 (d, *J* = 6.0 Hz, 1H), 8.02 – 7.95 (m, 1H), 7.87 – 7.79 (m, 1H), 7.74 (d, *J* = 8.2 Hz, 1H), 7.47 – 7.42 (m, 3H), 7.37 – 7.30 (m, 2H), 6.53 (t, *J* = 5.9 Hz, 1H), 6.28 (d, *J* = 8.4 Hz, 1H), 4.97 (br s, 1H), 4.84 (d, *J* = 5.4 Hz, 2H); <sup>13</sup>C NMR (126 MHz, CDCl<sub>3</sub>) δ 158.64 (s), 148.18 (s), 137.56 (s), 133.92 (s), 131.54 (s), 128.83 (s), 128.19 (s), 126.40 (s), 125.90 (s), 125.76 (s), 125.57 (s), 123.55 (s), 115.00 (s), 113.12 (s), 107.12 (s), 44.35 (s).

**N-benzylpyridin-2-amine (3k).**

Purified by silica gel column chromatography;  $^1\text{H}$  NMR (500 MHz,  $\text{CDCl}_3$ )  $\delta$  8.05 (d,  $J = 4.9$  Hz, 1H), 7.40 – 7.28 (m, 5H), 7.24 (t,  $J = 7.3$  Hz, 1H), 6.59 – 6.50 (m, 1H), 6.33 (d,  $J = 8.4$  Hz, 1H), 5.16 (s, 1H), 4.47 (d,  $J = 5.8$  Hz, 2H);  $^{13}\text{C}$  NMR (126 MHz,  $\text{CDCl}_3$ )  $\delta$  158.74 (s), 148.20 (s), 139.24 (s), 137.53 (s), 128.66 (s), 127.43 (s), 127.25 (s), 113.11 (s), 106.77 (s), 46.33 (s).

**N-(thiophen-2-ylmethyl)pyridin-2-amine (3l).**

Purified by silica gel column chromatography;  $^1\text{H}$  NMR (500 MHz,  $\text{CDCl}_3$ )  $\delta$  8.13 (d,  $J = 4.8$  Hz, 1H), 7.47 – 7.39 (m, 1H), 7.23 (dd,  $J = 5.1, 1.1$  Hz, 1H), 7.04 – 6.97 (m, 2H), 6.63 (dd,  $J = 6.7, 5.5$  Hz, 1H), 6.45 (d,  $J = 8.4$  Hz, 1H), 5.02 (s, 1H), 4.70 (d,  $J = 5.8$  Hz, 2H);  $^{13}\text{C}$  NMR (126 MHz,  $\text{CDCl}_3$ )  $\delta$  158.14 (s), 148.08 (s), 142.63 (s), 137.54 (s), 126.85 (s), 125.21 (s), 124.66 (s), 114.99 (s), 113.51 (s), 107.33 (s), 41.32 (s).

**N-(furan-2-ylmethyl)pyridin-2-amine (3m).**

Purified by silica gel column chromatography;  $^1\text{H}$  NMR (500 MHz,  $\text{CDCl}_3$ )  $\delta$  8.11 (d,  $J = 3.9$  Hz, 1H), 7.45 – 7.39 (m, 1H), 7.36 (s, 1H), 6.66 – 6.56 (m, 1H), 6.44 (d,  $J = 8.4$  Hz, 1H), 6.32 (dd,  $J = 2.9, 1.8$  Hz, 1H), 6.24 (d,  $J = 2.6$  Hz, 1H), 5.08 (s, 1H), 4.51 (d,  $J = 4.7$  Hz, 2H);  $^{13}\text{C}$  NMR (126 MHz,  $\text{CDCl}_3$ )  $\delta$  158.29 (s), 152.69 (s), 148.03 (s), 141.90 (s), 137.44 (s), 113.34 (s), 110.35 (s), 107.24 (s), 106.87 (s), 39.36 (s).

**N-(4-ethoxybenzyl)quinolin-8-amine (3n).**

Purified by silica gel column chromatography;  $^1\text{H}$  NMR (500 MHz,  $\text{CDCl}_3$ )  $\delta$  8.69 (dd,  $J = 4.1, 1.5$  Hz, 1H), 8.02 (dd,  $J = 8.3, 1.6$  Hz, 1H), 7.33 (dd,  $J = 10.2, 5.0$  Hz, 4H), 7.03 (d,  $J = 8.1$  Hz, 1H), 6.86 (d,  $J = 8.5$  Hz, 2H), 6.65 (d,  $J = 7.6$  Hz, 1H), 6.50 (s, 1H), 4.45 (d,  $J = 5.5$  Hz, 2H), 4.00 (q,  $J = 7.0$  Hz, 2H), 1.39 (t,  $J = 7.0$  Hz, 3H);  $^{13}\text{C}$  NMR (126 MHz,  $\text{CDCl}_3$ )  $\delta$  158.22 (s), 146.90 (s), 144.68 (s), 138.28 (s), 136.01 (s), 131.09 (s), 128.74 (s), 128.67 (s), 127.82 (s), 121.41 (s), 114.64 (s), 114.06 (s), 105.09 (s), 63.48 (s), 47.24 (s), 14.91 (s).

**N-(2-bromobenzyl)-3-methylpyridin-2-amine (3o).**

Purified by silica gel column chromatography;  $^1\text{H}$  NMR (500 MHz,  $\text{CDCl}_3$ )  $\delta$  8.06 (d,  $J = 5.0$  Hz, 1H), 7.58 (d,  $J = 7.9$  Hz, 1H), 7.48 (d,  $J = 7.6$  Hz, 1H), 7.30 – 7.24 (m, 2H), 7.15 (td,  $J = 7.7, 1.6$  Hz, 1H), 6.57 (dd,  $J = 7.1, 5.1$  Hz, 1H), 4.80 (d,  $J = 5.9$  Hz, 2H), 4.64 (s, 1H), 2.14 (s, 3H);  $^{13}\text{C}$  NMR (126 MHz,  $\text{CDCl}_3$ )  $\delta$  156.42 (s), 145.51 (s), 139.04 (s), 136.92 (s), 132.75 (s), 130.27 (s), 128.69 (s), 127.47 (s), 123.87 (s), 116.62 (s), 113.08 (s), 45.82 (s), 16.95 (s).

**3-methyl-N-(4-methylbenzyl)pyridin-2-amine (3p).**

Purified by silica gel column chromatography;  $^1\text{H}$  NMR (500 MHz,  $\text{CDCl}_3$ )  $\delta$  8.15 (d,  $J = 5.0$  Hz, 1H), 7.37 (d,  $J = 7.9$  Hz, 2H), 7.29 (d,  $J = 7.1$  Hz, 1H), 7.23 (d,  $J = 7.8$  Hz, 2H), 6.62 (dd,  $J = 7.1, 5.1$  Hz, 1H), 4.74 (d,  $J = 5.3$  Hz, 2H), 4.47 (br s, 1H), 2.43 (s, 3H), 2.12 (s, 3H);  $^{13}\text{C}$  NMR (126 MHz,  $\text{CDCl}_3$ )  $\delta$  156.80 (s), 145.53 (s), 137.06 (s), 136.90 (s), 136.81 (s), 129.36 (s), 127.97 (s), 116.61 (s), 112.92 (s), 45.71 (s), 21.20 (s), 17.02 (s).

**3-methyl-N-(thiophen-2-ylmethyl)pyridin-2-amine (3q).**

Purified by silica gel column chromatography;  $^1\text{H}$  NMR (500 MHz,  $\text{CDCl}_3$ )  $\delta$  8.12 (d,  $J = 4.3$  Hz, 1H), 7.27 (d,  $J = 7.1$  Hz, 1H), 7.23 (dd,  $J = 5.1, 1.2$  Hz, 1H), 7.07 (d,  $J = 2.5$  Hz, 1H), 6.99 (dd,  $J = 5.1, 3.5$  Hz, 1H), 6.61 (dd,  $J = 7.1, 5.1$  Hz, 1H), 4.91 (d,  $J = 5.5$  Hz, 2H), 4.51 (s, 1H), 2.10 (s, 3H);  $^{13}\text{C}$  NMR (126 MHz,  $\text{CDCl}_3$ )  $\delta$  156.21 (s), 145.40 (s), 143.22 (s), 137.02 (s), 126.77 (s), 125.46 (s), 124.69 (s), 116.81 (s), 113.35 (s), 40.71 (s), 16.92 (s).

**N-benzylpentan-1-amine (3r).**

Purified by silica gel column chromatography;  $^1\text{H}$  NMR (500 MHz,  $\text{CDCl}_3$ )  $\delta$  7.36 (d,  $J = 4.4$  Hz, 4H), 7.31 – 7.24 (m, 1H), 3.82 (s, 2H), 2.67 (t,  $J = 7.25$  Hz, 2H), 1.78 (s, 1H), 1.61 – 1.51 (m, 2H), 1.41 – 1.29 (m, 4H), 0.95 (t,  $J = 7.0$  Hz, 3H);  $^{13}\text{C}$  NMR (126 MHz,  $\text{CDCl}_3$ )  $\delta$  140.57 (s), 128.38 (s), 128.14 (s), 126.88 (s), 54.12 (s), 49.52 (s), 29.82 (s), 29.61 (s), 22.66 (s), 14.09 (s).

**N-(4-methylbenzyl)butan-1-amine (3s).**

Purified by silica gel column chromatography;  $^1\text{H}$  NMR (500 MHz,  $\text{CDCl}_3$ )  $\delta$  7.25 (d,  $J = 7.9$  Hz, 2H), 7.17 (d,  $J = 7.8$  Hz, 2H), 3.79 (s, 2H), 2.66 (t,  $J = 7.1$  Hz, 2H), 2.38 (s, 3H), 1.71 (s, 1H), 1.54 (dt,  $J = 14.8, 7.3$  Hz, 2H), 1.45 – 1.34 (m, 2H), 0.96 (t,  $J = 7.3$  Hz, 3H);  $^{13}\text{C}$  NMR (126 MHz,  $\text{CDCl}_3$ )  $\delta$  137.47 (s), 136.40 (s), 129.07 (s), 128.12 (s), 53.82 (s), 49.15 (s), 32.25 (s), 21.10 (s), 20.54 (s), 14.07 (s).

**N-(4-chlorobenzyl)butan-1-amine (3t).**

Purified by silica gel column chromatography;  $^1\text{H}$  NMR (500 MHz,  $\text{CDCl}_3$ )  $\delta$  7.33 – 7.18 (m, 4H), 3.72 (s, 2H), 2.68 – 2.50 (m, 2H), 1.71 (s, 1H), 1.51 – 1.43 (m, 2H), 1.34 (dt,  $J = 14.5, 7.3$  Hz, 2H), 0.91 (t,  $J = 7.3$  Hz, 3H);  $^{13}\text{C}$  NMR (126 MHz,  $\text{CDCl}_3$ )  $\delta$  139.04 (s), 132.49 (s), 129.41 (s), 128.42 (s), 53.28 (s), 49.10 (s), 32.19 (s), 20.46 (s), 14.00 (s).



**N-(4-fluorobenzyl)butan-1-amine (3u).**

Purified by silica gel column chromatography; <sup>1</sup>H NMR (500 MHz, CDCl<sub>3</sub>) δ 7.31 (dd, *J* = 8.5, 5.5 Hz, 2H), 7.00 (t, *J* = 8.7 Hz, 2H), 3.77 (s, 2H), 2.84 (s, 1H), 2.63 (t, *J* = 7.3 Hz, 2H), 1.52 (dt, *J* = 14.9, 7.4 Hz, 2H), 1.34 (dq, *J* = 14.6, 7.3 Hz, 2H), 0.91 (t, *J* = 7.4 Hz, 3H); <sup>13</sup>C NMR (126 MHz, CDCl<sub>3</sub>) δ 162.97 (s), 161.02 (s), 129.92 (s), 129.85 (s), 115.27 (s), 115.10 (s), 52.95 (s), 48.79 (s), 31.73 (s), 20.41 (s), 13.92 (s).

**N-isopentylaniline (3v).**

Purified by silica gel column chromatography; <sup>1</sup>H NMR (500 MHz, CDCl<sub>3</sub>) δ 7.21 (dd, *J* = 8.4, 7.4 Hz, 2H), 6.72 (t, *J* = 7.3 Hz, 1H), 6.64 (d, *J* = 7.7 Hz, 2H), 3.60 (s, 1H), 3.19 – 3.11 (m, 2H), 1.76 (tt, *J* = 13.3, 6.7 Hz, 1H), 1.55 (dd, *J* = 14.6, 7.0 Hz, 2H), 0.99 (d, *J* = 6.6 Hz, 6H); <sup>13</sup>C NMR (126 MHz, CDCl<sub>3</sub>) δ 148.58 (s), 129.23 (s), 117.11 (s), 112.71 (s), 42.16 (s), 38.62 (s), 26.02 (s), 22.63 (s).

**N,N'-(1,3-phenylenebis(methylene))dianiline (3w).**

Purified by silica gel column chromatography; <sup>1</sup>H NMR (500 MHz, CDCl<sub>3</sub>) δ 7.44 (s, 1H), 7.40 – 7.32 (m, 3H), 7.24 (t, *J* = 7.9 Hz, 4H), 6.79 (t, *J* = 7.3 Hz, 2H), 6.69 (d, *J* = 7.7 Hz, 4H), 4.37 (s, 4H), 4.08 (s, 2H); <sup>13</sup>C NMR (126 MHz, CDCl<sub>3</sub>) δ 148.16 (s), 139.99 (s), 129.32 (s), 128.99 (s), 126.63 (s), 126.44 (s), 117.67 (s), 112.94 (s), 48.32 (s).

**N<sup>1</sup>,N<sup>2</sup>-bis(4-chlorobenzyl)benzene-1,2-diamine (3x).**

Purified by silica gel column chromatography; <sup>1</sup>H NMR (500 MHz, CDCl<sub>3</sub>) δ 7.34 (s, 8H), 6.85 – 6.79 (m, 2H), 6.72 – 6.66 (m, 2H), 4.33 (s, 4H), 3.68 (s, 2H); <sup>13</sup>C NMR (126 MHz, CDCl<sub>3</sub>) δ 137.88 (s), 136.89 (s), 133.00 (s), 129.06 (s), 128.77 (s), 119.74 (s), 112.33 (s), 48.14 (s).

**(E)-2-(phenyldiazenyl)-N-(pyridin-2-ylmethyl)aniline (3y).**

Purified by silica gel column chromatography; <sup>1</sup>H NMR (400 MHz, CDCl<sub>3</sub>) δ 9.53 (t, *J* = 5.0 Hz, 3H), 8.64 – 8.60 (m, 3H), 7.91 – 7.89 (m, 4H), 7.88 (dd, *J* = 2.0, 1.3 Hz, 4H), 7.56 (d, *J* = 1.8 Hz, 3H), 7.46 (dd, *J* = 8.3, 7.0 Hz, 6H), 7.37 (d, *J* = 7.3 Hz, 3H), 7.26 (d, *J* = 7.9 Hz, 3H), 7.21 (s, 3H), 7.15 – 7.11 (m, 3H), 6.79 (s, 3H), 6.70 (dd, *J* = 8.4, 0.7 Hz, 3H), 4.62 (d, *J* = 5.4 Hz, 6H); <sup>13</sup>C NMR (101 MHz, CDCl<sub>3</sub>) δ 158.02 (s), 152.94 (s), 149.41 (s), 143.09 (s), 136.83 (d, *J* = 1.1 Hz), 132.84 (s), 130.89 (s), 129.89 (s), 129.21 (s), 122.29 (d, *J* = 8.0 Hz), 121.35 (s), 116.31 (s), 112.36 (s), 48.53 (s).

**2-chloro-6-(1-phenyl-2-(pyridin-2-ylmethyl)hydrazineyl)pyridine (3z)**

Purified by silica gel column chromatography; <sup>1</sup>H NMR (500 MHz, CDCl<sub>3</sub>) δ 8.53 (d, *J* = 4.8 Hz, 1H), 7.56 (td, *J* = 7.6, 1.7 Hz, 1H), 7.37 – 7.26 (m, 6H), 7.18 – 7.10 (m, 2H), 6.68 (dd, *J* = 20.9, 7.9 Hz, 2H), 5.93 (s, 1H), 4.26 (d, *J* = 2.3 Hz, 2H); <sup>13</sup>C NMR (126 MHz, CDCl<sub>3</sub>) δ 157.80 (s), 157.65 (s), 149.33 (s), 149.20 (s), 143.71 (s), 139.36 (s), 136.31 (s), 129.22 (s), 125.70 (s), 125.25 (s), 123.23 (s), 122.21 (s), 113.74 (s), 107.25 (s), 55.29 (s).

**1H-indole (4a).**

Purified by silica gel column chromatography; <sup>1</sup>H NMR (500 MHz, CDCl<sub>3</sub>) δ 8.08 (s), 7.65 (dd, *J* = 7.9, 0.9 Hz), 7.38 (dd, *J* = 8.1, 0.9 Hz), 7.22 – 7.17 (m), 7.15 – 7.10 (m), 6.55 (ddd, *J* = 3.1, 2.0, 0.9 Hz); <sup>13</sup>C NMR (126 MHz, CDCl<sub>3</sub>) δ 135.85 (s), 127.92 (s), 124.24 (s), 122.08 (s), 120.83 (s), 119.91 (s), 111.12 (s), 102.71 (s).

**5-methoxy-1H-indole (4b).**

Purified by silica gel column chromatography; <sup>1</sup>H NMR (500 MHz, CDCl<sub>3</sub>) δ 8.06 (s), 7.29 – 7.25 (m), 7.16 (t, *J* = 2.7 Hz), 7.14 (d, *J* = 2.5 Hz), 6.89 (dd, *J* = 8.8, 2.5 Hz), 6.50 (ddd, *J* = 3.1, 2.1, 0.9 Hz), 3.87 (s); <sup>13</sup>C NMR (126 MHz, CDCl<sub>3</sub>) δ 154.26 (s), 131.07 (s), 128.37 (s), 125.05 (s), 112.44 (s), 111.87 (s), 102.44 (s), 55.97 (s).

**6-chloro-1H-indole (4c).**

Purified by silica gel column chromatography; <sup>1</sup>H NMR (500 MHz, CDCl<sub>3</sub>) δ 8.13 (s), 7.54 (d, *J* = 8.4 Hz), 7.40 – 7.36 (m), 7.19 (dd, *J* = 3.1, 2.5 Hz), 7.09 (dd, *J* = 8.4, 1.8 Hz), 6.53 (ddd, *J* = 3.0, 2.0, 0.9 Hz); <sup>13</sup>C NMR (126 MHz, CDCl<sub>3</sub>) δ 136.20 (s), 127.94 (s), 126.51 (s), 124.93 (s), 121.64 (s), 120.67 (s), 111.05 (s), 102.87 (s).

**6-bromo-1H-indole (4d).**

Purified by silica gel column chromatography; <sup>1</sup>H NMR (500 MHz, CDCl<sub>3</sub>) δ 8.17 (s), 7.78 (d, *J* = 1.6 Hz), 7.29 – 7.23 (m), 7.21 – 7.18 (m), 6.49 (ddd, *J* = 3.0, 2.0, 0.8 Hz); <sup>13</sup>C NMR (126 MHz, CDCl<sub>3</sub>) δ 134.47 (s), 129.71 (s), 125.49 (s), 124.93 (s), 123.30 (s), 113.11 (s), 112.55 (s), 102.38 (s).

**(E)-1-(4-methoxyphenyl)-N-phenylmethanimine (2a'').**

<sup>1</sup>H NMR (500 MHz, CDCl<sub>3</sub>) δ 8.42 (s, 1H), 7.89 (d, *J* = 8.6 Hz, 2H), 7.43 (t, *J* = 7.7 Hz, 2H), 7.25 (t, *J* = 8.5 Hz, 3H), 7.02 (d, *J* = 8.6 Hz, 2H), 3.90 (s, 3H).

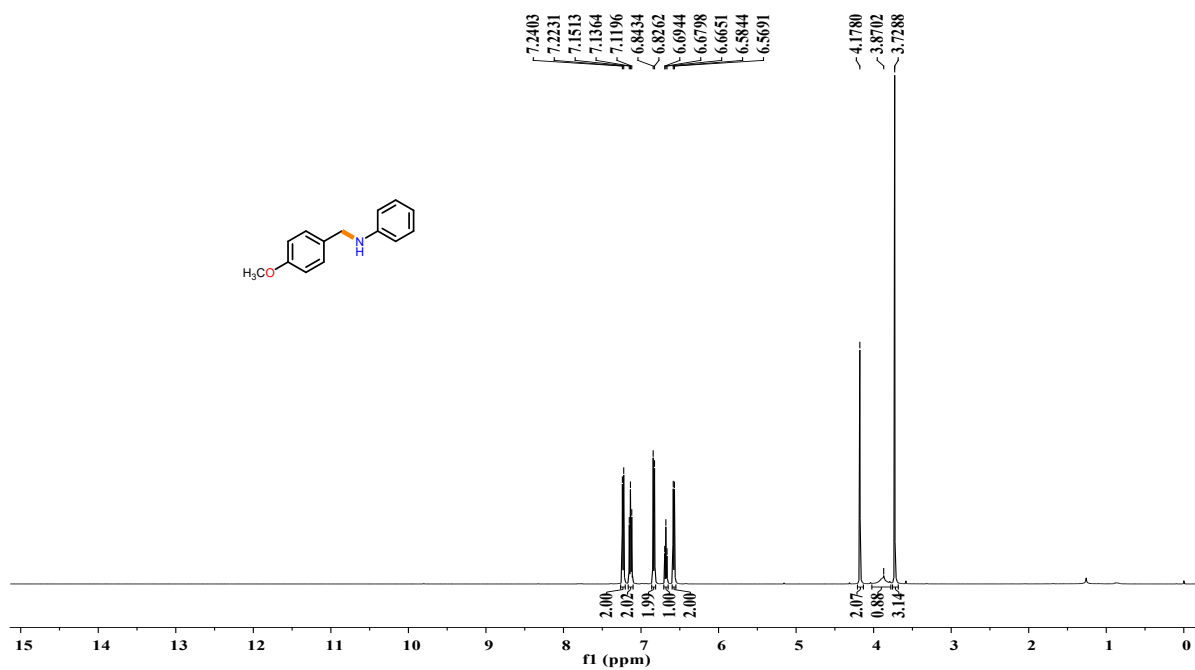

Figure S11. <sup>1</sup>H NMR spectrum of **3a** in CDCl<sub>3</sub> (500 MHz).

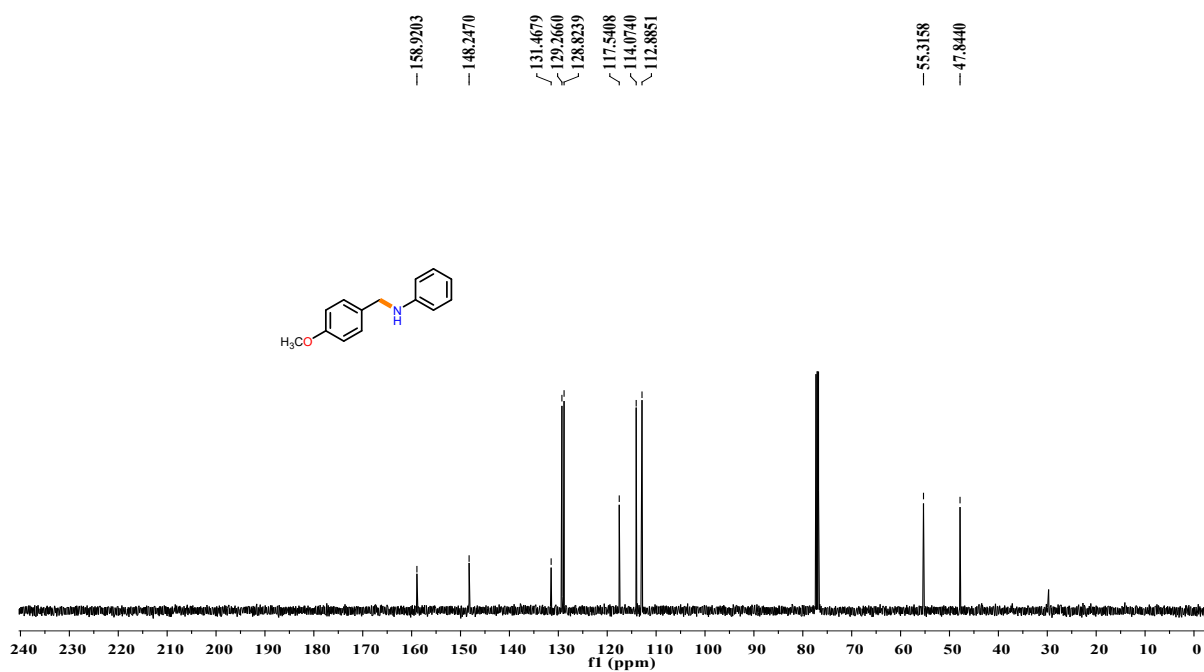

Figure S12. <sup>13</sup>C NMR spectrum of **3a** in CDCl<sub>3</sub> (500 MHz).

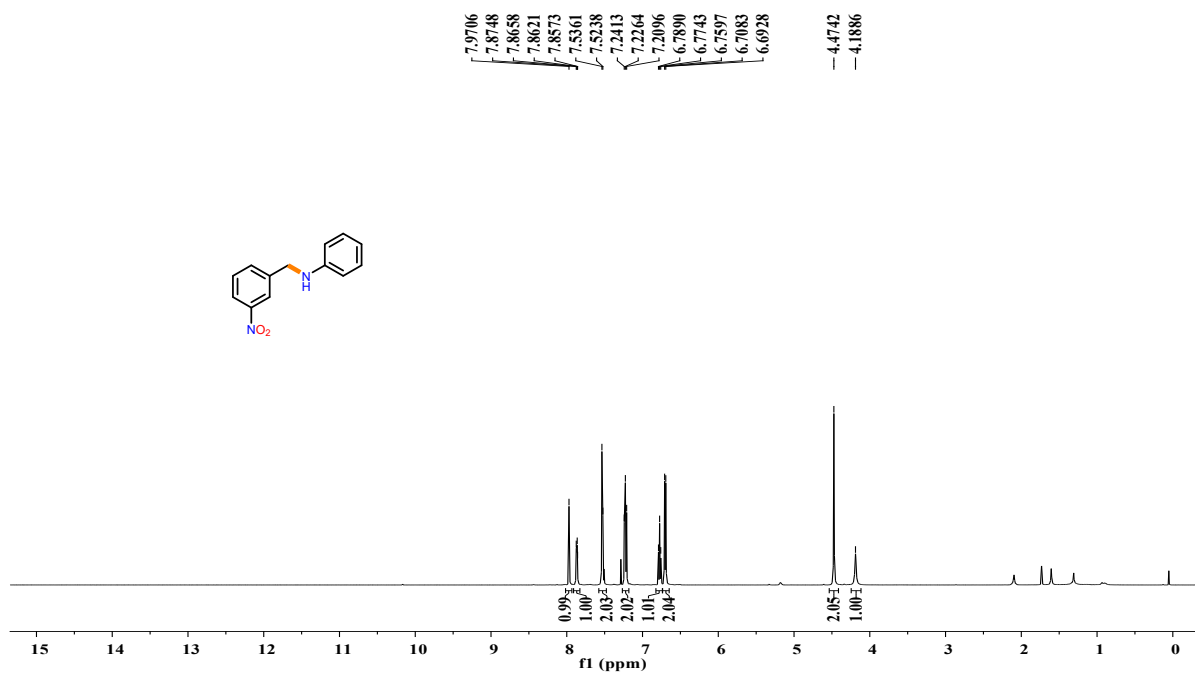

Figure S13. <sup>1</sup>H NMR spectrum of **3b** in CDCl<sub>3</sub> (500 MHz).

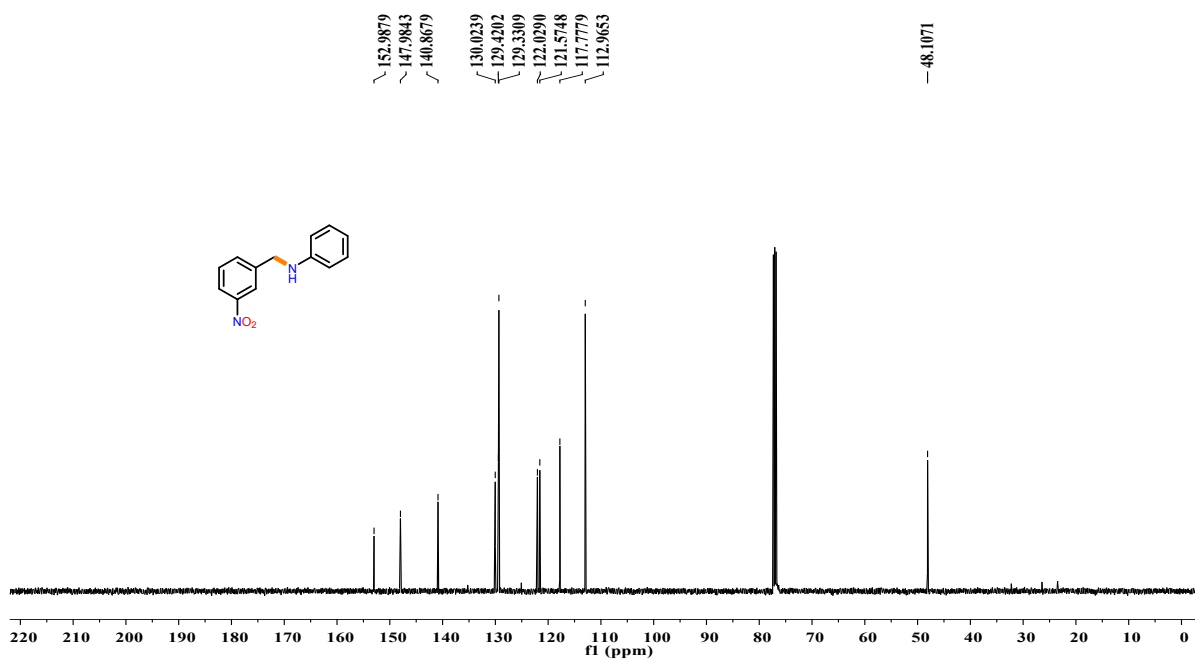

Figure S14. <sup>13</sup>C NMR spectrum of **3b** in CDCl<sub>3</sub> (500 MHz).

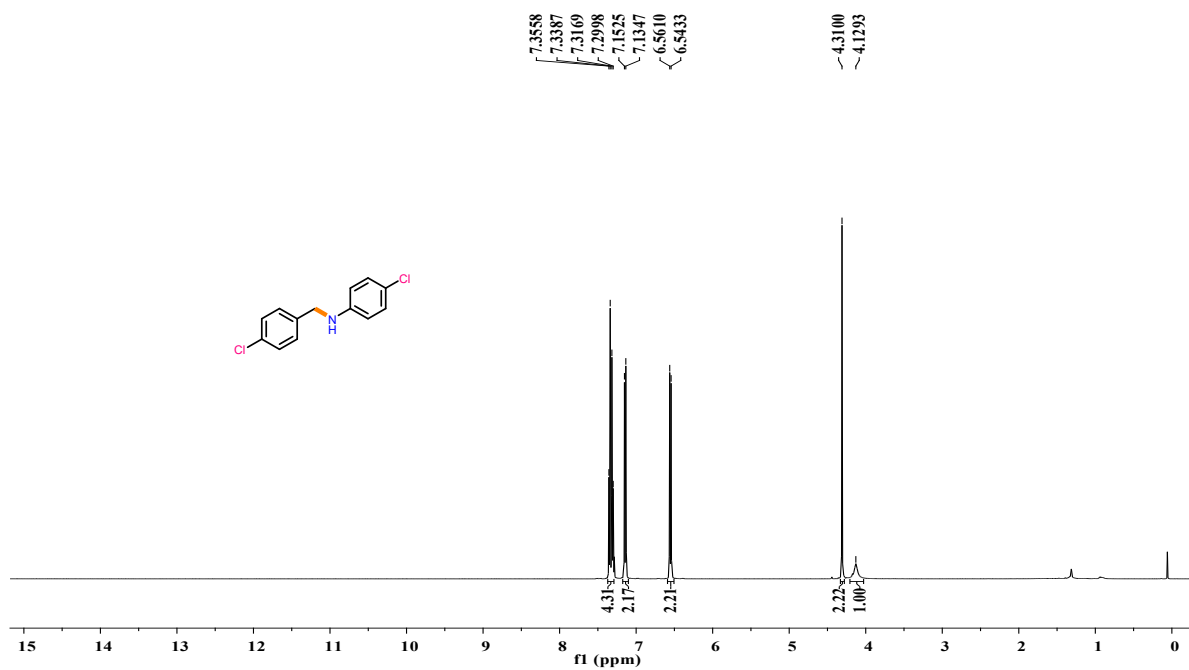

Figure S15. <sup>1</sup>H NMR spectrum of 3c in CDCl<sub>3</sub> (500 MHz).

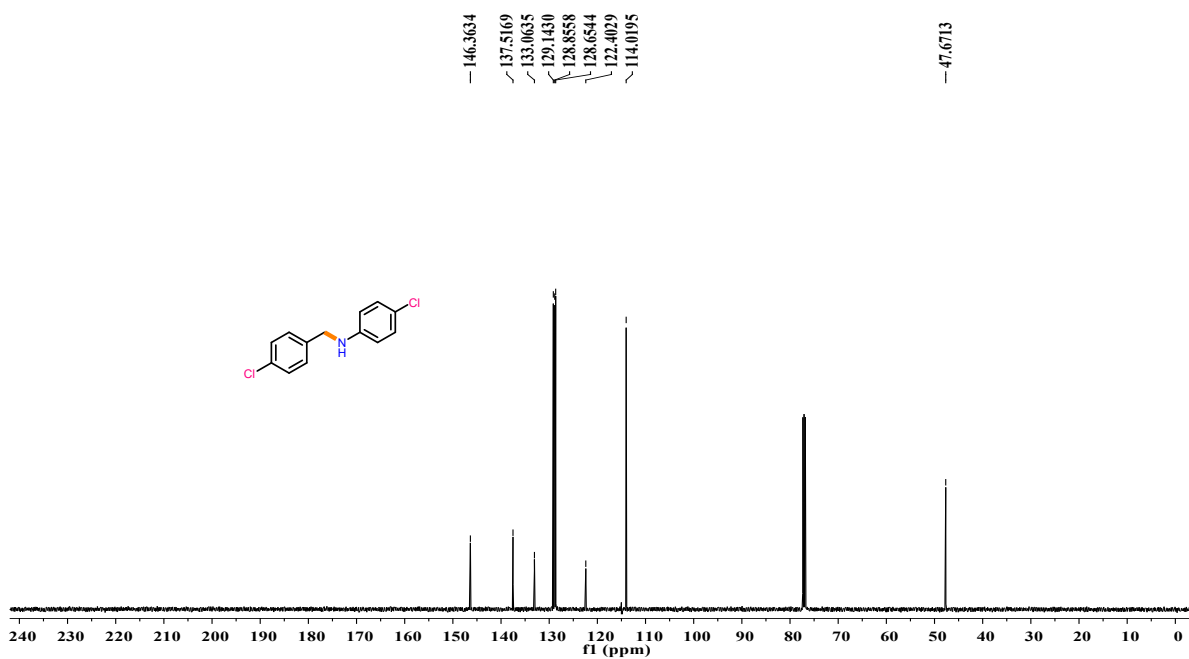

Figure S16. <sup>13</sup>C NMR spectrum of 3c in CDCl<sub>3</sub> (500 MHz).

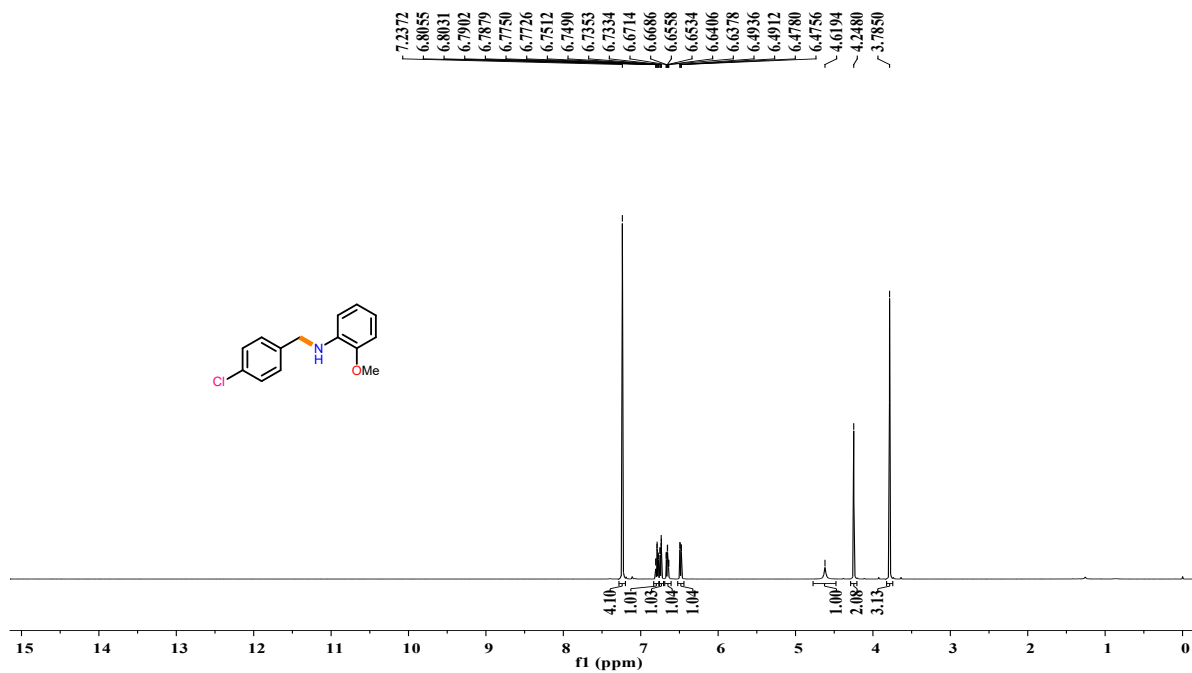

Figure S17. <sup>1</sup>H NMR spectrum of **3d** in CDCl<sub>3</sub> (500 MHz).

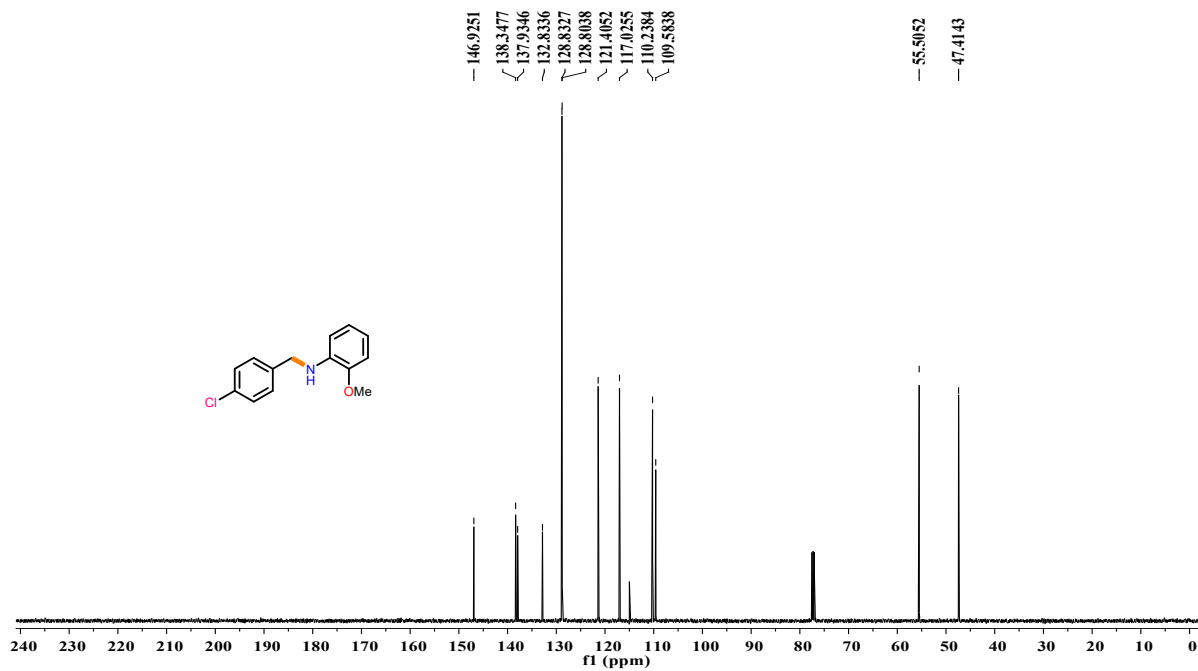

Figure S18. <sup>13</sup>C NMR spectrum of **3d** in CDCl<sub>3</sub> (500 MHz).

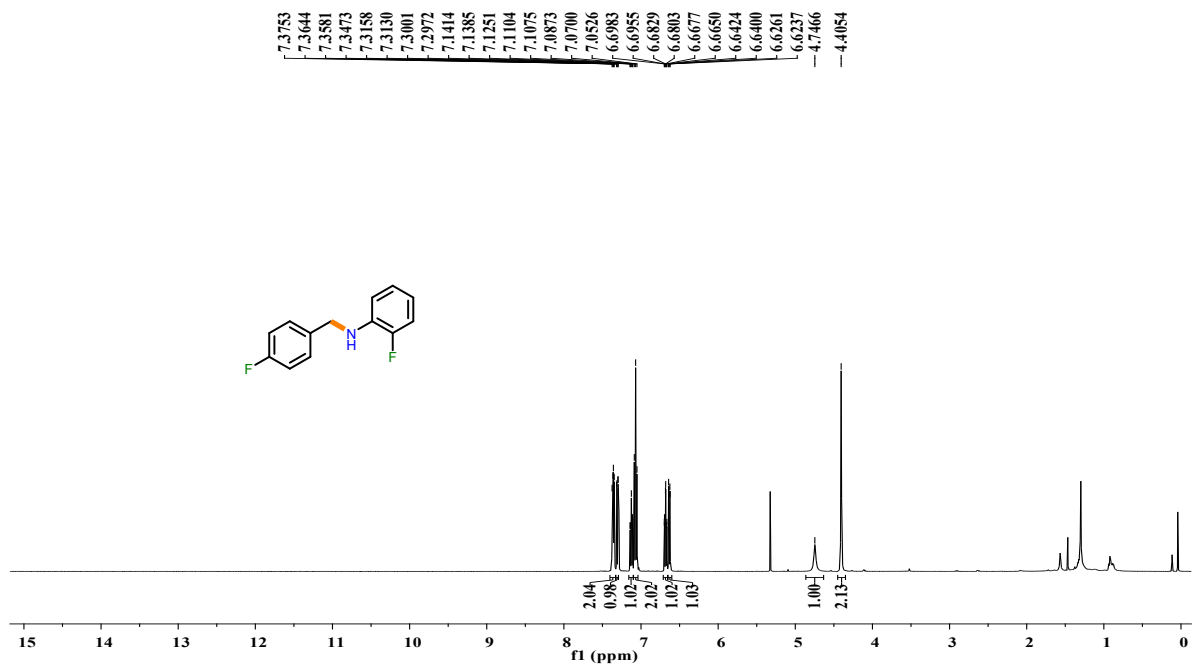

Figure S19. <sup>1</sup>H NMR spectrum of 3e in CDCl<sub>3</sub> (500 MHz).

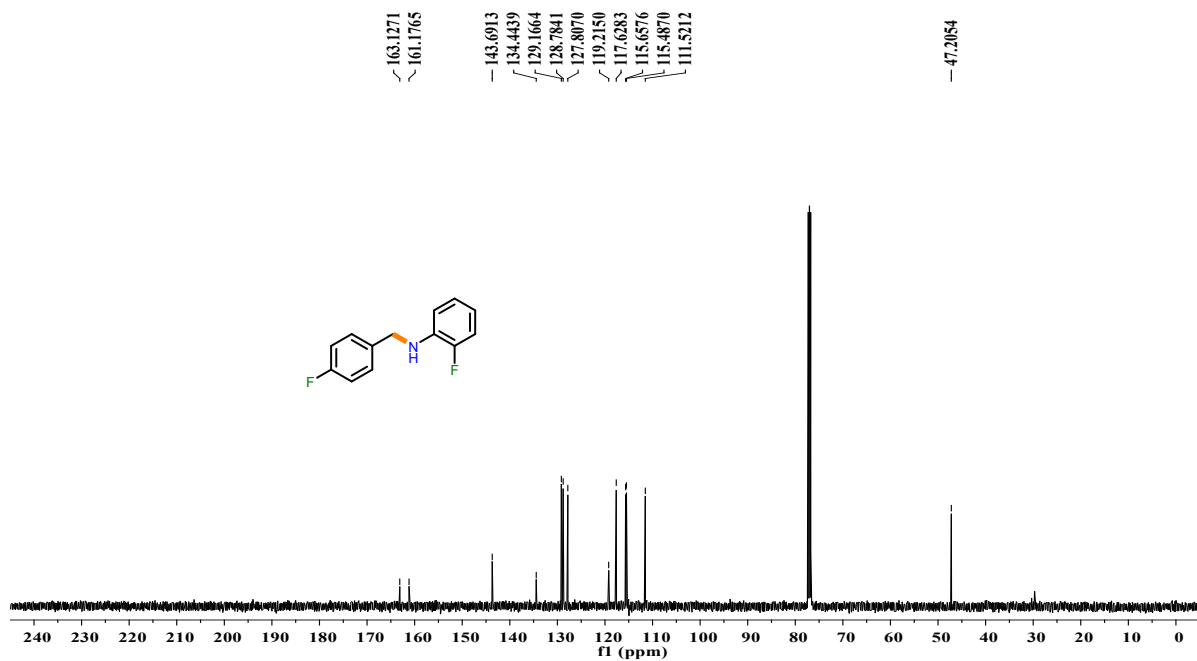

Figure S20. <sup>13</sup>C NMR spectrum of 3e in CDCl<sub>3</sub> (500 MHz).

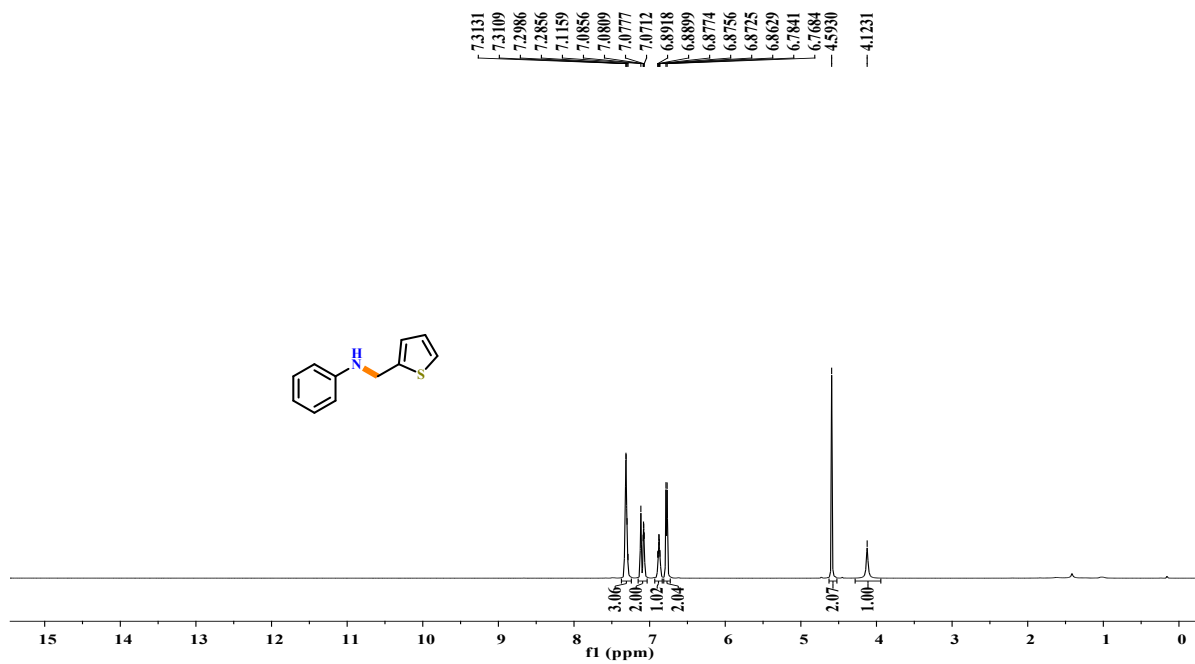

Figure S21. <sup>1</sup>H NMR spectrum of **3f** in CDCl<sub>3</sub> (500 MHz).

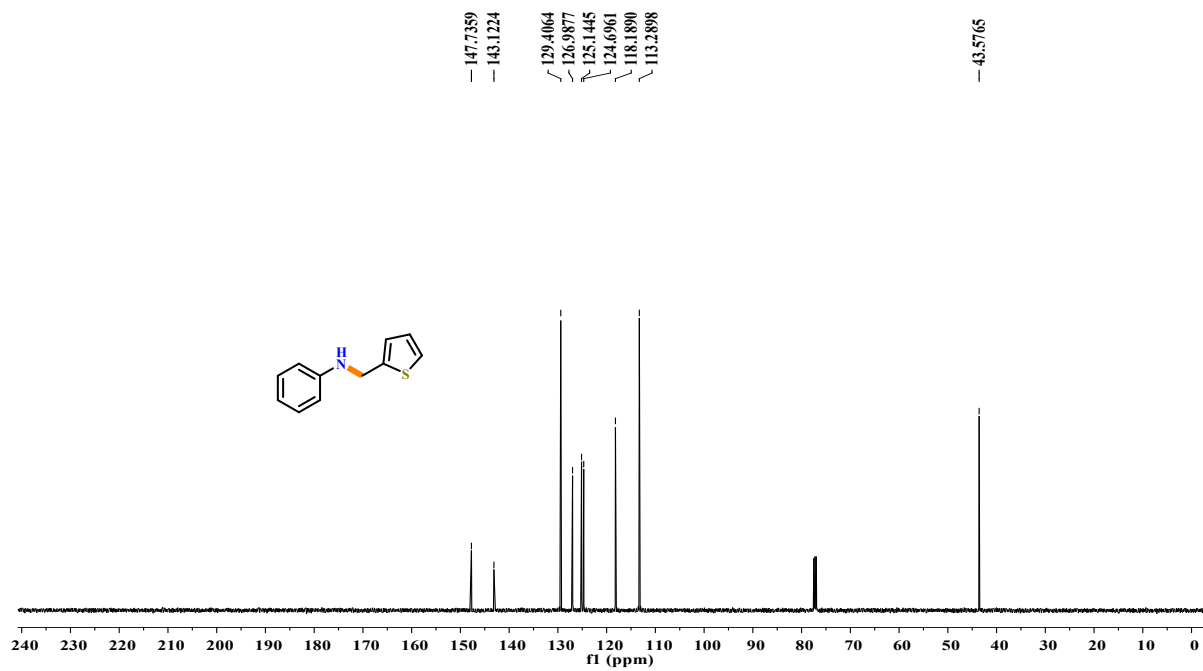

Figure S22. <sup>13</sup>C NMR spectrum of **3f** in CDCl<sub>3</sub> (500 MHz).

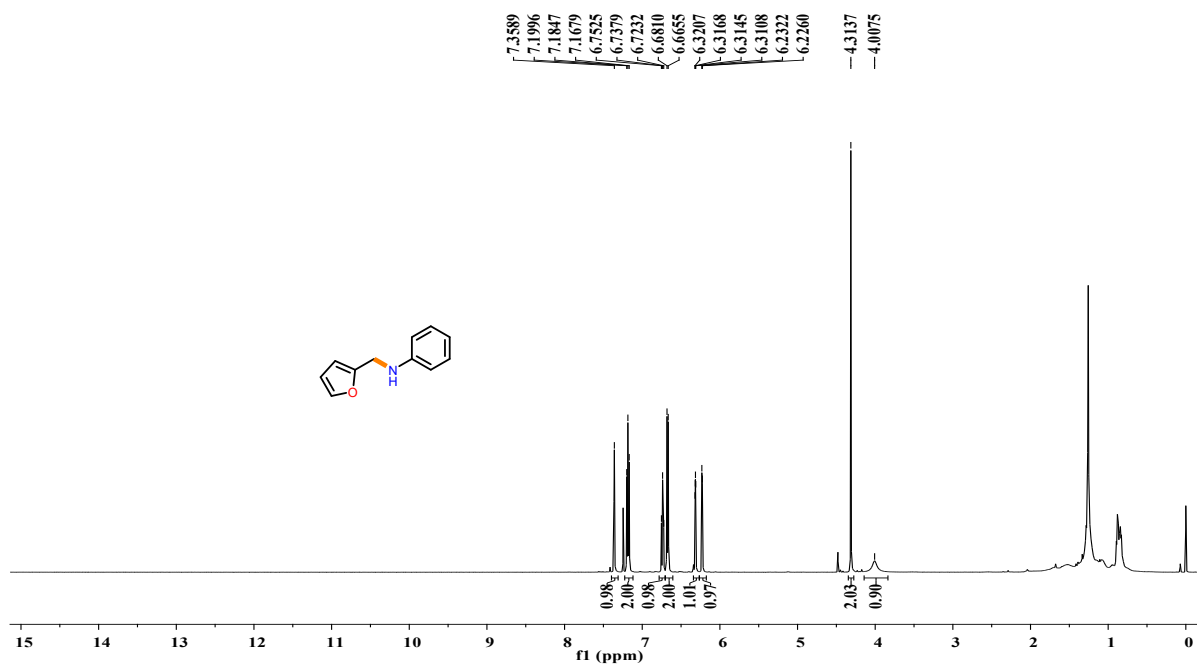

Figure S23. <sup>1</sup>H NMR spectrum of **3g** in CDCl<sub>3</sub> (500 MHz).

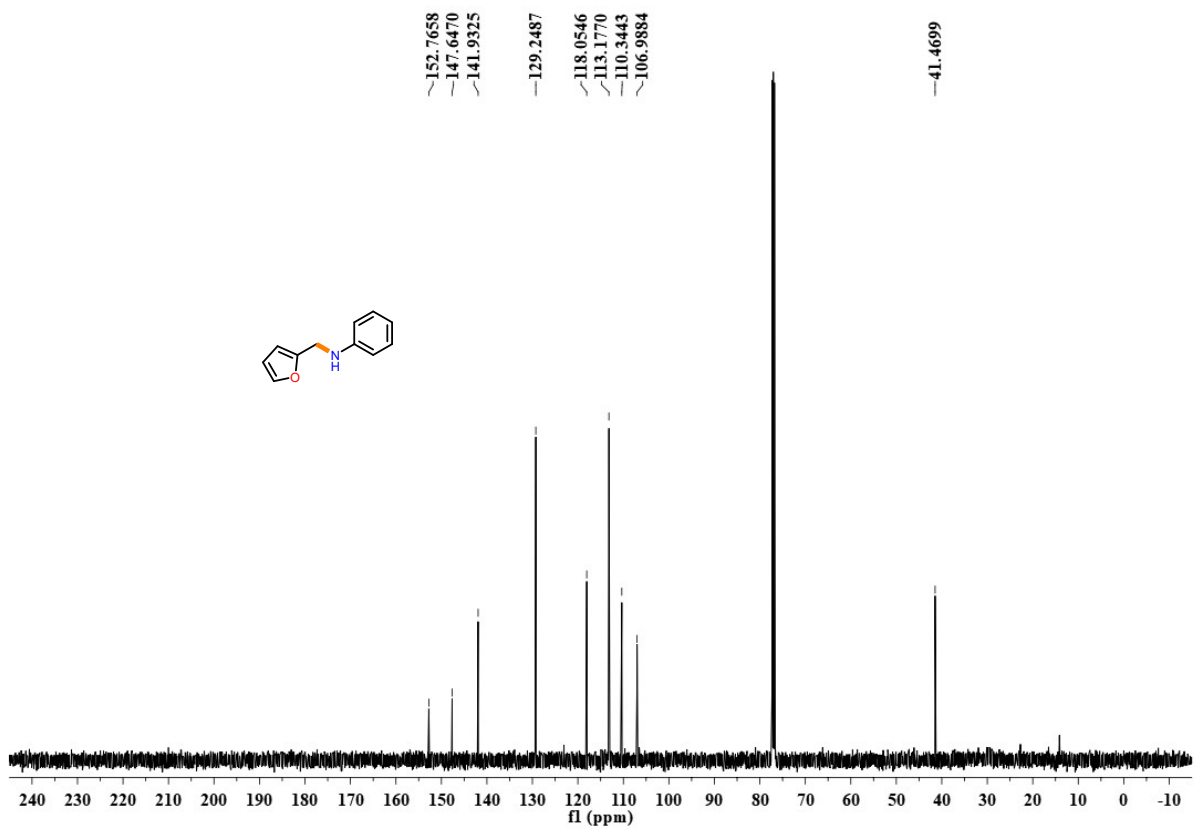

Figure S24. <sup>13</sup>C NMR spectrum of **3g** in CDCl<sub>3</sub> (500 MHz).



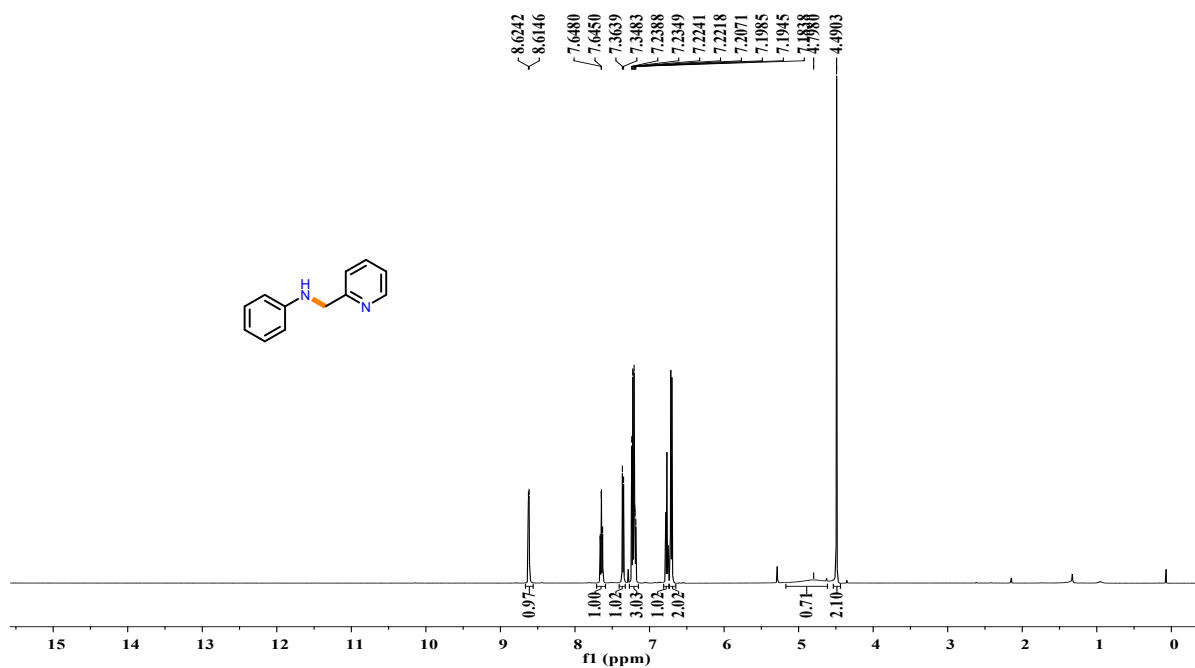

Figure S25. <sup>1</sup>H NMR spectrum of 3h in CDCl<sub>3</sub> (500 MHz).

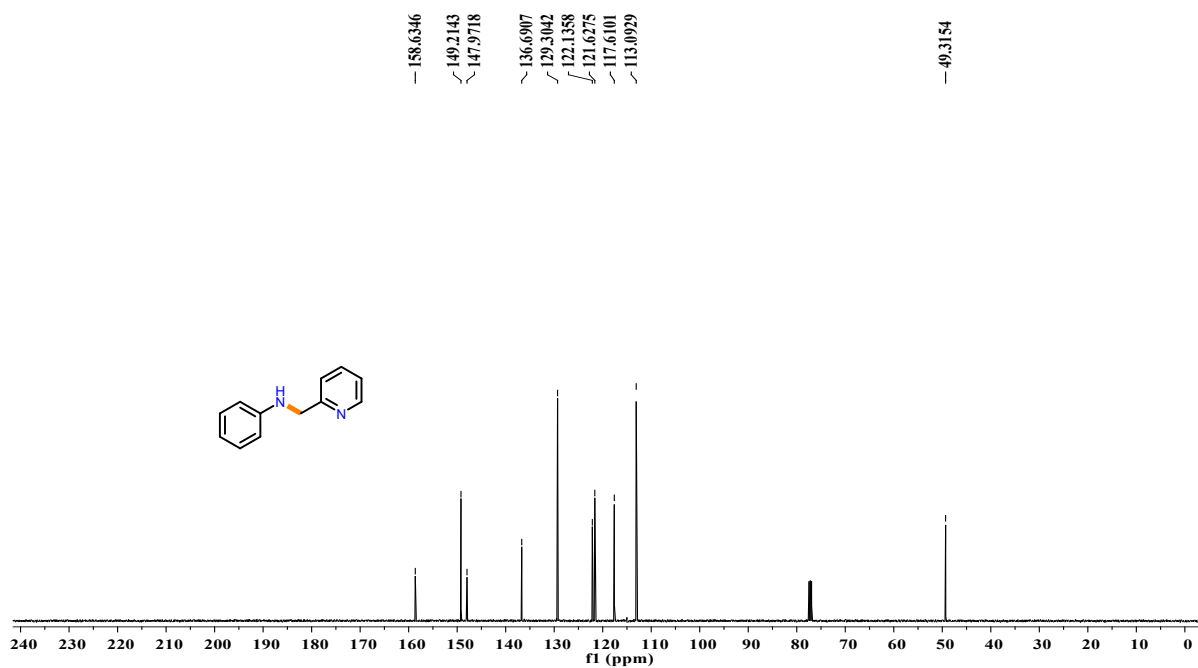

Figure S26. <sup>13</sup>C NMR spectrum of 3h in CDCl<sub>3</sub> (500 MHz).

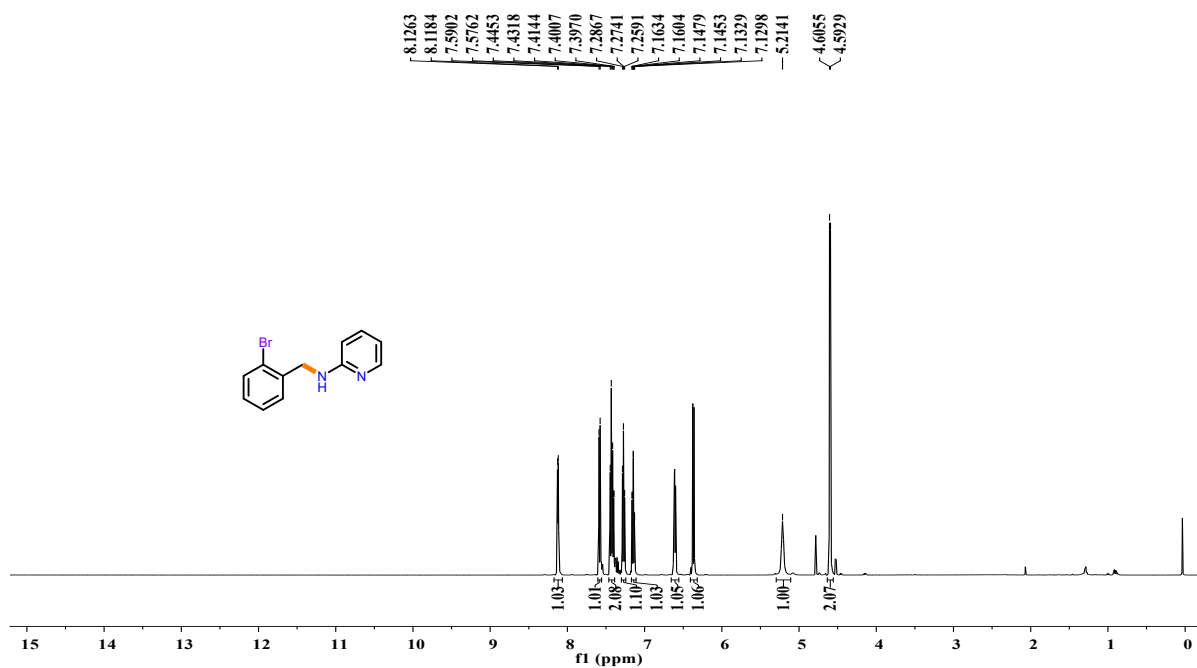

Figure S27. <sup>1</sup>H NMR spectrum of **3i** in CDCl<sub>3</sub> (500 MHz).

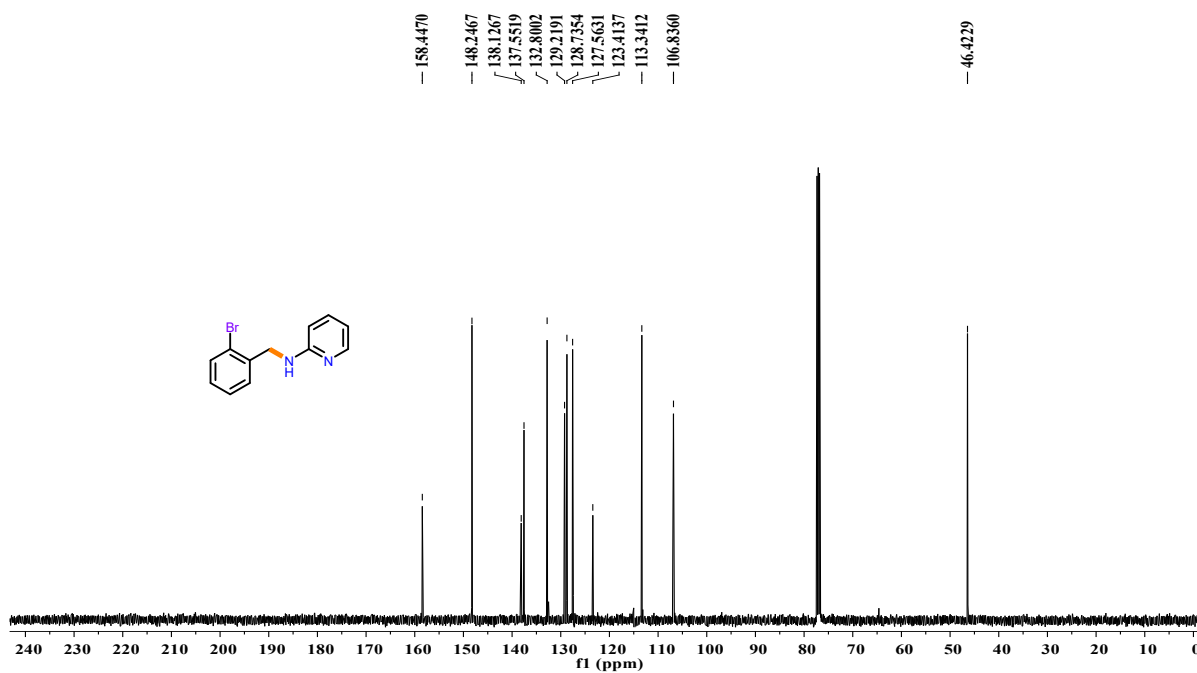

Figure S28. <sup>13</sup>C NMR spectrum of **3i** in CDCl<sub>3</sub> (500 MHz).

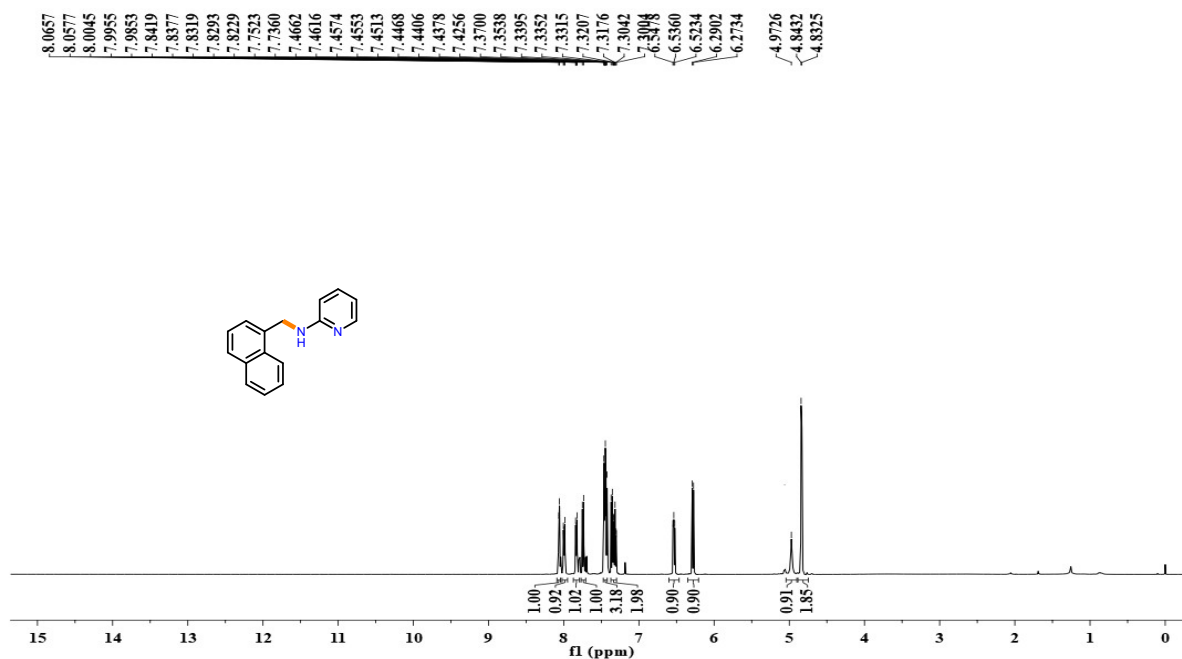

Figure S29. <sup>1</sup>H NMR spectrum of **3j** in CDCl<sub>3</sub> (500 MHz).

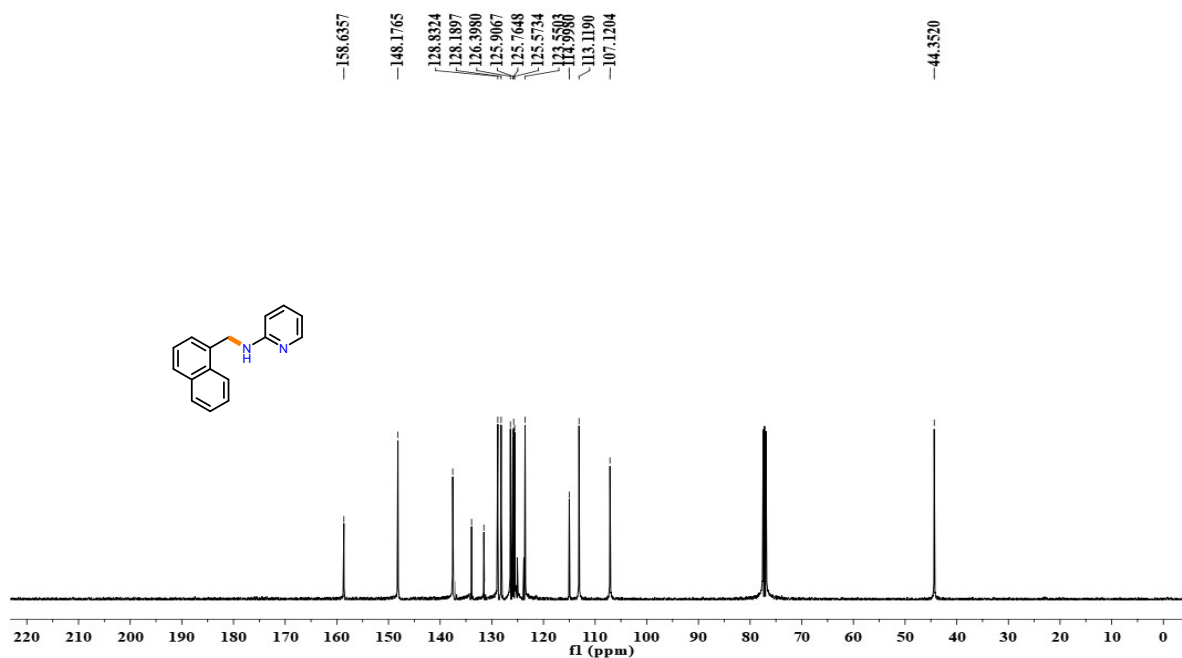

Figure S30. <sup>13</sup>C NMR spectrum of **3j** in CDCl<sub>3</sub> (500 MHz).

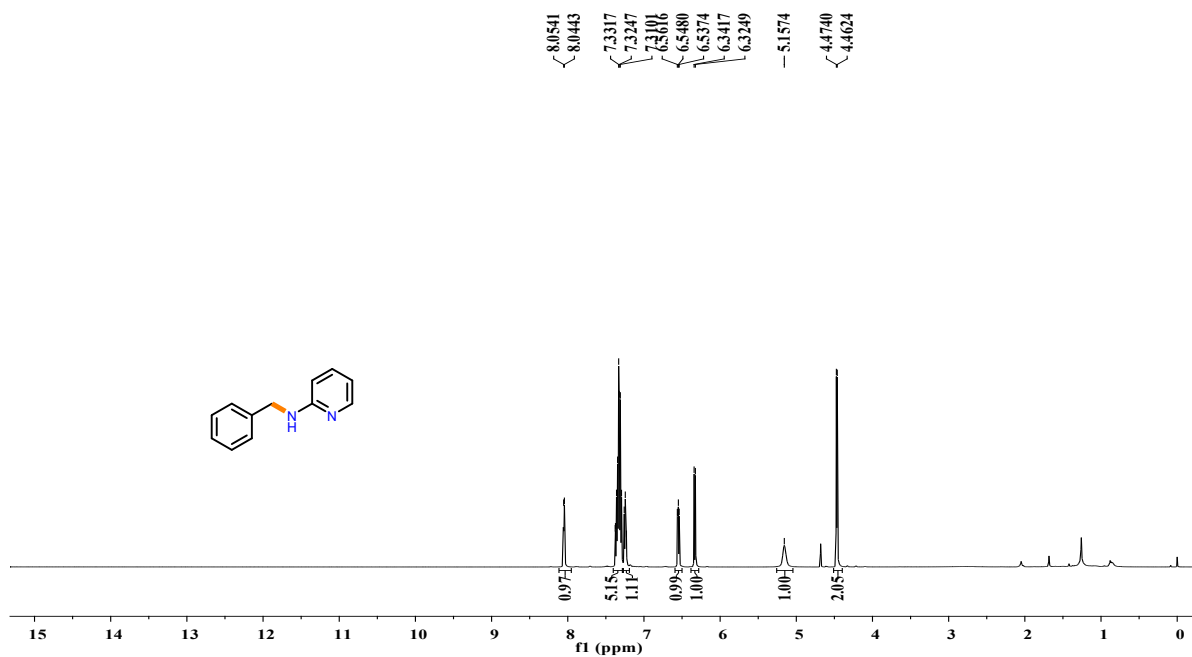

Figure S31.  $^1\text{H}$  NMR spectrum of **3k** in  $\text{CDCl}_3$  (500 MHz).

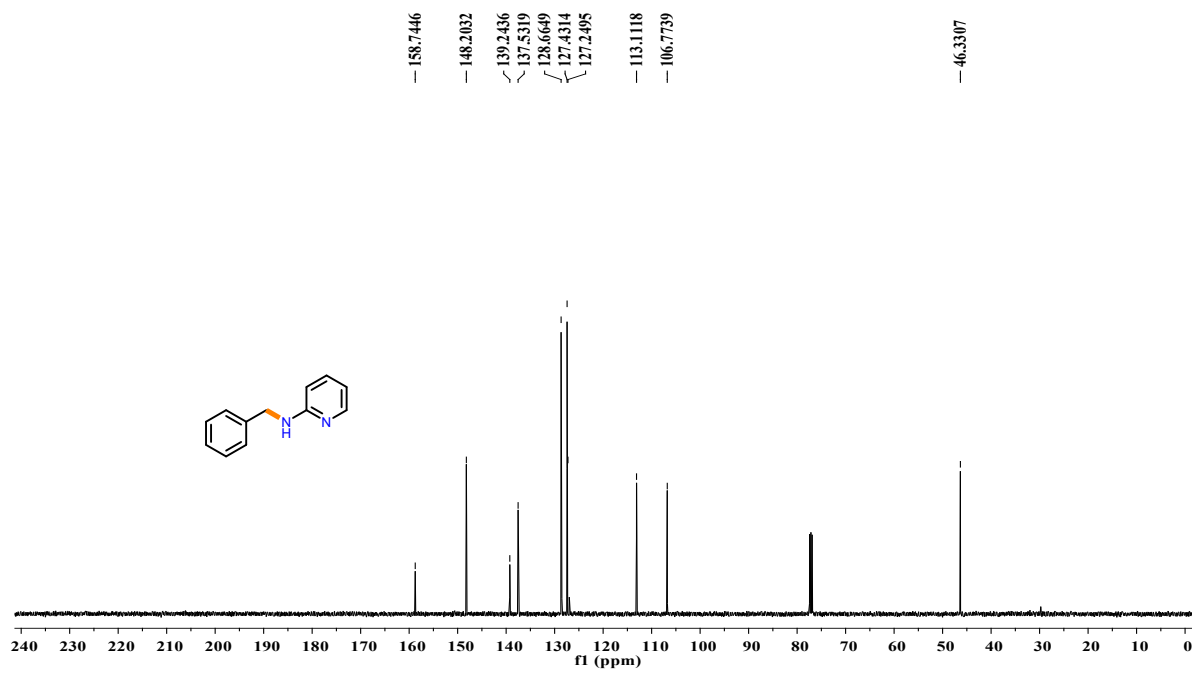

Figure S32.  $^{13}\text{C}$  NMR spectrum of **3k** in  $\text{CDCl}_3$  (500 MHz).

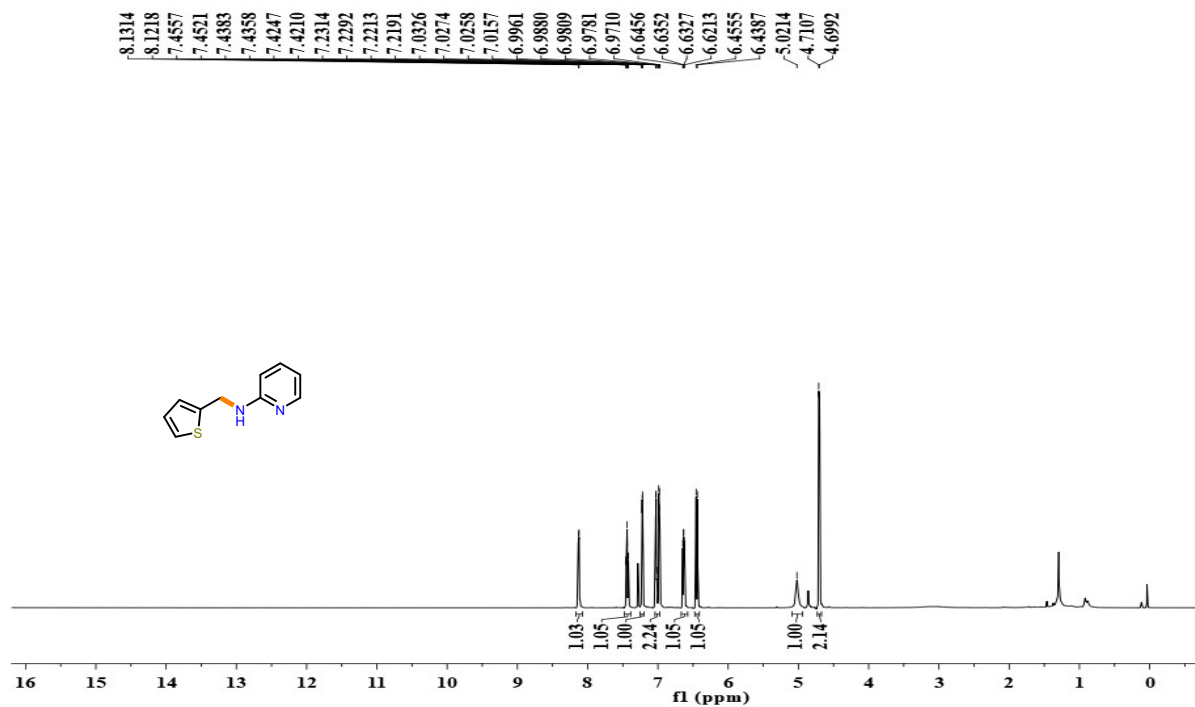

Figure S33. <sup>1</sup>H NMR spectrum of 3I in CDCl<sub>3</sub> (500 MHz).

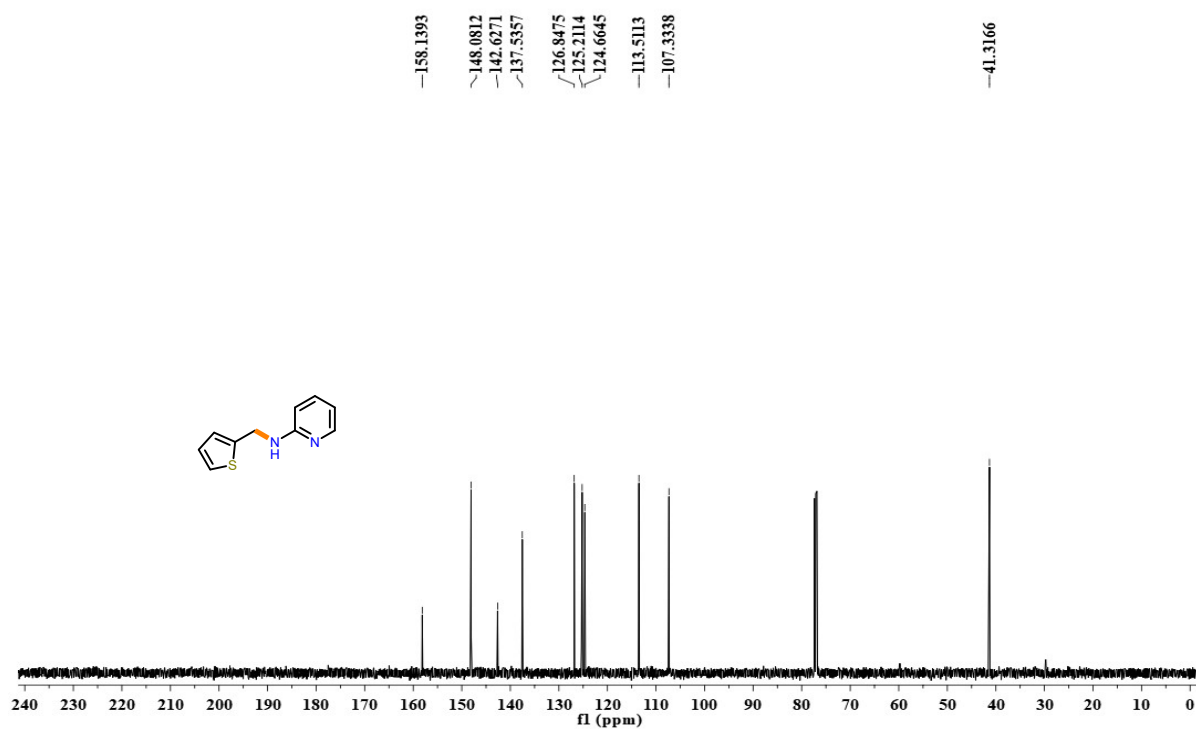

Figure S34.  $^{13}\text{C}$  NMR spectrum of **3l** in  $\text{CDCl}_3$  (500 MHz).

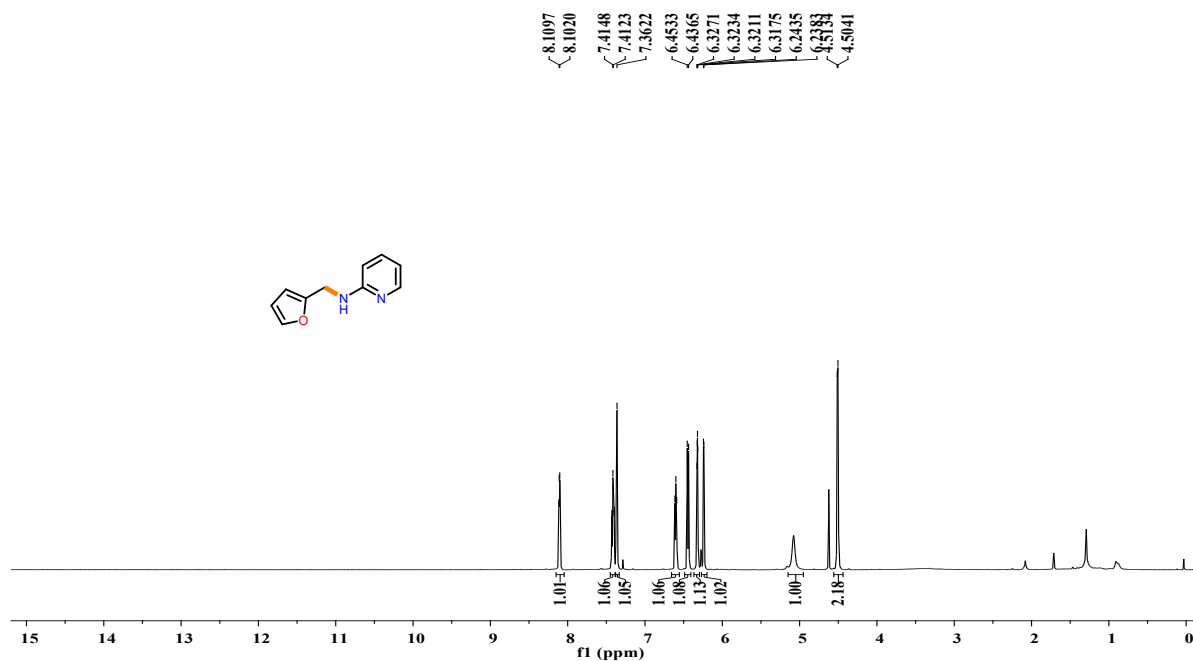

Figure S35.  $^1\text{H}$  NMR spectrum of **3m** in  $\text{CDCl}_3$  (500 MHz).

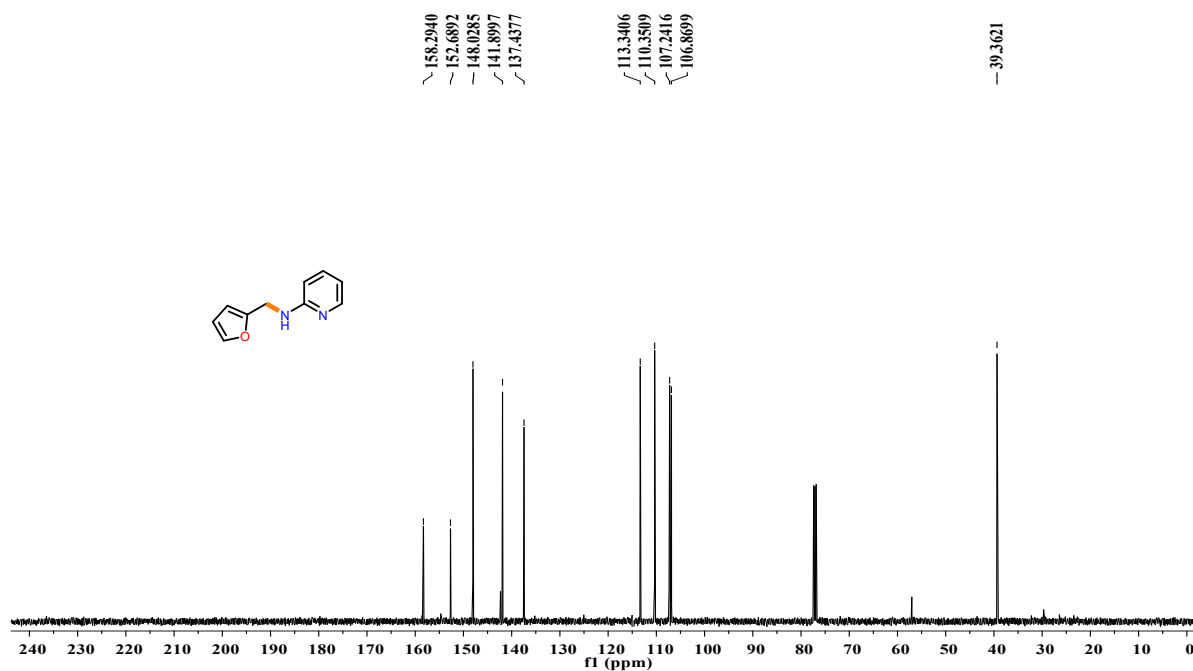

Figure S36.  $^{13}\text{C}$  NMR spectrum of **3m** in  $\text{CDCl}_3$  (500 MHz).

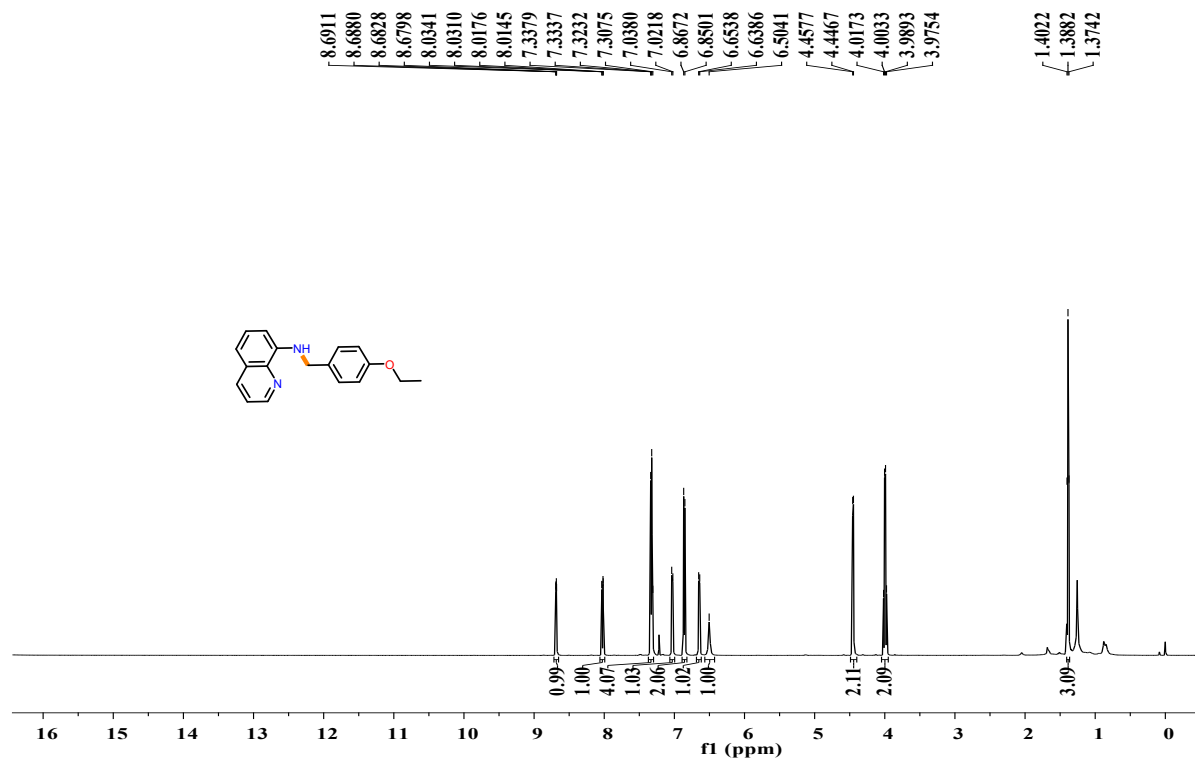

Figure S37.  $^1\text{H}$  NMR spectrum of **3n** in  $\text{CDCl}_3$  (500 MHz).

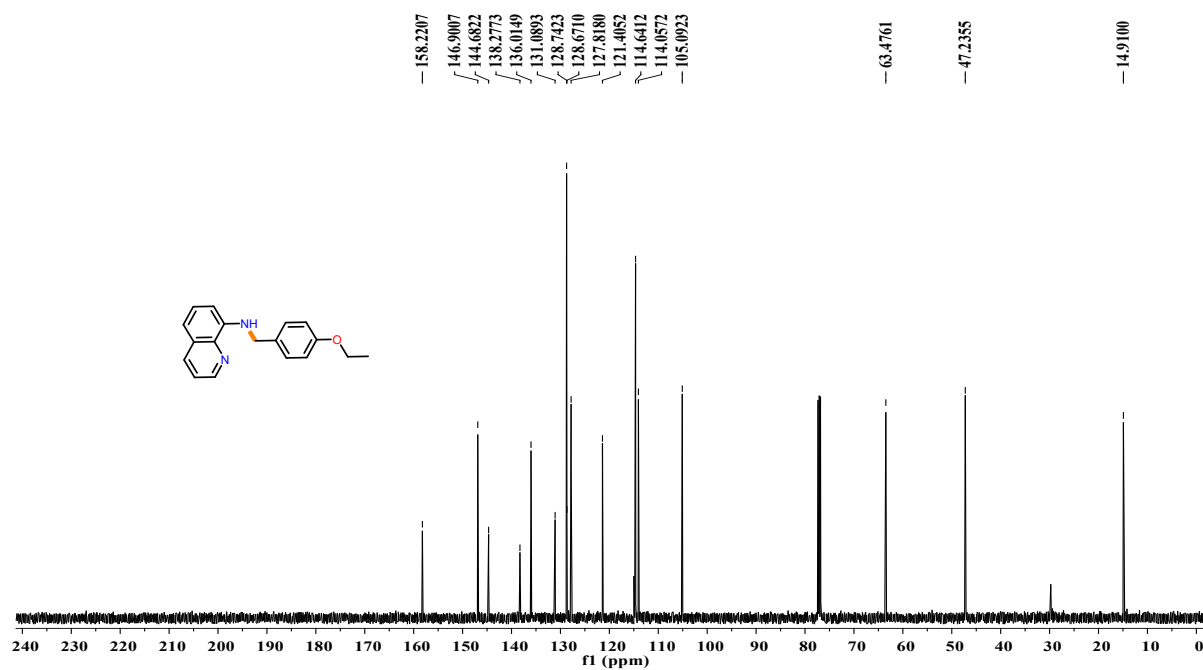

Figure S38. <sup>13</sup>C NMR spectrum of **3n** in CDCl<sub>3</sub> (500 MHz).

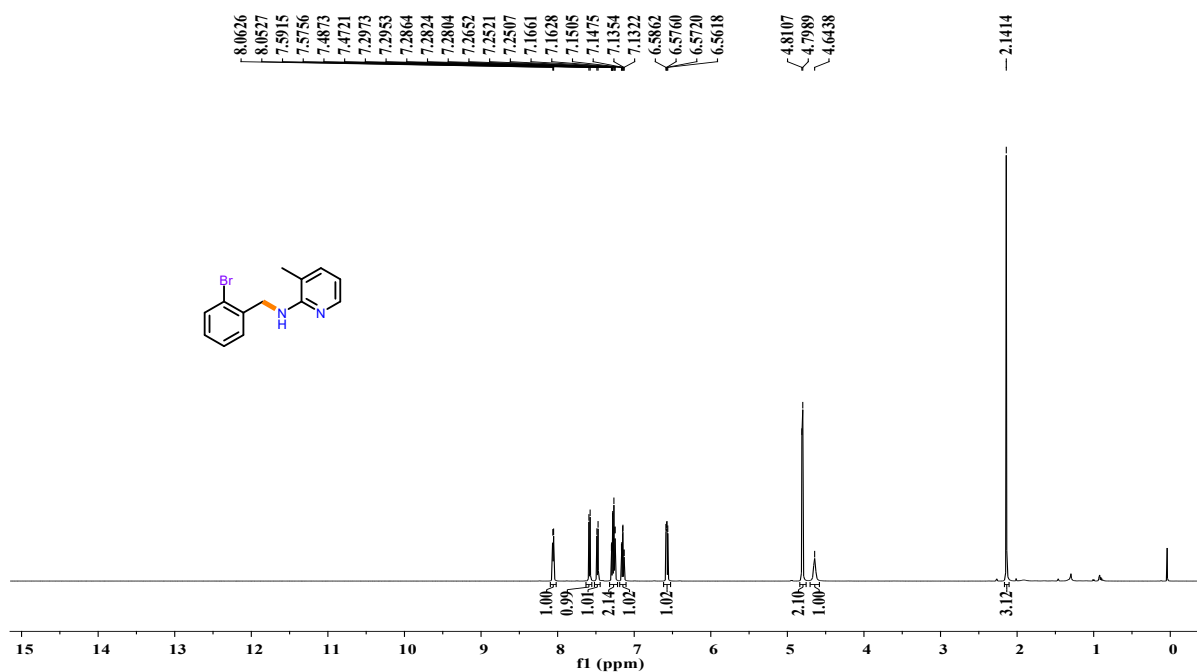

Figure S39. <sup>1</sup>H NMR spectrum of **3o** in CDCl<sub>3</sub> (500 MHz).



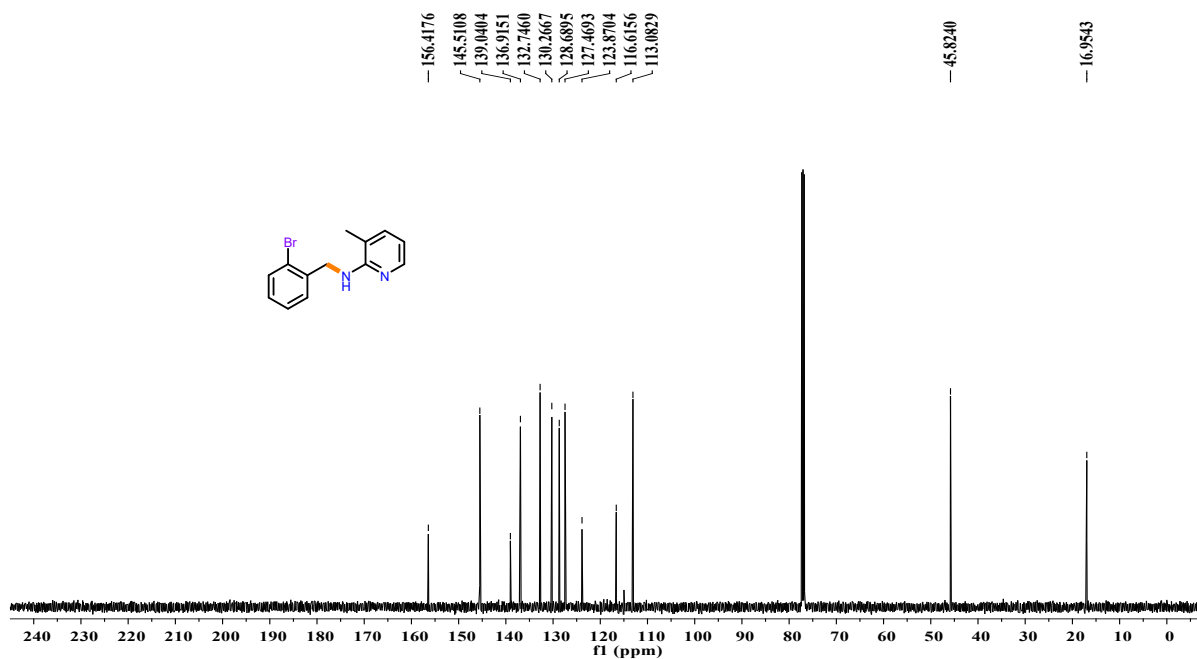

Figure S40. <sup>13</sup>C NMR spectrum of **3o** in CDCl<sub>3</sub> (500 MHz).

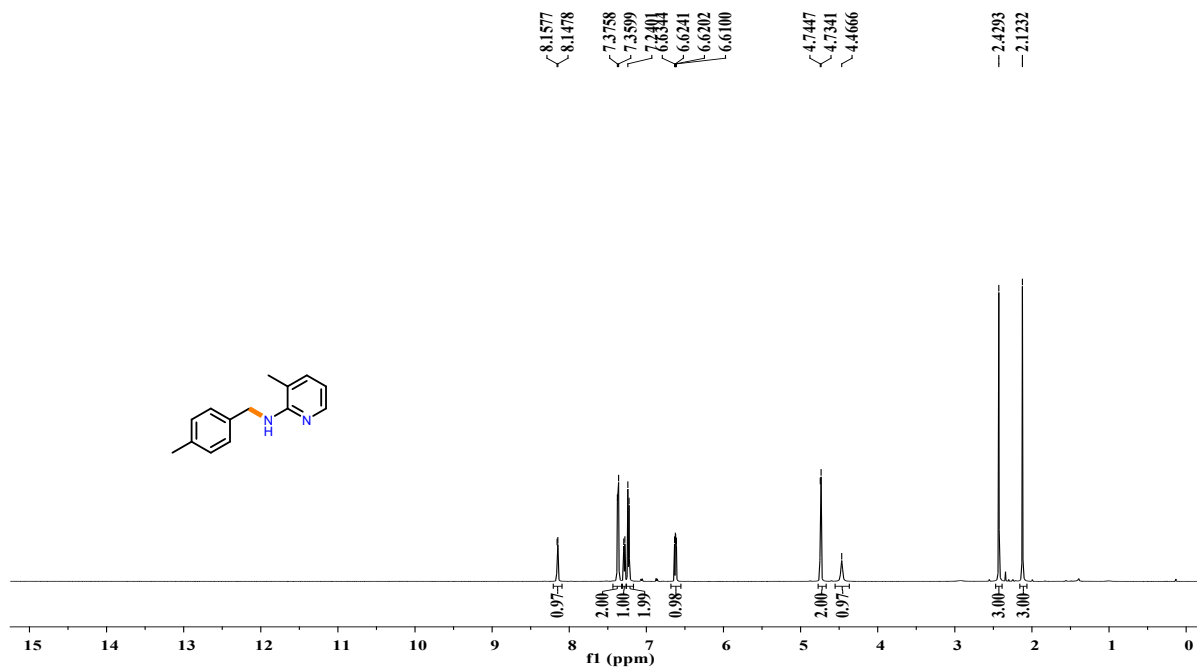

Figure S41. <sup>1</sup>H NMR spectrum of **3p** in CDCl<sub>3</sub> (500 MHz).

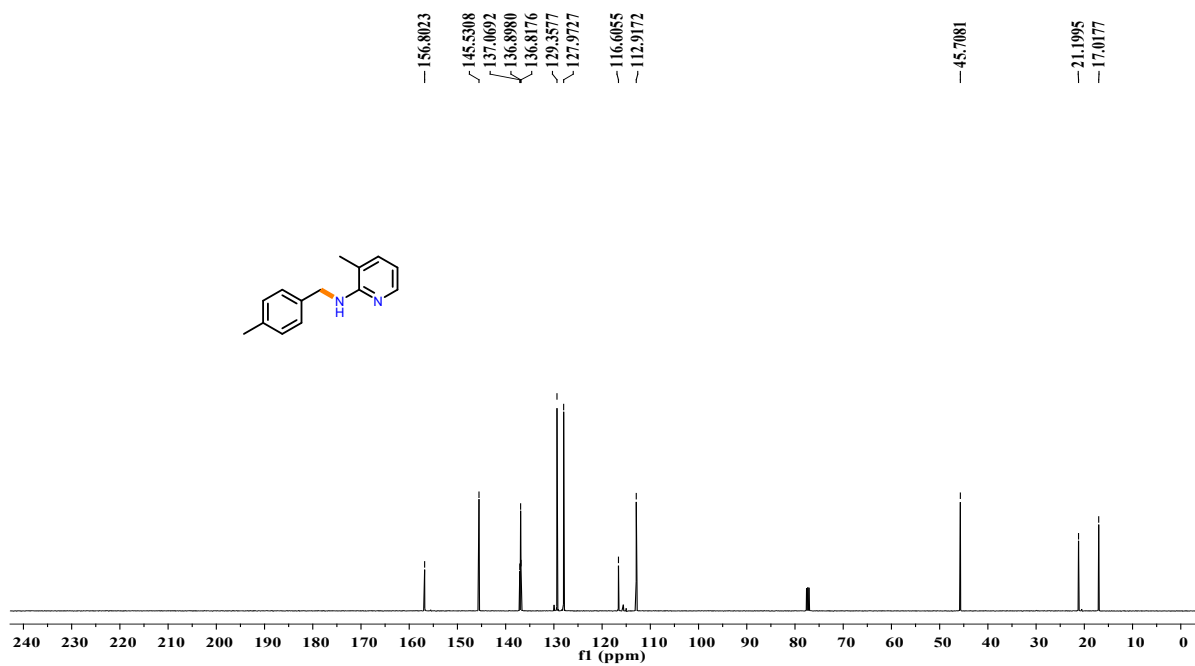

Figure S42.  $^{13}\text{C}$  NMR spectrum of **3p** in  $\text{CDCl}_3$  (500 MHz).

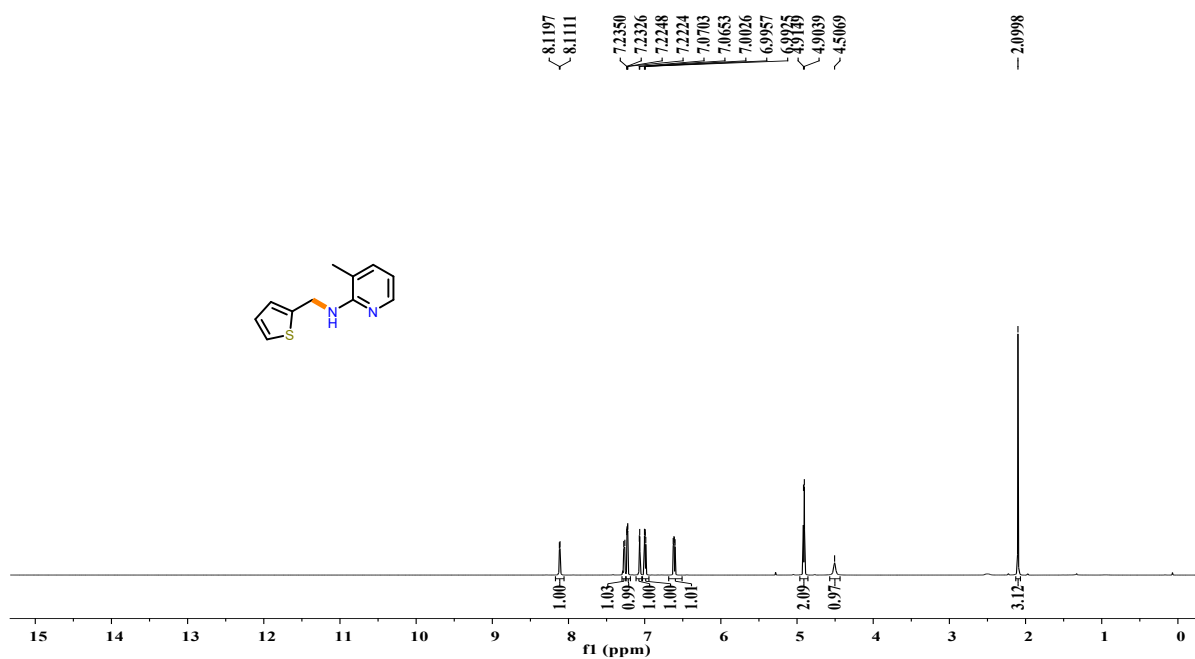

Figure S43.  $^1\text{H}$  NMR spectrum of **3q** in  $\text{CDCl}_3$  (500 MHz).

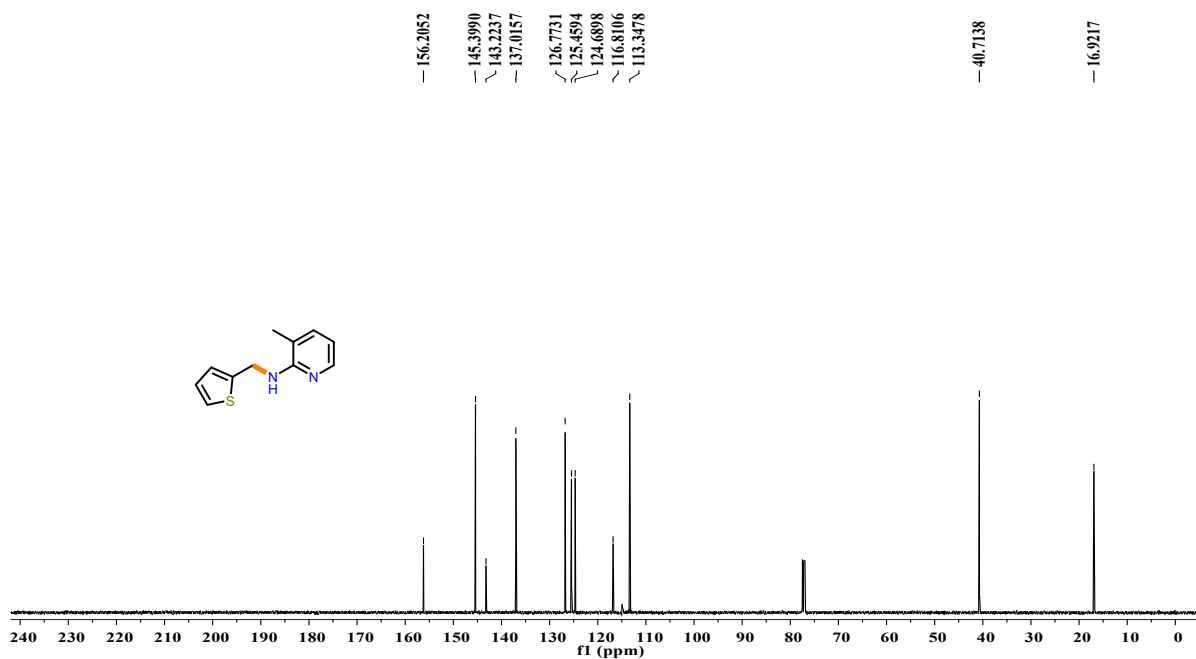

Figure S44.  $^{13}\text{C}$  NMR spectrum of **3q** in  $\text{CDCl}_3$  (500 MHz).

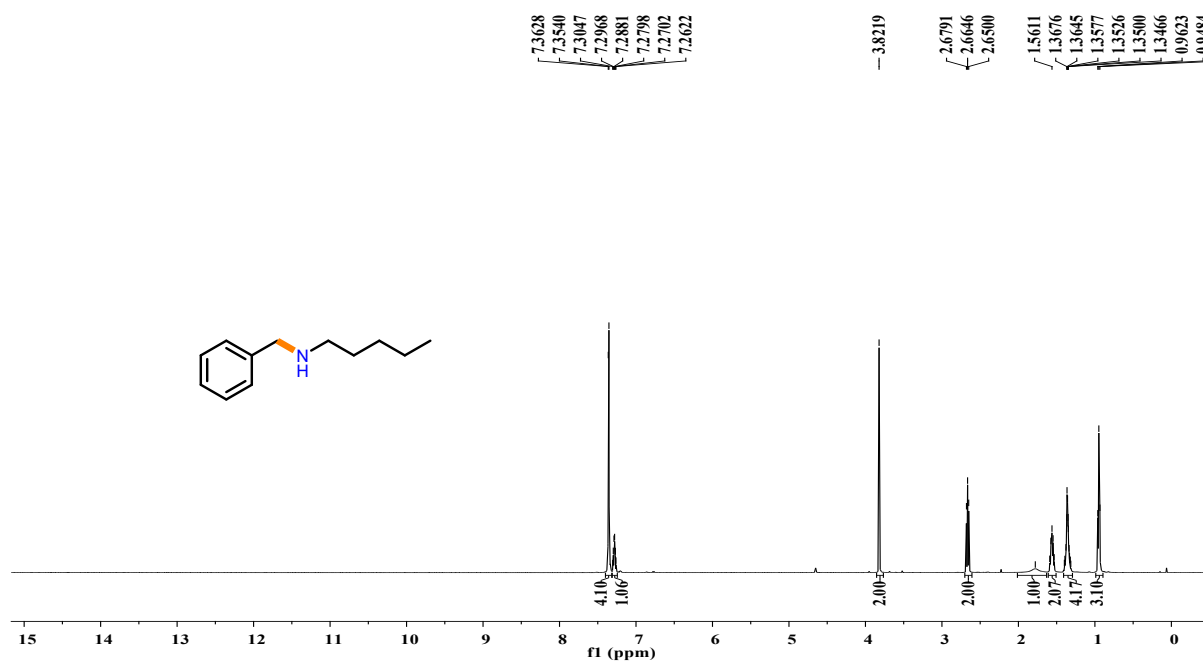

Figure S45.  $^1\text{H}$  NMR spectrum of **3r** in  $\text{CDCl}_3$  (500 MHz).

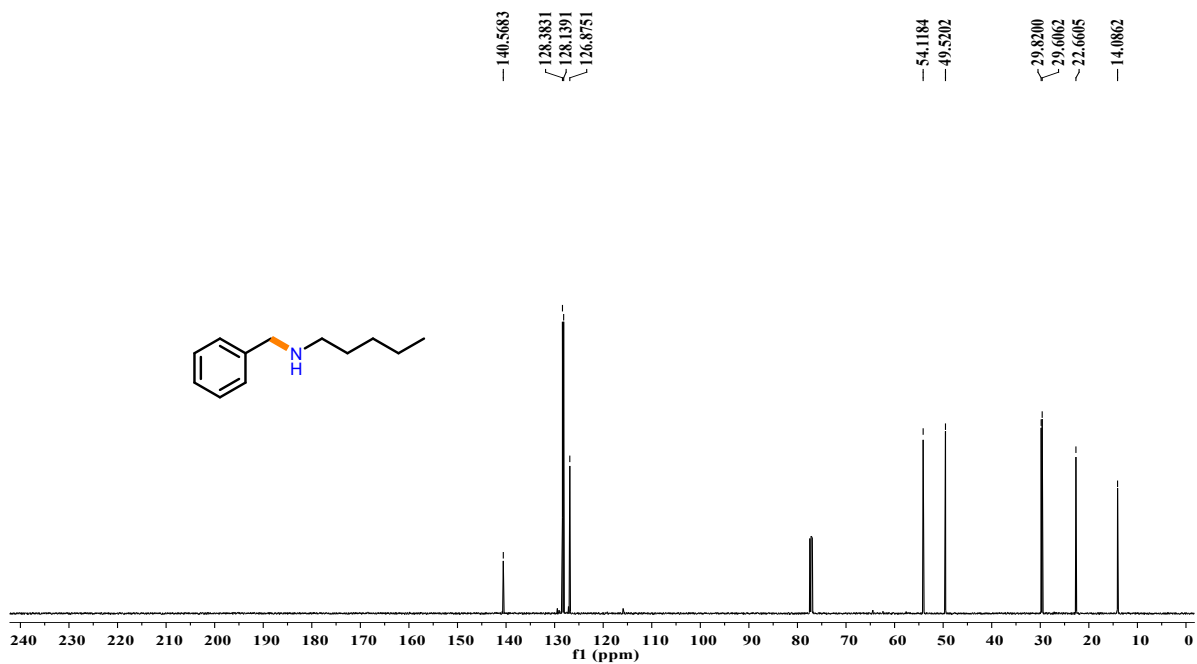

Figure S46.  $^{13}\text{C}$  NMR spectrum of **3r** in  $\text{CDCl}_3$  (500 MHz).

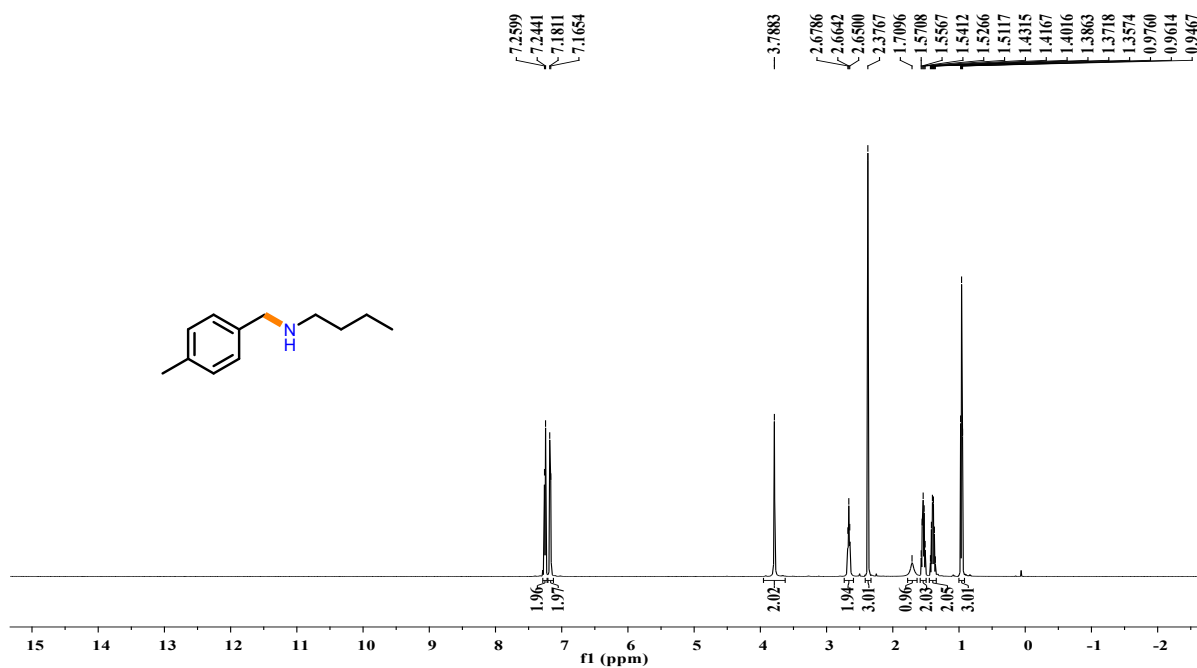

Figure S47.  $^1\text{H}$  NMR spectrum of **3s** in  $\text{CDCl}_3$  (500 MHz).

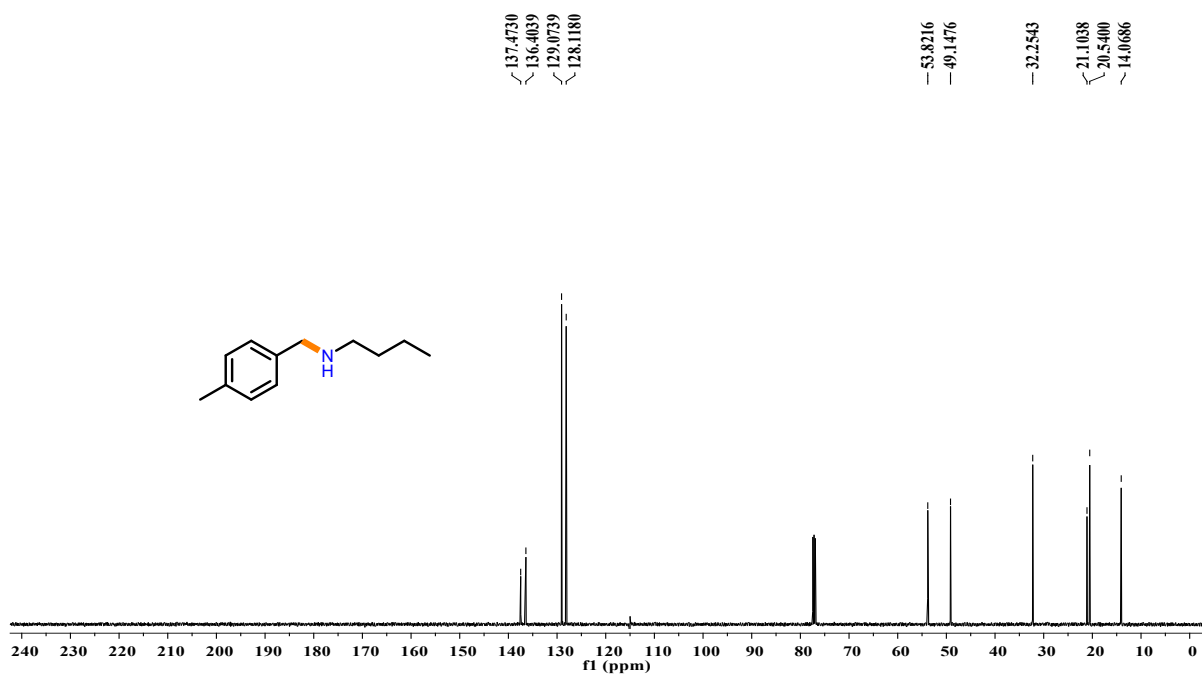

Figure S48.  $^{13}\text{C}$  NMR spectrum of **3s** in  $\text{CDCl}_3$  (500 MHz).

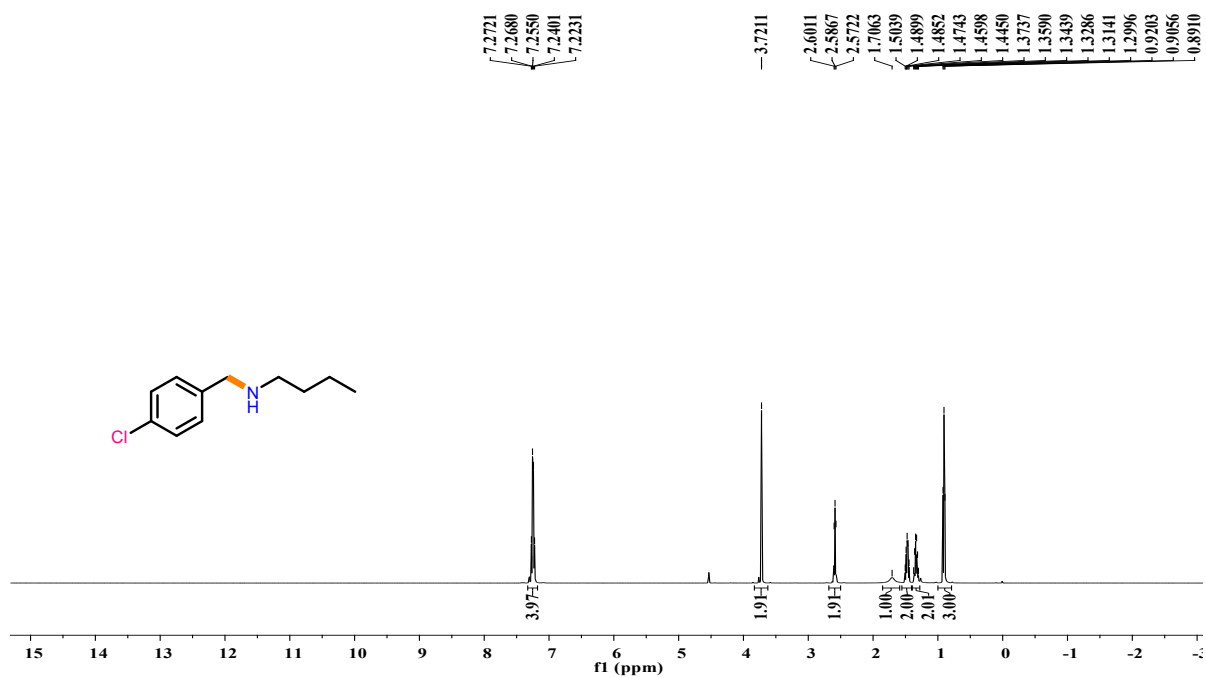

Figure S49.  $^1\text{H}$  NMR spectrum of **3t** in  $\text{CDCl}_3$  (500 MHz).

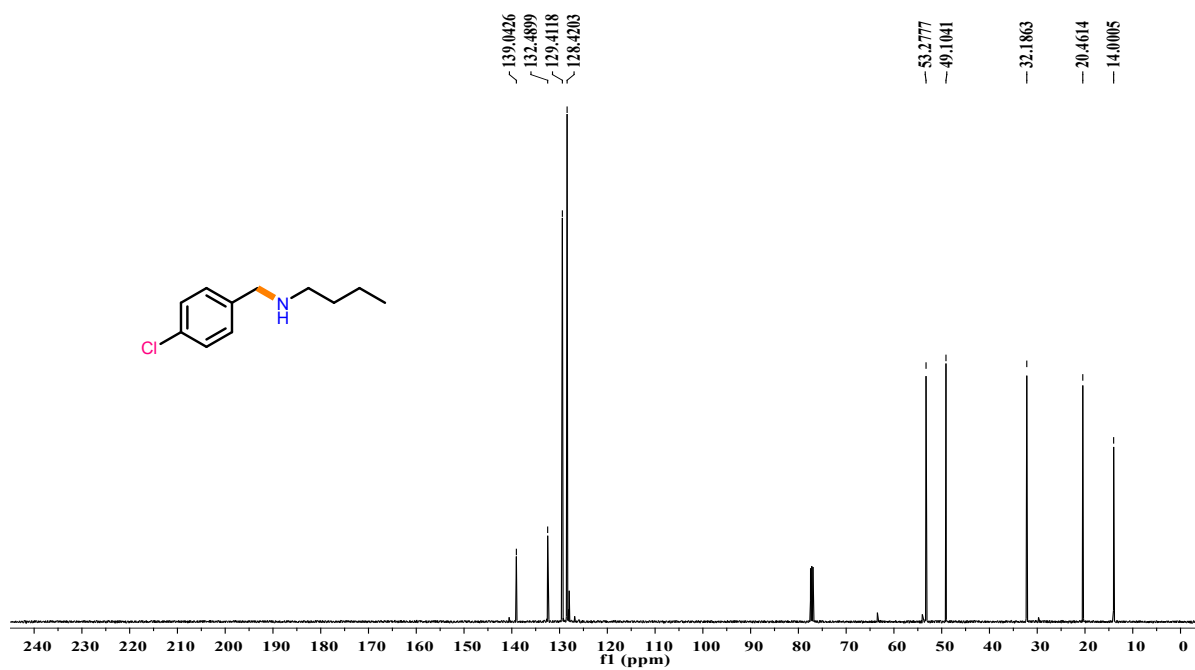

Figure S50.  $^{13}\text{C}$  NMR spectrum of **3t** in  $\text{CDCl}_3$  (500 MHz).

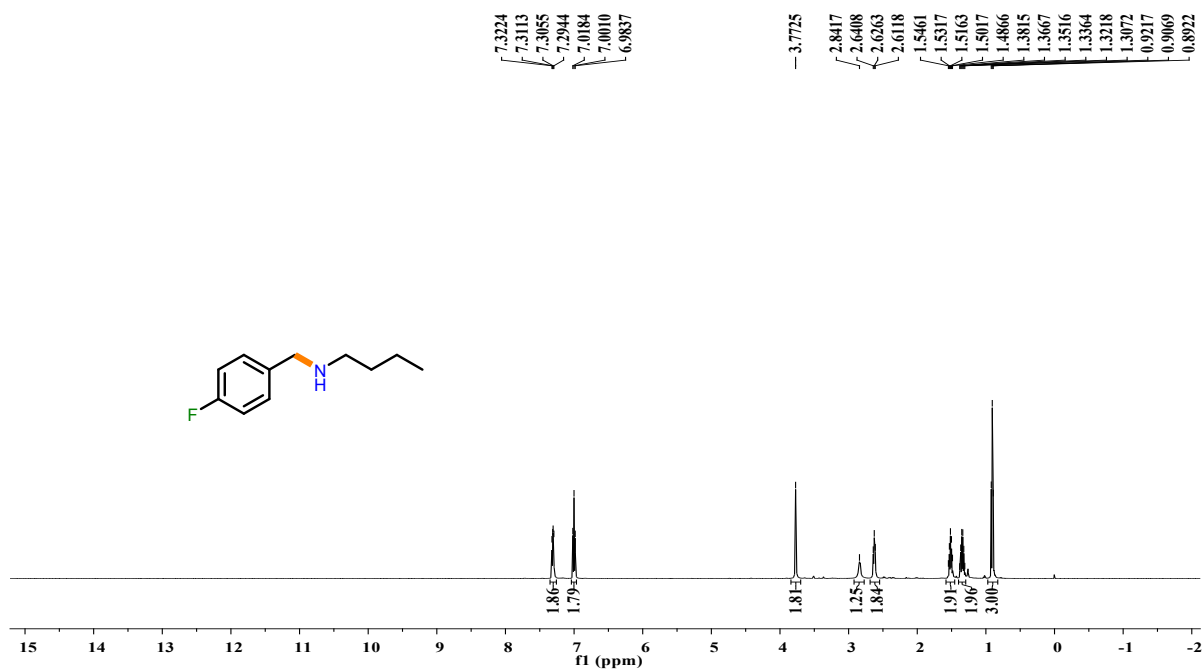

Figure S51.  $^1\text{H}$  NMR spectrum of **3u** in  $\text{CDCl}_3$  (500 MHz).

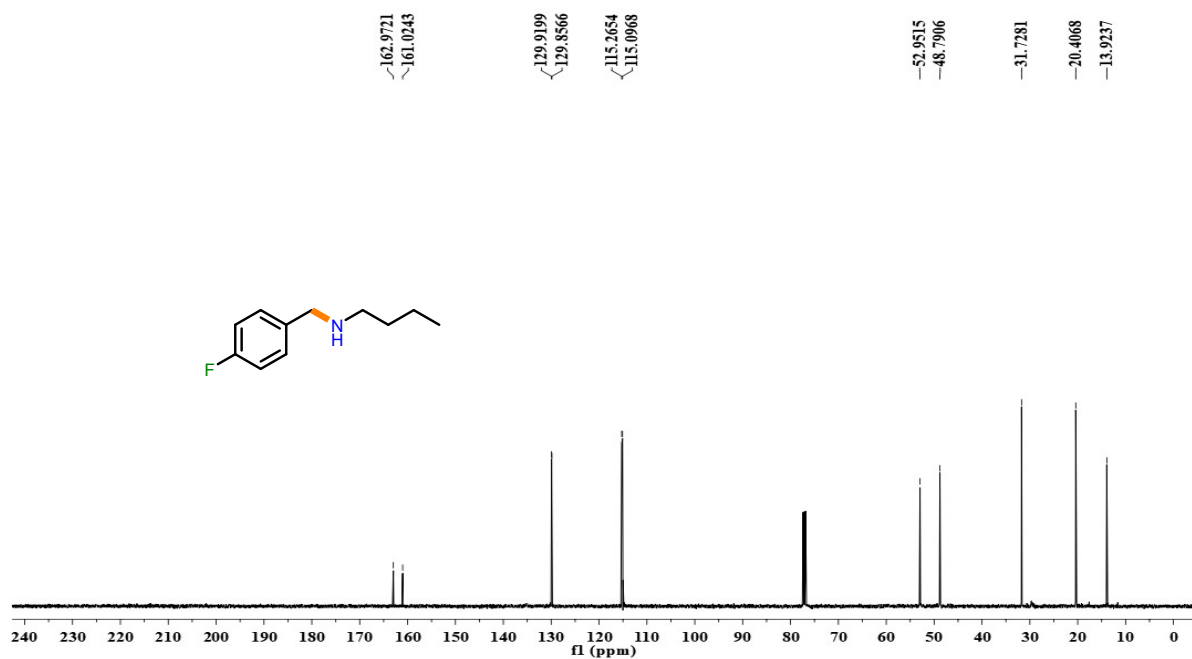

Figure S52.  $^{13}\text{C}$  NMR spectrum of **3u** in  $\text{CDCl}_3$  (500 MHz).

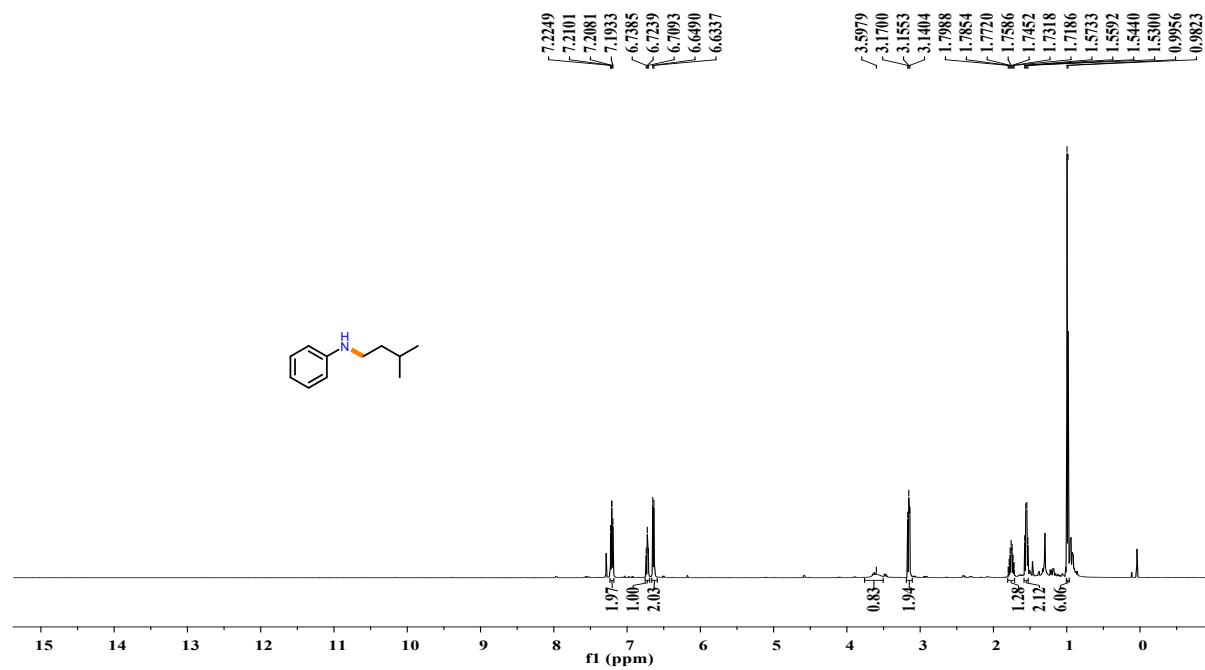

Figure S53.  $^1\text{H}$  NMR spectrum of **3v** in  $\text{CDCl}_3$  (500 MHz).

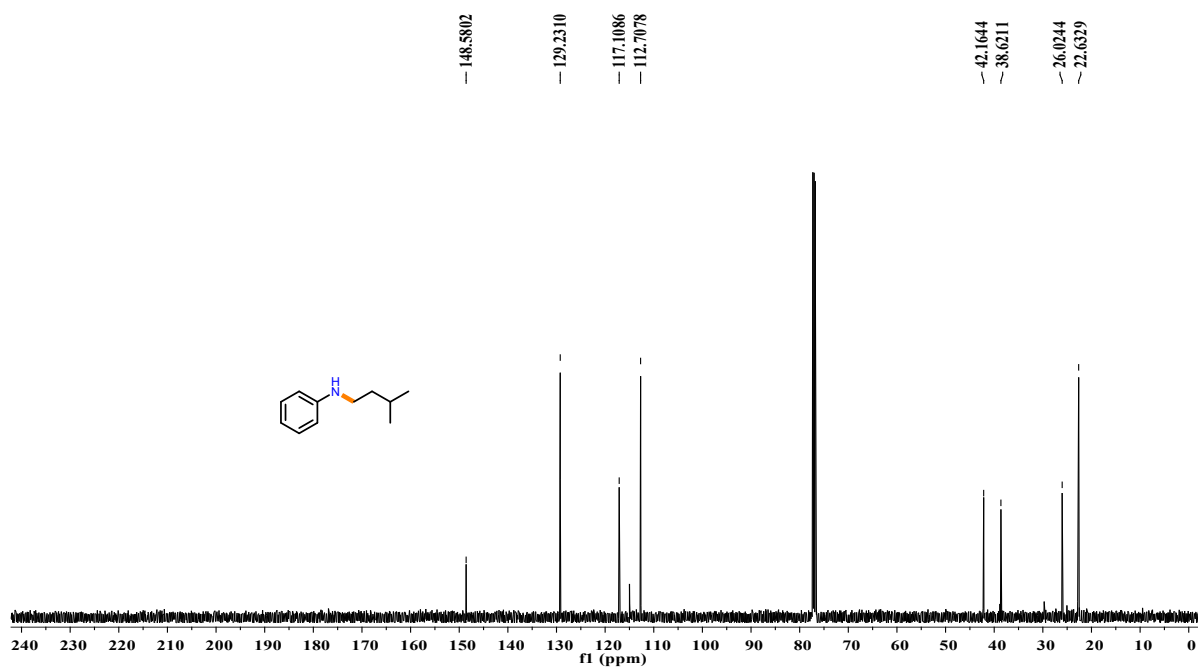

Figure S54. <sup>13</sup>C NMR spectrum of **3v** in CDCl<sub>3</sub> (500 MHz).

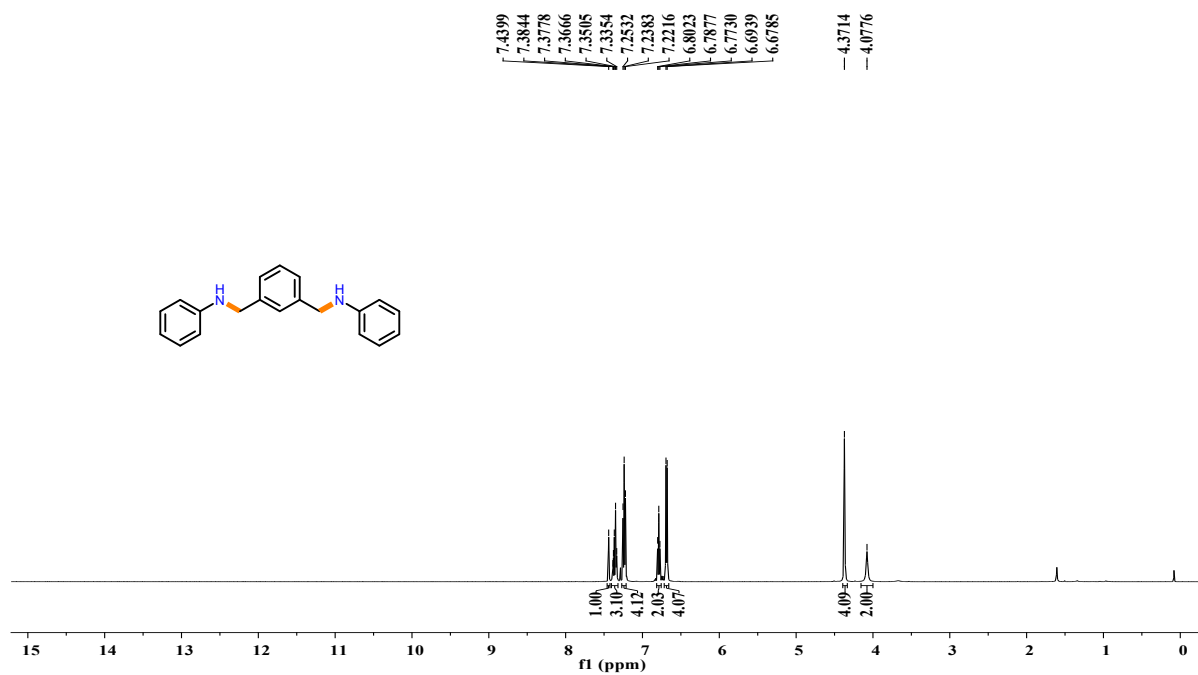

Figure S55. <sup>1</sup>H NMR spectrum of **3w** in CDCl<sub>3</sub> (500 MHz).



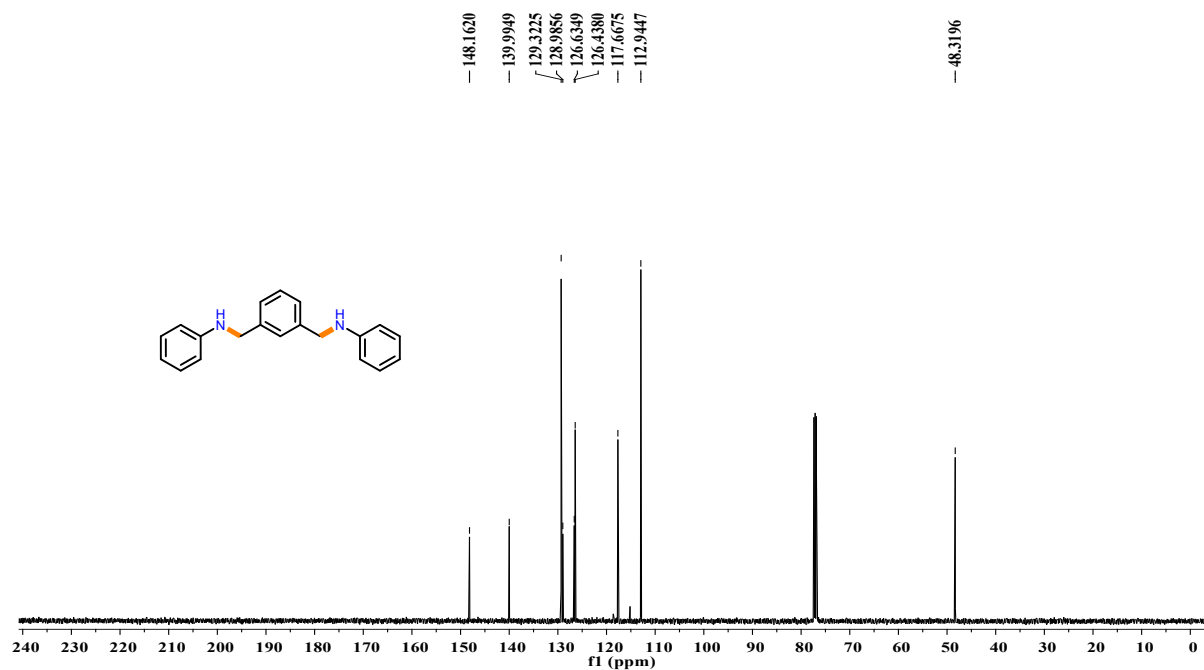

Figure S56. <sup>13</sup>C NMR spectrum of **3w** in CDCl<sub>3</sub> (500 MHz).

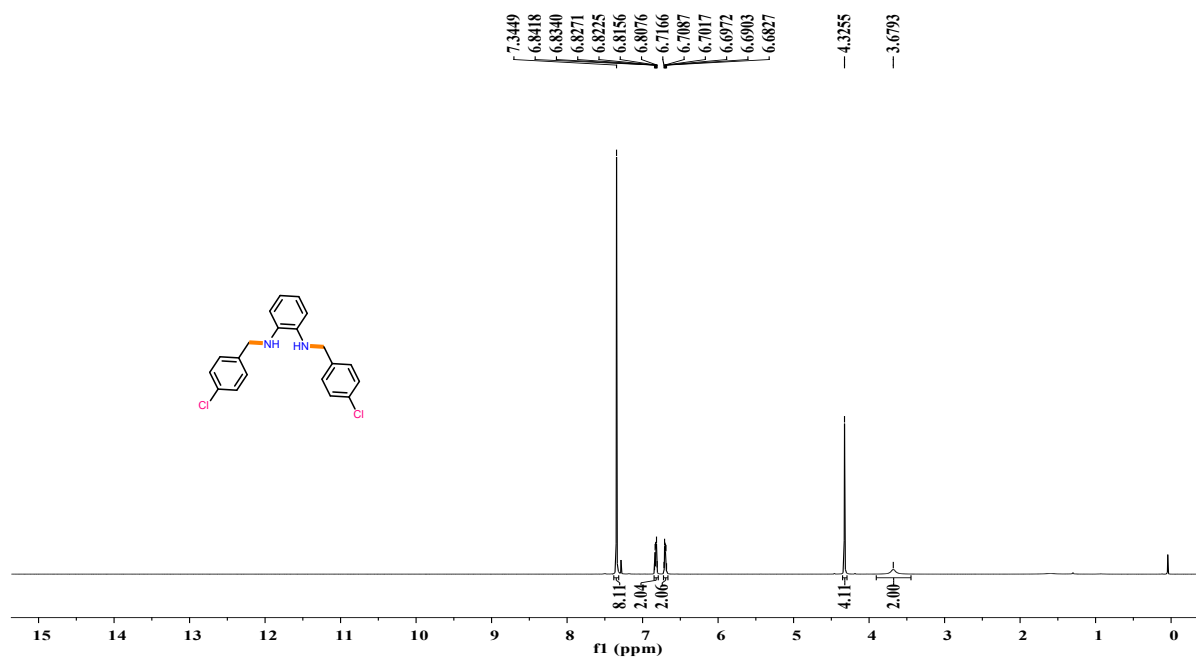

Figure S57. <sup>1</sup>H NMR spectrum of **3x** in CDCl<sub>3</sub> (500 MHz).

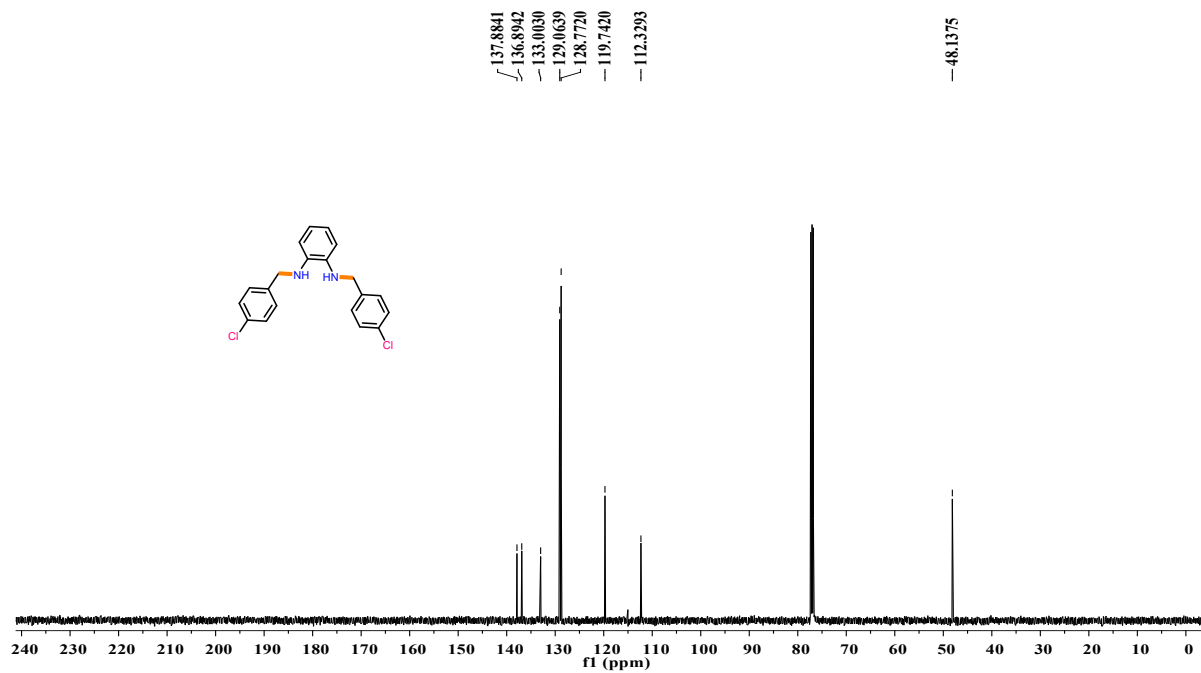

Figure S58. <sup>13</sup>C NMR spectrum of **3x** in CDCl<sub>3</sub> (500 MHz).

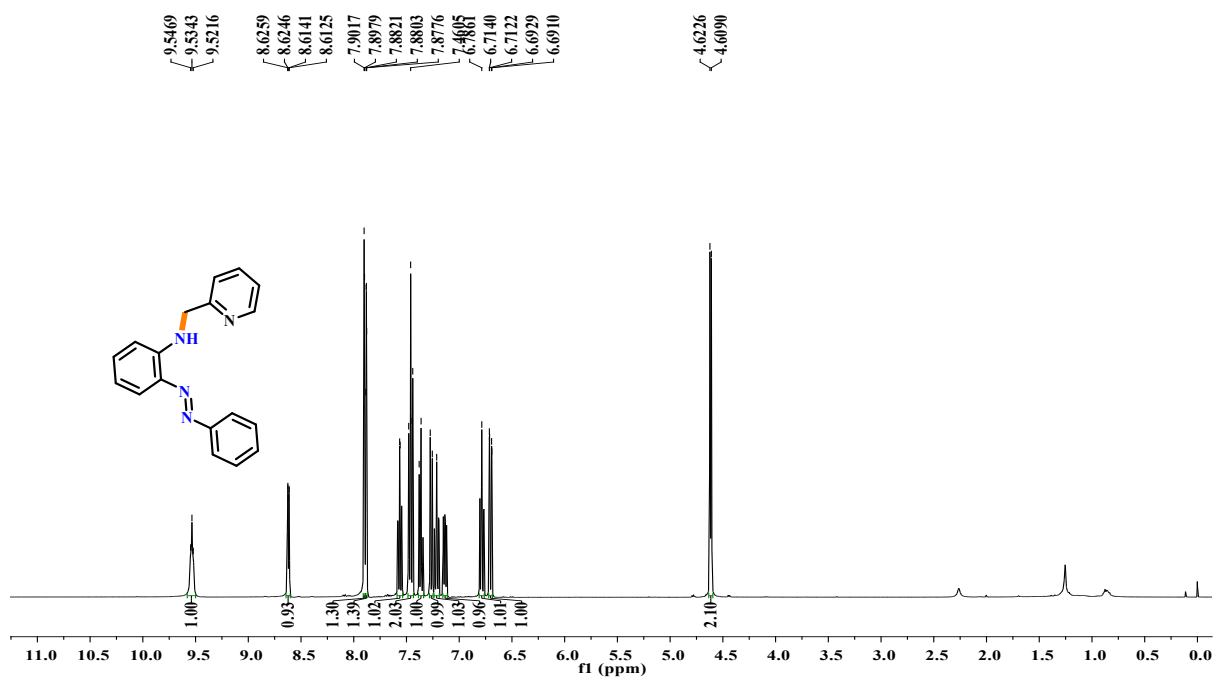

Figure S59. <sup>1</sup>H NMR spectrum of **3y** in CDCl<sub>3</sub> (500 MHz).

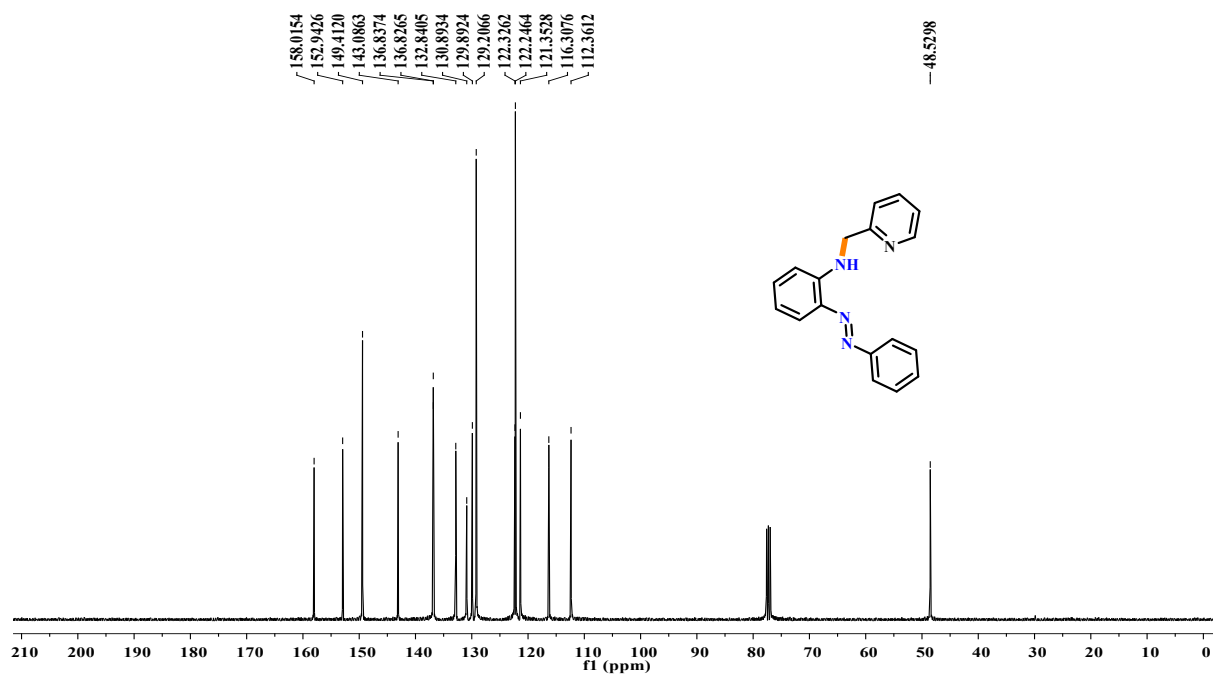

Figure S60. <sup>13</sup>C NMR spectrum of **3y** in CDCl<sub>3</sub> (500 MHz).

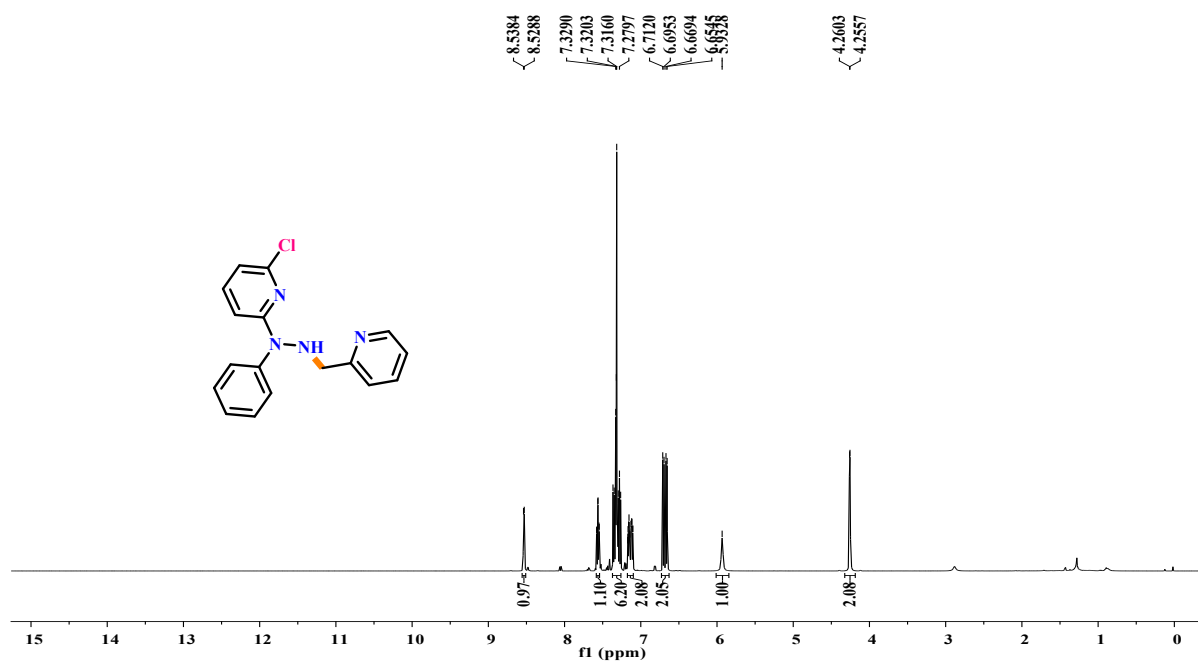

Figure S61. <sup>1</sup>H NMR spectrum of **3z** in CDCl<sub>3</sub> (500 MHz).

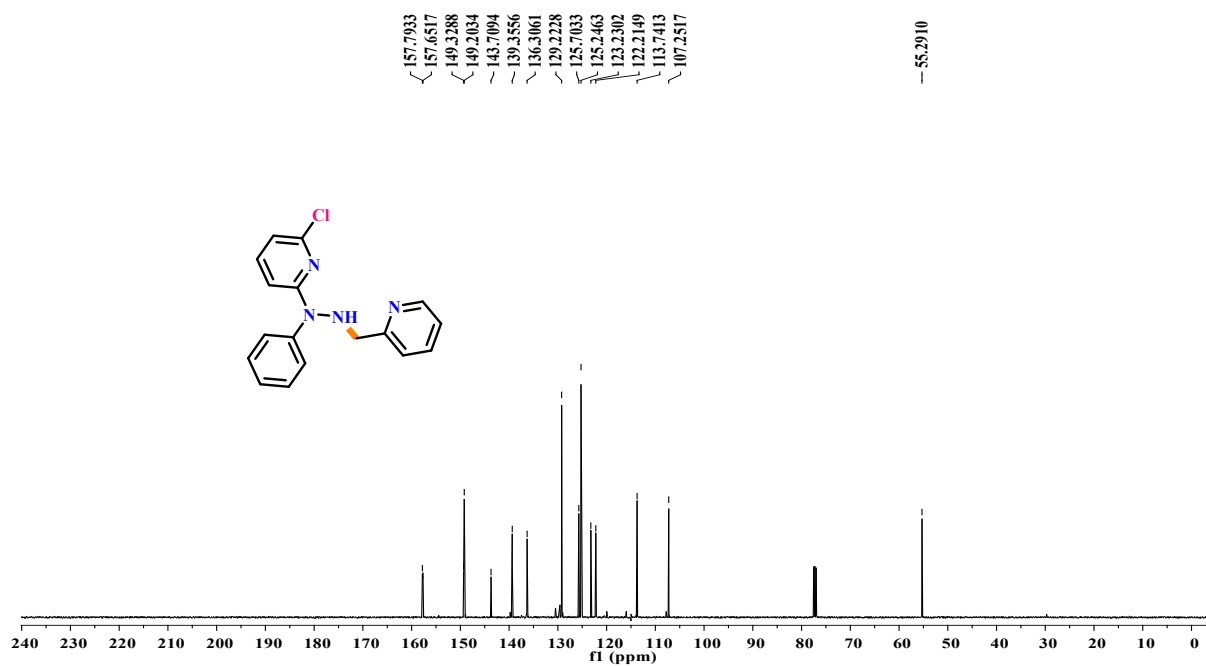

Figure S62. <sup>13</sup>C NMR spectrum of **3z** in CDCl<sub>3</sub> (500 MHz).

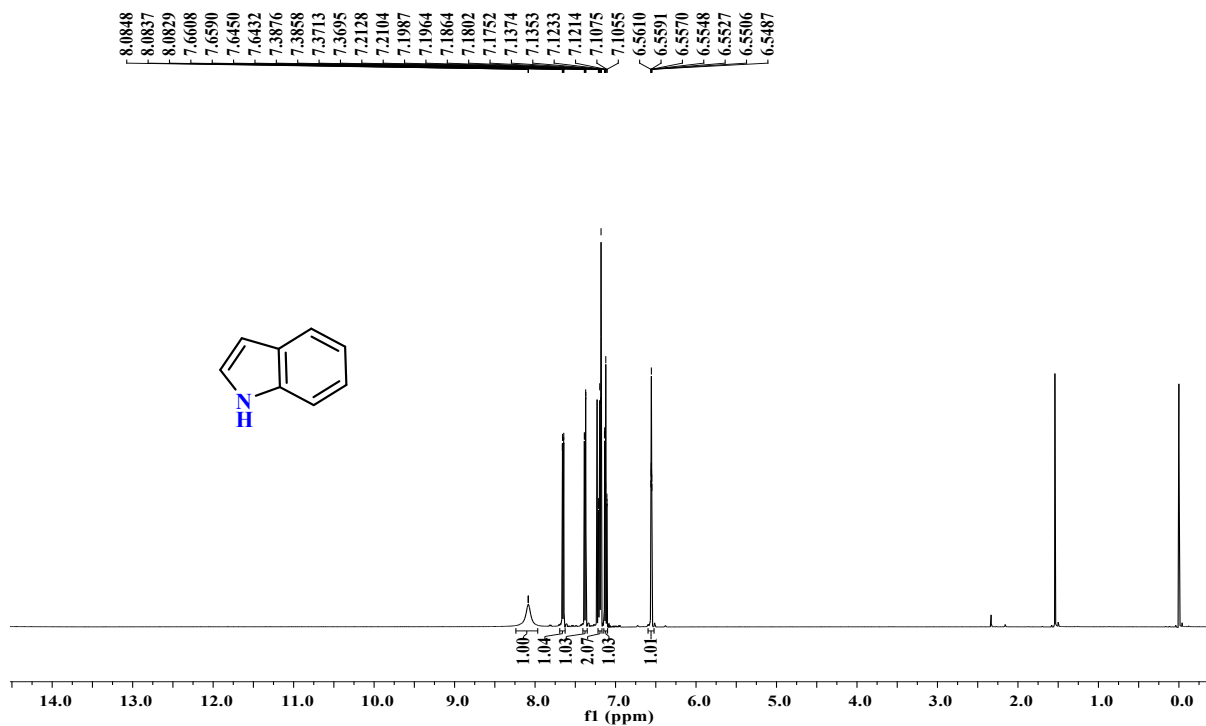

Figure S63. <sup>1</sup>H NMR spectrum of **4a** in CDCl<sub>3</sub> (500 MHz).

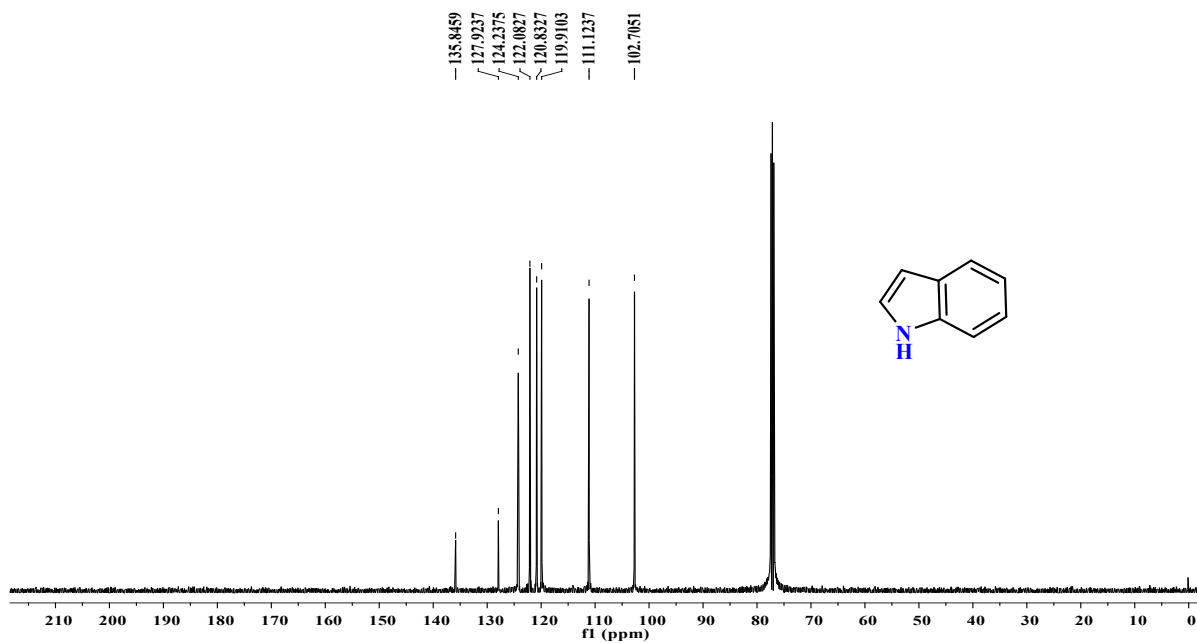

Figure S64.  $^{13}\text{C}$  NMR spectrum of **4a** in  $\text{CDCl}_3$  (500 MHz).

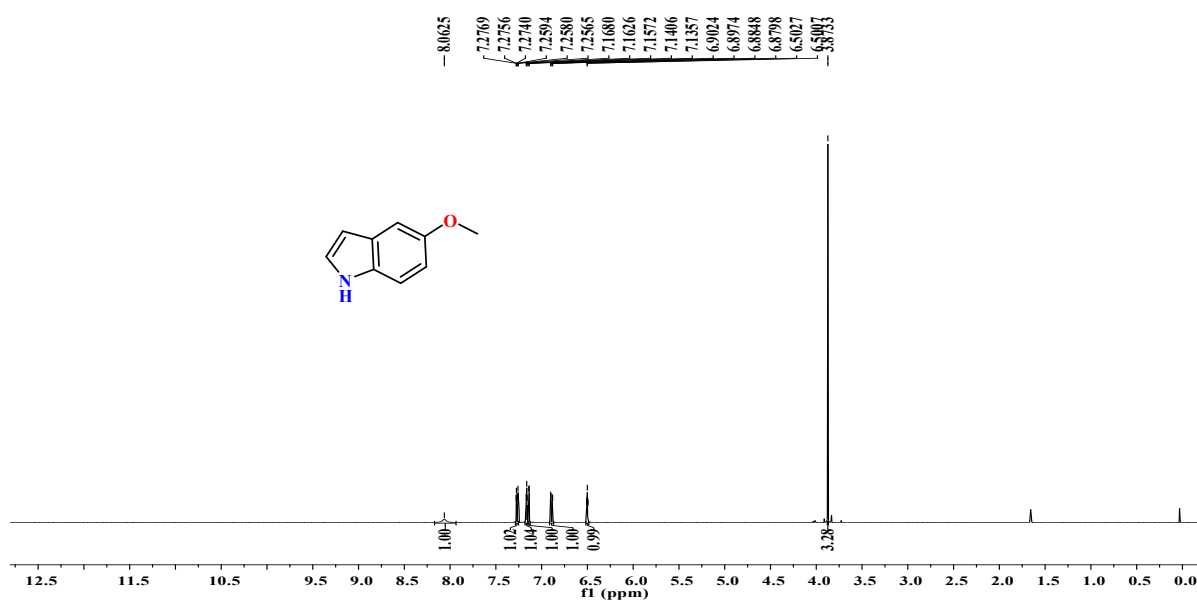

Figure S65.  $^1\text{H}$  NMR spectrum of **4b** in  $\text{CDCl}_3$  (500 MHz).

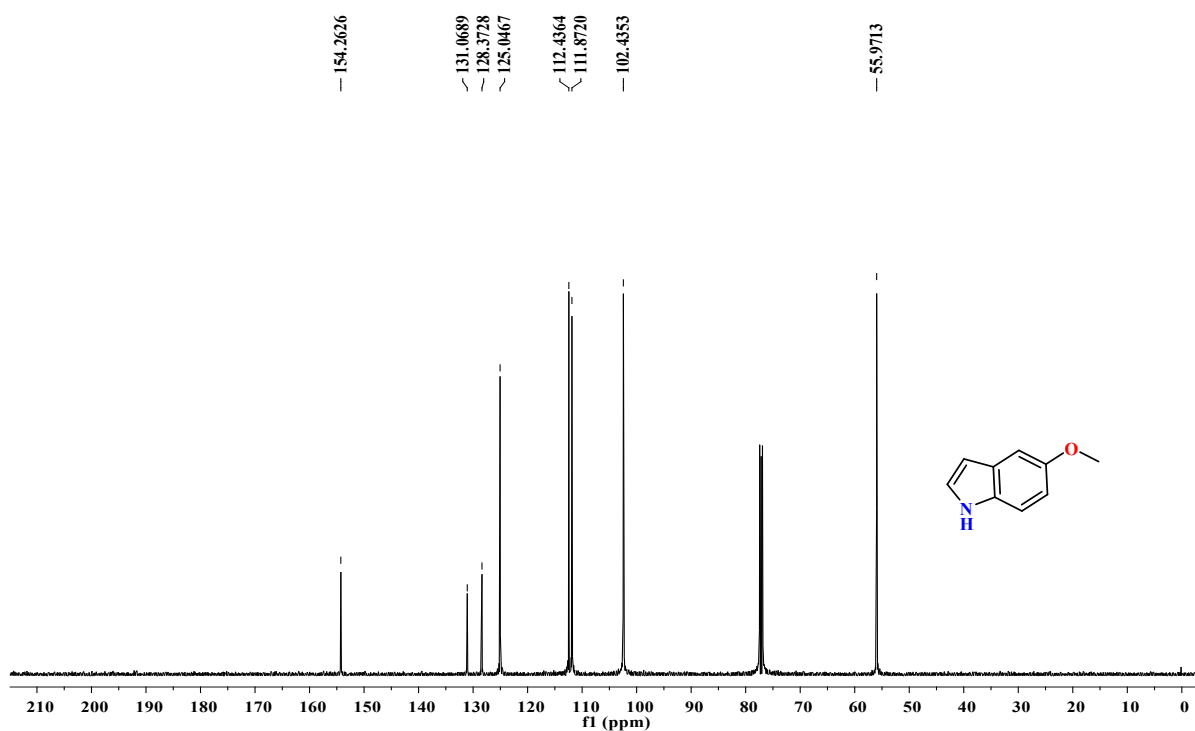

Figure S66.  $^{13}\text{C}$  NMR spectrum of **4b** in  $\text{CDCl}_3$  (500 MHz).

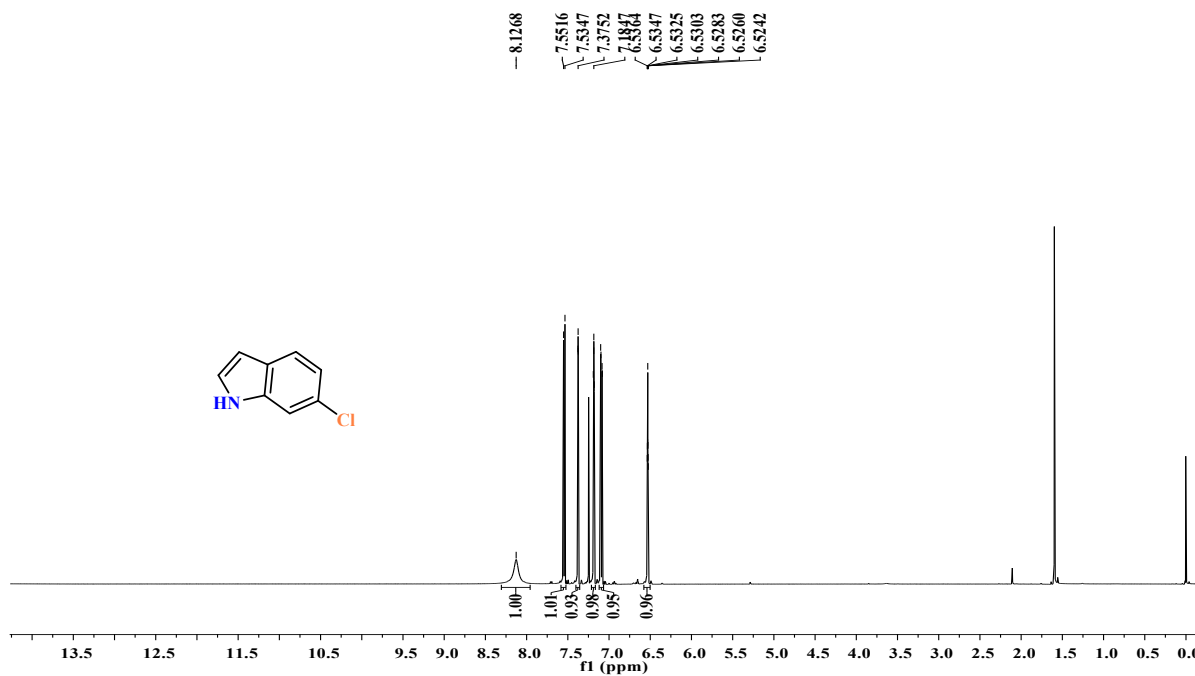

Figure S67.  $^1\text{H}$  NMR spectrum of **4c** in  $\text{CDCl}_3$  (500 MHz).

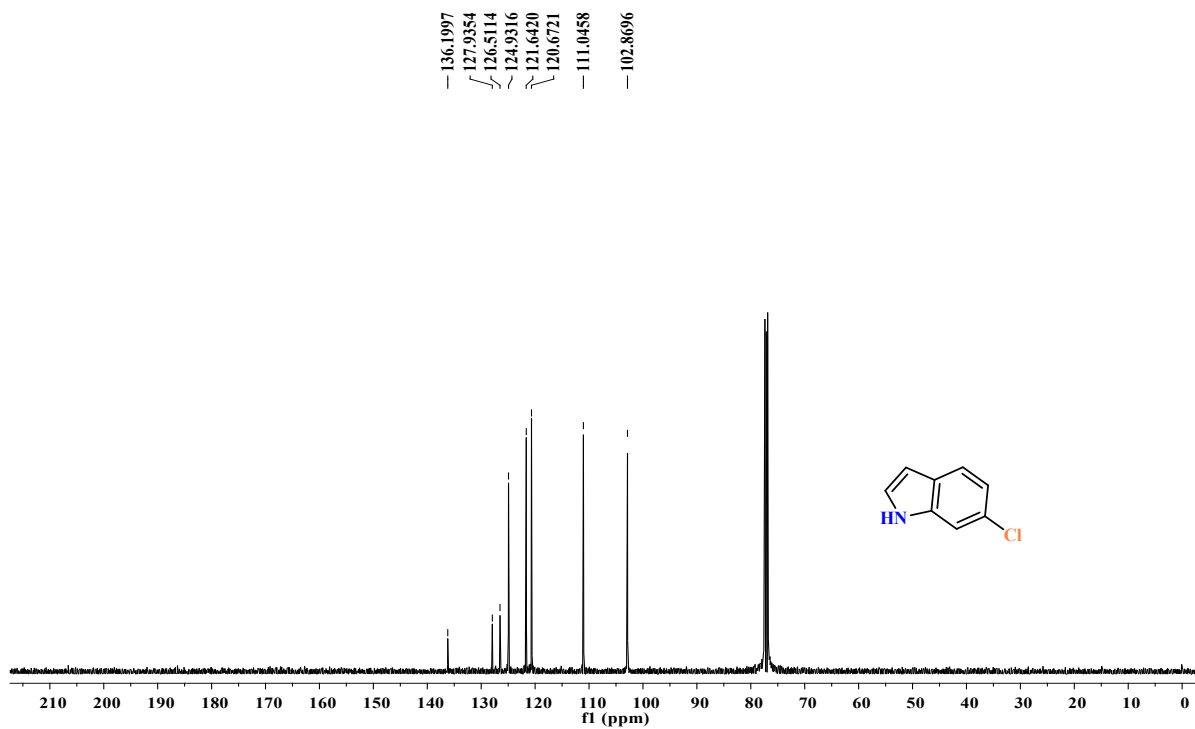

Figure S68.  $^{13}\text{C}$  NMR spectrum of **4c** in  $\text{CDCl}_3$  (500 MHz).

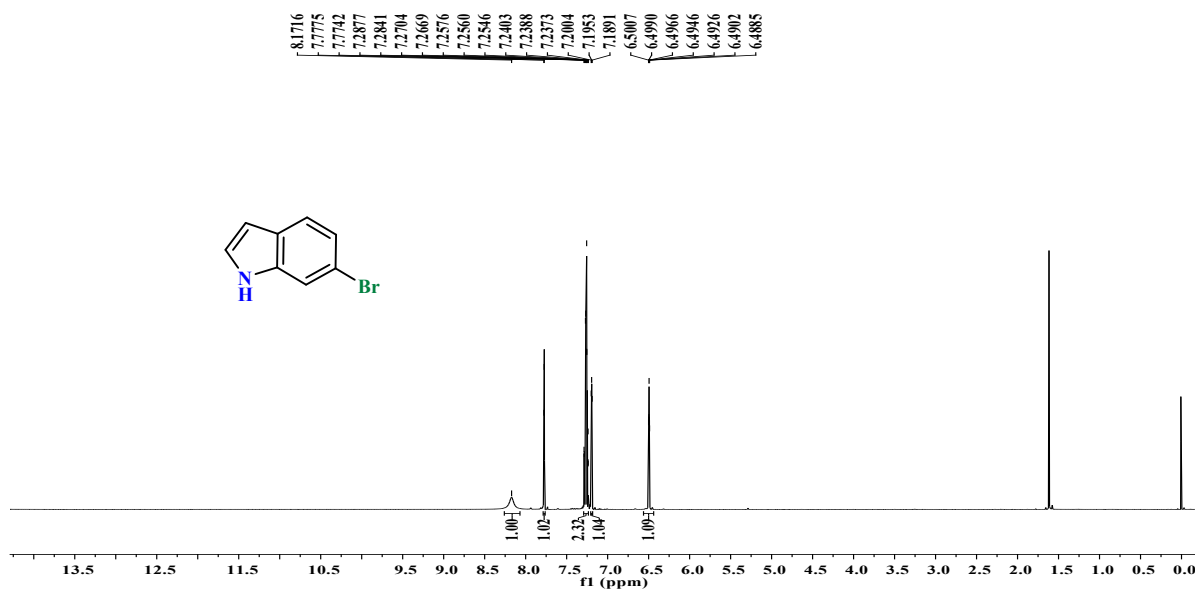

Figure S69.  $^1\text{H}$  NMR spectrum of **4d** in  $\text{CDCl}_3$  (500 MHz).

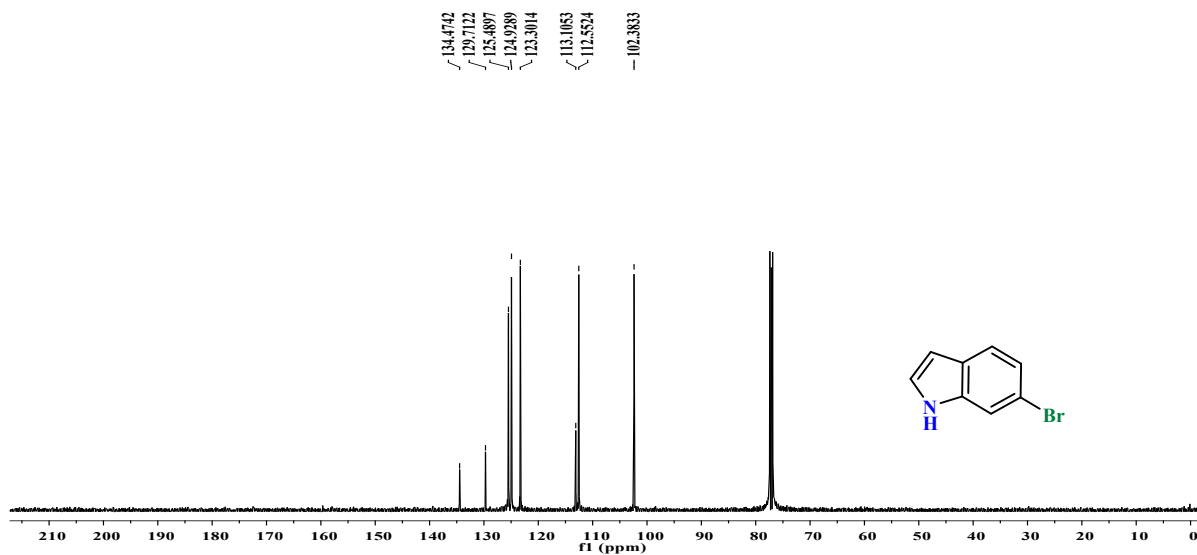

Figure S70. <sup>13</sup>C NMR spectrum of **4d** in CDCl<sub>3</sub> (500 MHz).

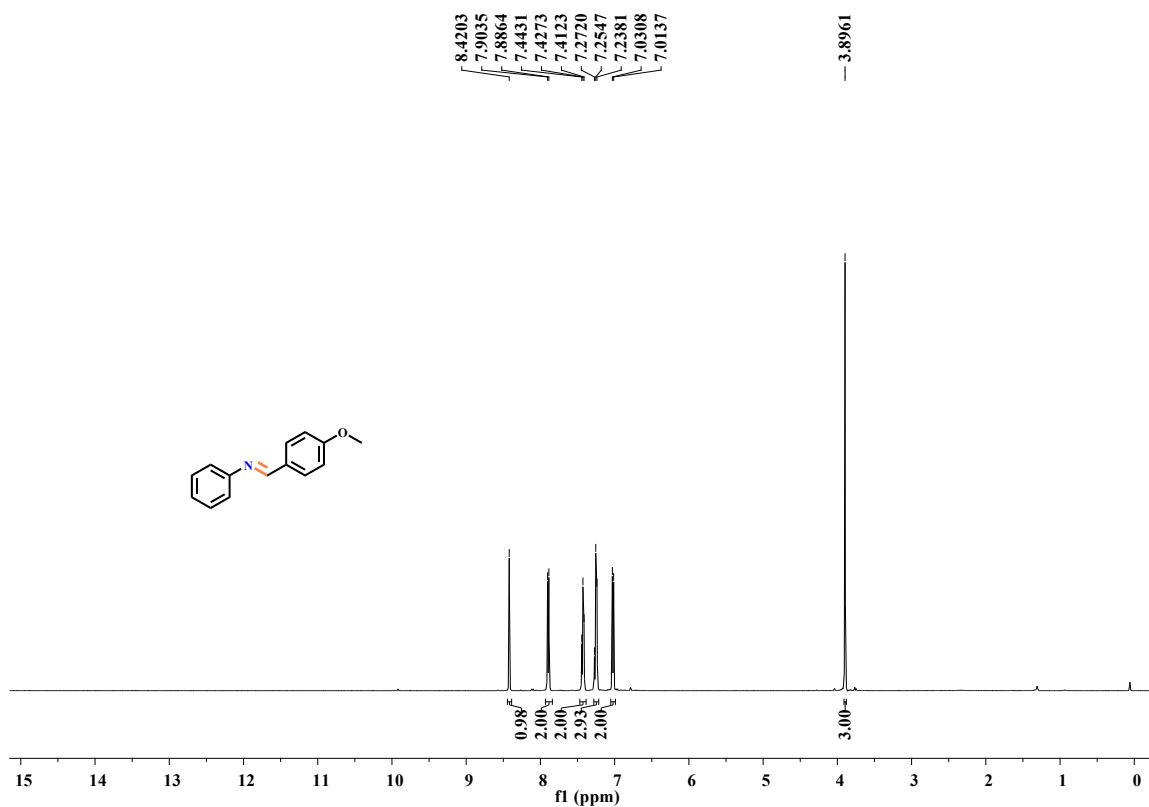

Figure S71. <sup>1</sup>H NMR spectrum of **2a''** in CDCl<sub>3</sub> (500 MHz).



## Notes and references

- (1) Chakraborty, S.; Mondal, R.; Pal, S.; Guin, A. K.; Roy, L.; Paul, N. D. Zn(II)-Catalyzed Selective N-Alkylation of Amines with Alcohols Using Redox Noninnocent Azo-Aromatic Ligand as Electron and Hydrogen Reservoir. *J. Org. Chem.* **2023**, *88*, 771–787.
- (2) Guin, A. K.; Pal, S.; Chakraborty, S.; Chakraborty, S.; Paul, N. D. N-Alkylation of Amines by C1-C10 Aliphatic Alcohols Using A Well-Defined Ru(II)-Catalyst. A Metal-Ligand Cooperative Approach. *J. Org. Chem.* **2023**, *88*, 5944–5961.
- (3) Elangovan, S.; Neumann, J.; Sortais, J. B.; Junge, K.; Darcel, C.; Beller, M. Efficient and Selective N-Alkylation of Amines with Alcohols Catalysed by Manganese Pincer Complexes. *Nat. Commun.* **2016**, *7*, 1–8.
- (4) Blank, B.; Madalska, M.; Kempe, R. An Efficient Method for the Selective Iridium-Catalyzed Monoalkylation of (Hetero)Aromatic Amines with Primary Alcohols. *Adv. Synth. Catal.* **2008**, *350*, 749–758.
- (5) Vellakkaran, M.; Singh, K.; Banerjee, D. An Efficient and Selective Nickel-Catalyzed Direct N-Alkylation of Anilines with Alcohols. *ACS Catal.* **2017**, *7*, 8152–8158.
- (6) Bains, A. K.; Kundu, A.; Yadav, S.; Adhikari, D. Borrowing Hydrogen-Mediated N-Alkylation Reactions by a Well-Defined Homogeneous Nickel Catalyst. *ACS Catal.* **2019**, *9*, 9051–9059.
- (7) Subaramanian, M.; Midya, S. P.; Ramar, P. M.; Balaraman, E. General Synthesis of N-Alkylation of Amines with Secondary Alcohols via Hydrogen Autotransfer. *Org. Lett.* **2019**, *21*, 8899–8903.
- (8) Kaloğlu, N.; Achard, M.; Bruneau, C.; Özdemir, İ. Ruthenium(II)-(Arene)-N-Heterocyclic Carbene Complexes: Efficient and Selective Catalysts for the N-Alkylation of Aromatic Amines with Alcohols. *Eur. J. Inorg. Chem.* **2019**, *2019*, 2598–2606.
- (9) Huang, M.; Li, Y.; Li, Y.; Liu, J.; Shu, S.; Liu, Y.; Ke, Z. Room Temperature N-Heterocyclic Carbene Manganese Catalyzed Selective N-Alkylation of Anilines with Alcohols. *Chem. Commun.* **2019**, *55*, 6213–6216.
- (10) Wei, D.; Yang, P.; Yu, C.; Zhao, F.; Wang, Y.; Peng, Z. N-Alkylation of Amines with Alcohols Catalyzed by Manganese(II) Chloride or Bromopentacarbonylmanganese(I). *J. Org. Chem.* **2021**, *86*, 2254–2263.
- (11) Landge, V. G.; Mondal, A.; Kumar, V.; Nandakumar, A.; Balaraman, E. Manganese Catalyzed N-Alkylation of Anilines with Alcohols: Ligand Enabled Selectivity. *Org. Biomol. Chem.* **2018**, *16*, 8175–8180.
- (12) Sankar, V.; Kathiresan, M.; Sivakumar, B.; Mannathan, S. Zinc-Catalyzed N-Alkylation of Aromatic Amines with Alcohols: A Ligand-Free Approach. 2020, pp 4409–4414.
- (13) Lan, X. B.; Ye, Z.; Yang, C.; Li, W.; Liu, J.; Huang, M.; Liu, Y.; Ke, Z. Tungsten-Catalyzed Direct N-Alkylation of Anilines with Alcohols. *ChemSusChem* **2021**, *14*, 860–865.
